# Supplementary material for: Conversion of human and mouse fibroblasts into lung-like epithelial cells
Source: Sci Rep. 2019 Jun 21;9:9027. doi: 10.1038/s41598-019-45195-y (PMC6588580; doi:10.1038/s41598-019-45195-y)

## **Conversion of human and mouse fibroblasts into lung-like epithelial cells**

Amy P. Wong, Sharareh Shojaie, Qin Liang, Sunny Xia, Michelle Di Paola, Saumel Ahmadi, Claudia Bilodeau, Jodi Garner, Martin Post, Pascal Duchesneau, Thomas K. Waddell, Christine E. Bear, Andras Nagy, Janet Rossant

## **Supplementary Files and Figures**

## **Supplementary Figures**

**Figure S1.** (a) Immunofluorescence staining for Ttf1 (*Nkx2-1*) show colocalization of the protein with mCherry transgene in a colony (representative white hatched area) of converted mouse cells and (b) day 1 post Cd326 sort (representative yellow hatched area). (c) G-banding karyotype analysis of the iLEC. (d) Real-time qRT-PCR analysis of gut, liver, thyroid and forebrain lineages in mouse iLEC and other control tissues. Genes were normalized to housekeeping gene *Gapdh* and expressed relative to respective control tissues. N=3 independent mouse iLEC conversion characterization. (e) Endogenous and transgene analysis of conversion factors in mouse converted cells. Genes were normalized to housekeeping gene *Gapdh* and expressed relative to respective control (black bar).

**Figure S2.** (a) Alternative conversion strategy for mouse fibroblasts. (b) Table summarizing the conversion efficiency when the cells were transduced with *Nkx2-1*. EMT; epithelial-mesenchymal transition, NA; not available. (c) Representative fluorescence (top) and DIC (bottom) images of epithelial-like colonies at the end of the conversion process. With the exception of Group A transduced with OSKM alone, Group B and iLEC showed epithelial-like colonies with mCherry expression. Note: Group B, with the highest mcherry expressing colonies expressed high levels *Nkx2-1* transgene. Yellow hatched area outlines mcherry expression in the respective conversion group. (d) Endogenous and transgene analysis of conversion factors in Group B cells that expressed the strongest mcherry transgene. N=3 independent mouse iLEC conversion characterization. Scale bar represents 150µm.

**Figure S3.** (a) Representative image of mouse iLEC under low magnification. Mixed non-immune immunoglobulins (IgG) were used to exclude non-specific binding of secondary antibodies. (b) Characterization of mouse iLEC after 1 passage show mouse iLEC do not express distal epithelial cell markers proSPC or Ccsp. Scale bars represent 90-100µm.

**Figure S4.** Unbiased hierarchical clustering of single cells from all three groups show single iLEC segregate into 3 distinct groups. Most of the iLEC (38/48) do not cluster with either adult lung epithelial cells or embryonic lung epithelia (green box). These cells demonstrate up-regulated expression of lung developmental genes such as *Gata6* and *Pdpn* but also foregut endoderm markers *Pax9*, *Otx2* and early mesenchymal marker *Snail*. Few 6/48 iLEC clustered with both embryonic and adult lung epithelial cells (black box) and expressed many of the lung genes (see manuscript Fig 2f). Interestingly 4/48 iLEC (blue box) clustered with some adult lung epithelial cells and appear to express high levels of *Epcam* and down-regulated expression of lung developmental genes *Gata6* and *Pdpn*.

**Figure S5.** (a) Representative global (low magnification) view of the recellularized rat lung scaffolds with mouse iLEC (Gfp+) show airway recellularization with lung epithelia (Ttf1+panKrt+) cells. (b) Representative H&E images of recellularized scaffolds showing a mass of Group B cells in the decellularized graft (hatched). (c) Immunofluorescence characterization show Group B donor (Gfp+) cells that express lung marker Ttf1 but not epithelial (panKrt-negative, yellow hatched area). Scale bars represent 45-200µm.

**Figure S6.** (a) Representative hematoxylin & eosin staining of mouse teratoma formed by R1 ES cells alone. (b) Immunofluorescence staining of mouse teratomas for various lung epithelial cell lineages. Three independent batches of R1 ES cells were used to generate 6 teratomas in 3 transplanted mice recipients. Scale bars represent 22-45 $\mu$ m. Non-immune immunoglobulins (IgY and IgGs) were used to exclude non-specific binding of secondary antibodies. Yellow hatched represent areas of mouse ES-derived epithelia.

**Figure S7.** Normal mouse lung was used as staining controls. Immunofluorescence staining for various lung epithelial cell markers. Scale bar represents 22 $\mu$ m. Non-immune immunoglobulins (IgY and IgGs) were used to exclude non-specific binding of secondary antibodies.

**Figure S8.** (a) Representative DIC images of additional human iLEC derived from fibroblasts harboring the Cystic Fibrosis main mutation F508del genotype. Epithelial colonies emerged during the conversion process (yellow hatched borderline). FACS-sorting for CD326 enriched for epithelial cells. Scale bar represents 150-200 $\mu$ m. (b) Human bronchial epithelial cells were used as controls for immunofluorescence characterization of the iLEC. Scale bar represents 45 $\mu$ m.

**Figure S9.** Additional characterization of iLEC (GFP+) contribution to the chimeric teratomas. (a) Low magnification teratoma images show wider view of donor GFP+ iLEC contribution to both airway (white arrows) and non-airway structures (yellow arrows). (b) GFP+ iLEC do not contribute to pancreas, liver, thyroid, forebrain lineages. Cells positive for the respective markers (yellow arrows) were GFP-negative suggesting they were ES cell-derived. Scale bars represent 45-120 $\mu$ m.

**Figure S10.** (a) Characterization of human ES cell-derived teratomas. (b) Human tracheal and lung tissues were used as experimental and staining controls respectively. Immunofluorescence staining for various lung epithelial cell markers. White hatched represent areas of human ES-derived epithelia. White bar represents 29 $\mu$ m. Non-immune immunoglobulins (IgGs) were used to exclude non-specific binding of secondary antibodies.

Supplementary Table 1: List of Antibodies

| <b>Antibody</b>      | <b>Clone</b> | <b>Manufacturer</b> | <b>ID</b>  | <b>Assay</b> | <b>Dilution</b> |
|----------------------|--------------|---------------------|------------|--------------|-----------------|
| panKRT               | AE1/AE3      | Abcam               | Ab80826    | IF,FC        | 1:350           |
| panKRT               | AE1/AE3      | Dako                | Z0622      | IF           | 1:500           |
| Krt14                | LL002        | Abcam               | Ab7800     | IF           | 1:1000          |
| Krt8/18              | EP1628Y      | Abcam               | Ab53280    | IF           | 1:500           |
| Krt5                 |              | Abcam               | Ab53121    | IF           | 1:500           |
| Krt19                | RCK108       | Dako                | M0888      | IF           | 1:400           |
| CFTR                 | L12B4        | Millipore           | MAB3484    | IF           | 1:250           |
| CFTR                 | MM13-4       | Millipore           | 05-581     | IF           | 1:100           |
| CCSP                 |              | Abcam               | Ab40873    | IF           | 1:300           |
| CCSP                 | T-18         | Santa Cruz          | Sc-9772    | IF           | 1:200           |
| NKX2-1               | EP1584Y      | Abcam               | Ab76013    | IF,FC        | 1:500           |
| NKX2-1               | 8G7G3/1      | Dako                | M3575      | IF,FC        | 1:300           |
| ZO1                  |              | Invitrogen          | 33-9100    | IF           | 1:100           |
| SOX2                 |              | R&D Systems         | AF2018     | IF,FC        | 1:250           |
| SOX2                 | N1C3         | GeneTex             | GTX101507  | IF           | 1:500           |
| SOX17                | 245013       | R&D Systems         | MAB1924    |              | 1:100           |
| deltaN P63           | Poly6190     | BioLegend           | 619002     | IF,FC        | 1:500           |
| P63                  | EPR5701      | Abcam               | Ab124762   | IF           | 1:100           |
| POUF51               |              | GeneTex             | GTX100622  | IF, FC       | 1:500           |
| Thyroglobulin        | EPR9730      | Abcam               | Ab156008   | IF           | 1:200           |
| Ki67                 | MIB-5        | Dako                | M7248      | IF           | 1:200           |
| GFP                  |              | Abcam               | Ab13970    | IF           | 1:200           |
| Fsp1                 | S100A4       | Millipore           | 07-2274    | FC           | 1:250           |
| FOXJ1                | 2A5          | eBioscience         | 14-9965    | IF           | 1:100           |
| FOXA2                | M-20         | Santa Cruz          | Sc-6554    | IF           | 1:100           |
| Acetylated a-tubulin | 6-11B-1      | Abcam               | Ab24610    | IF           | 1:300           |
| ProSFTPC             |              | Abcam               | Ab40879    | IF           | 1:250           |
| SCGB3A2              | K-12         | Santa Cruz          | Sc-48320   | IF           | 1:250           |
| Vimentin             | EPR3776      | Abcam               | Ab92547    | IF           | 1:250           |
| Muc5ac               | 45M1         | ThermoFisher        | MA5-12178  | IF           | 1:200           |
| Muc5b                | 19.4E        | Abcam               | Ab77995    | IF           | 1:200           |
| Muc1                 | NCRC48       | Abcam               | Ab28081    | IF           | 1:250           |
| Nestin               | 10C2         | Millipore           | MAB5326    | IF           | 1:300           |
| Hpd1                 | DHIC2-4A10   | Stemgent            | 09-0046    | IF           | 1:250           |
| PDX1                 | A-17         | Santa Cruz          | Sc-14664   | IF           | 1:200           |
| B3-tubulin           | 2G10         | Sigma               | T8578      | IF           | 1:300           |
| PAX6                 | AD2.38       | Abcam               | Ab78545    | IF           | 1:250           |
| PAX8                 | EPR13511     | Abcam               | Ab189249   | IF           | 1:250           |
| HNF6                 |              | Abcam               | Ab83564    | IF           | 1:200           |
| CDX2                 | EPR2764Y     | Abcam               | Ab76541    | IF           | 1:200           |
| Albumin              | HSA-11       | Sigma               | SAB4200711 | IF           | 1:500           |
| CD326-A488           | 9C4          | BioLegend           | 324210     | FC           | 1:500           |

Supplementary Fig 1

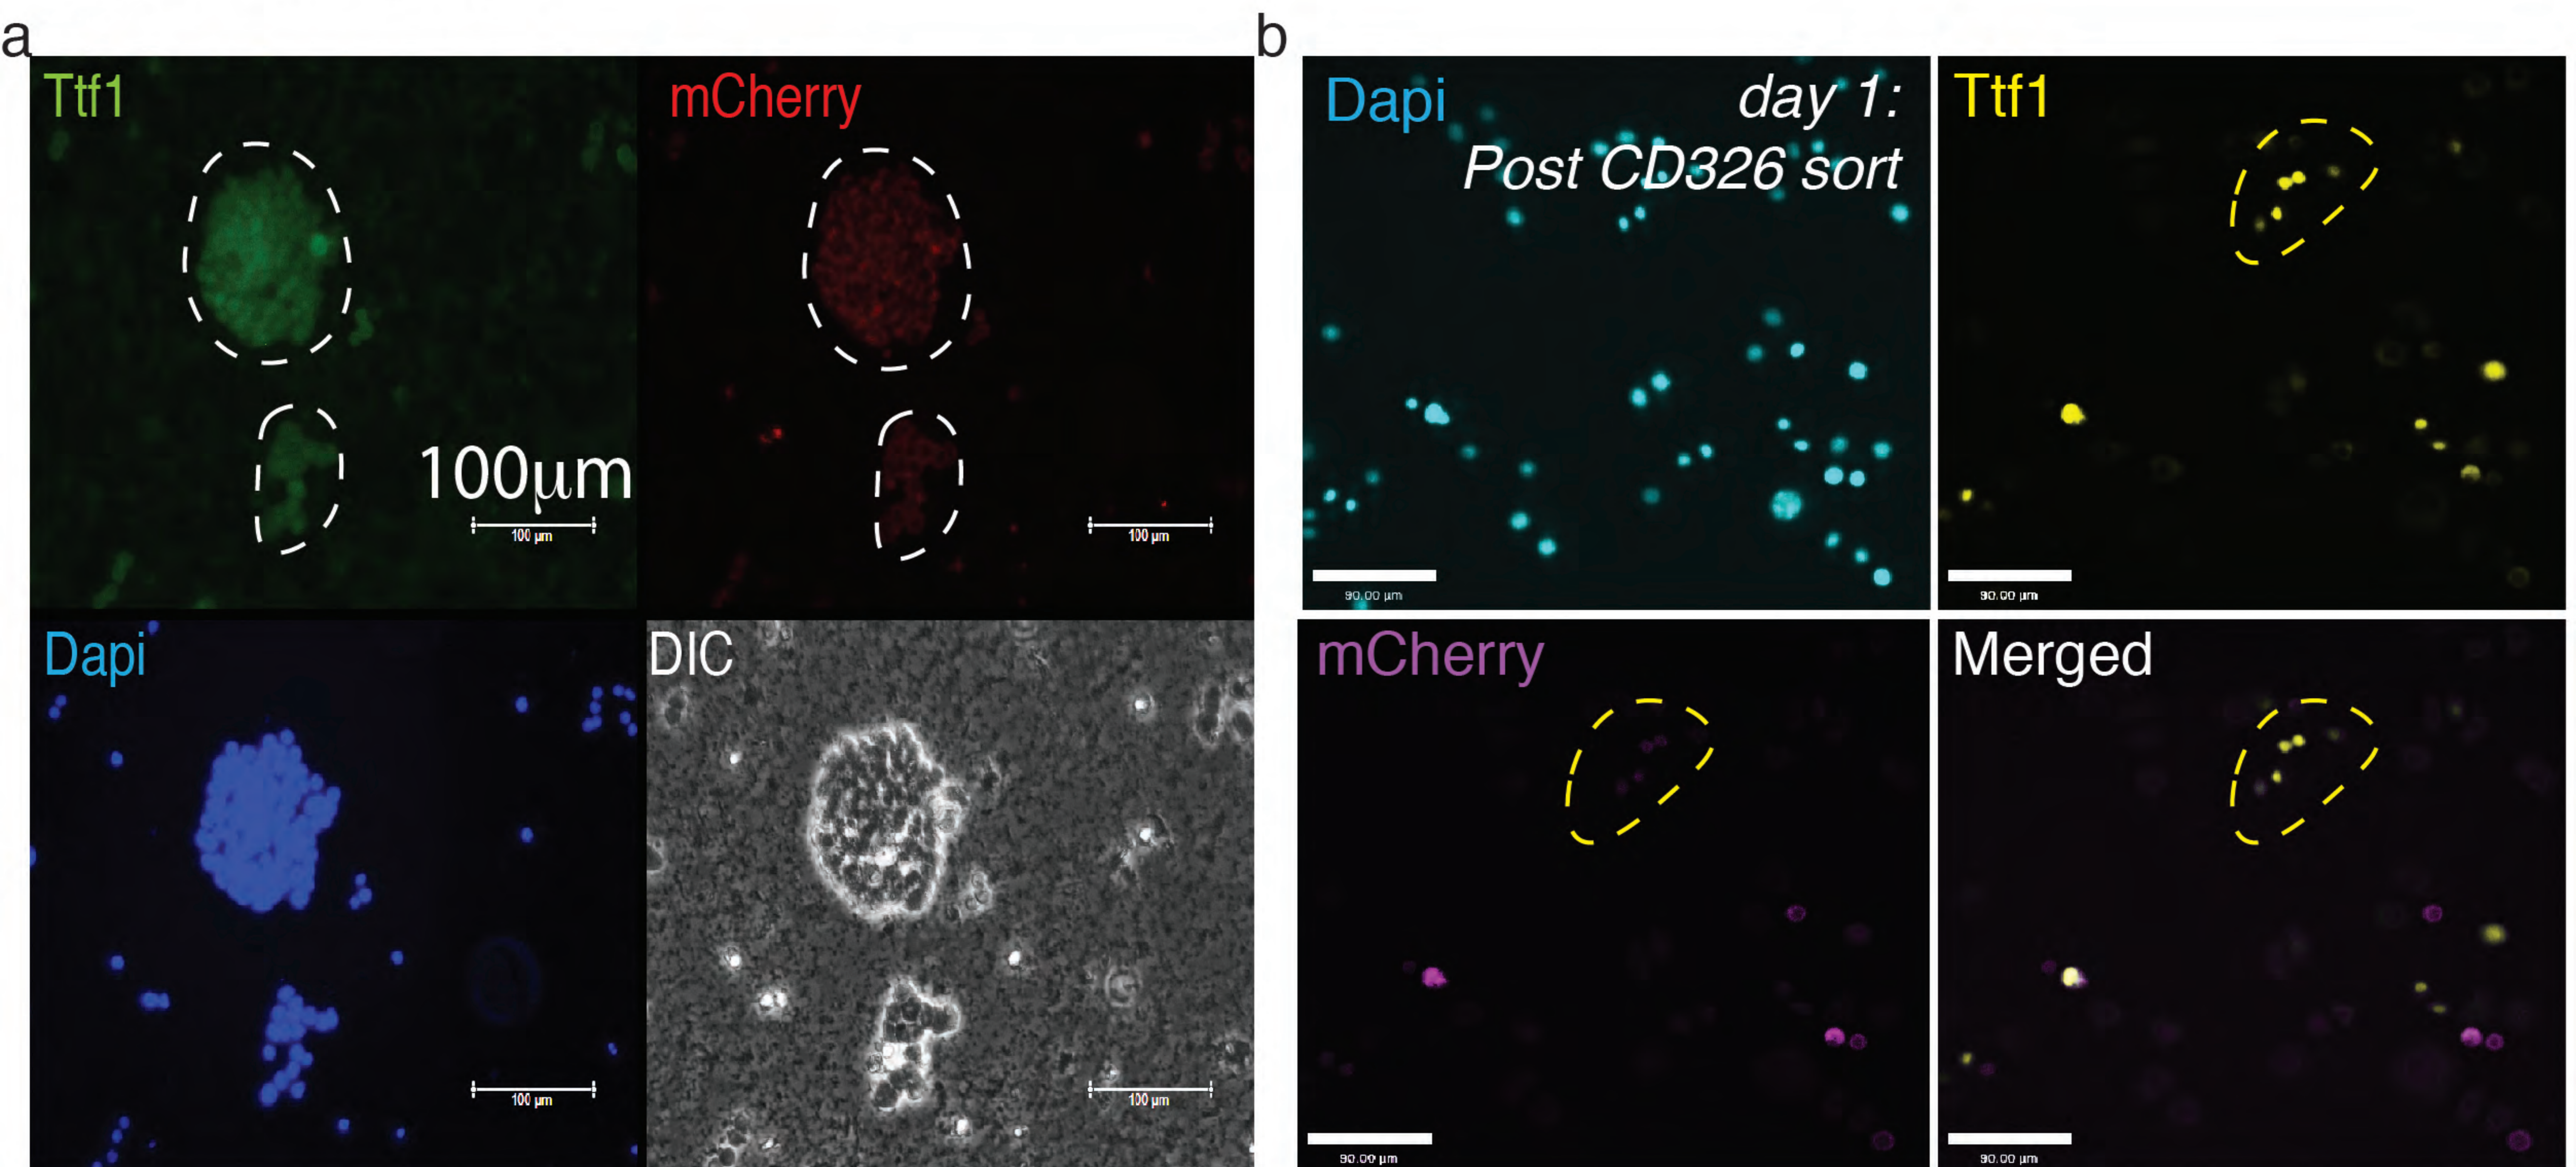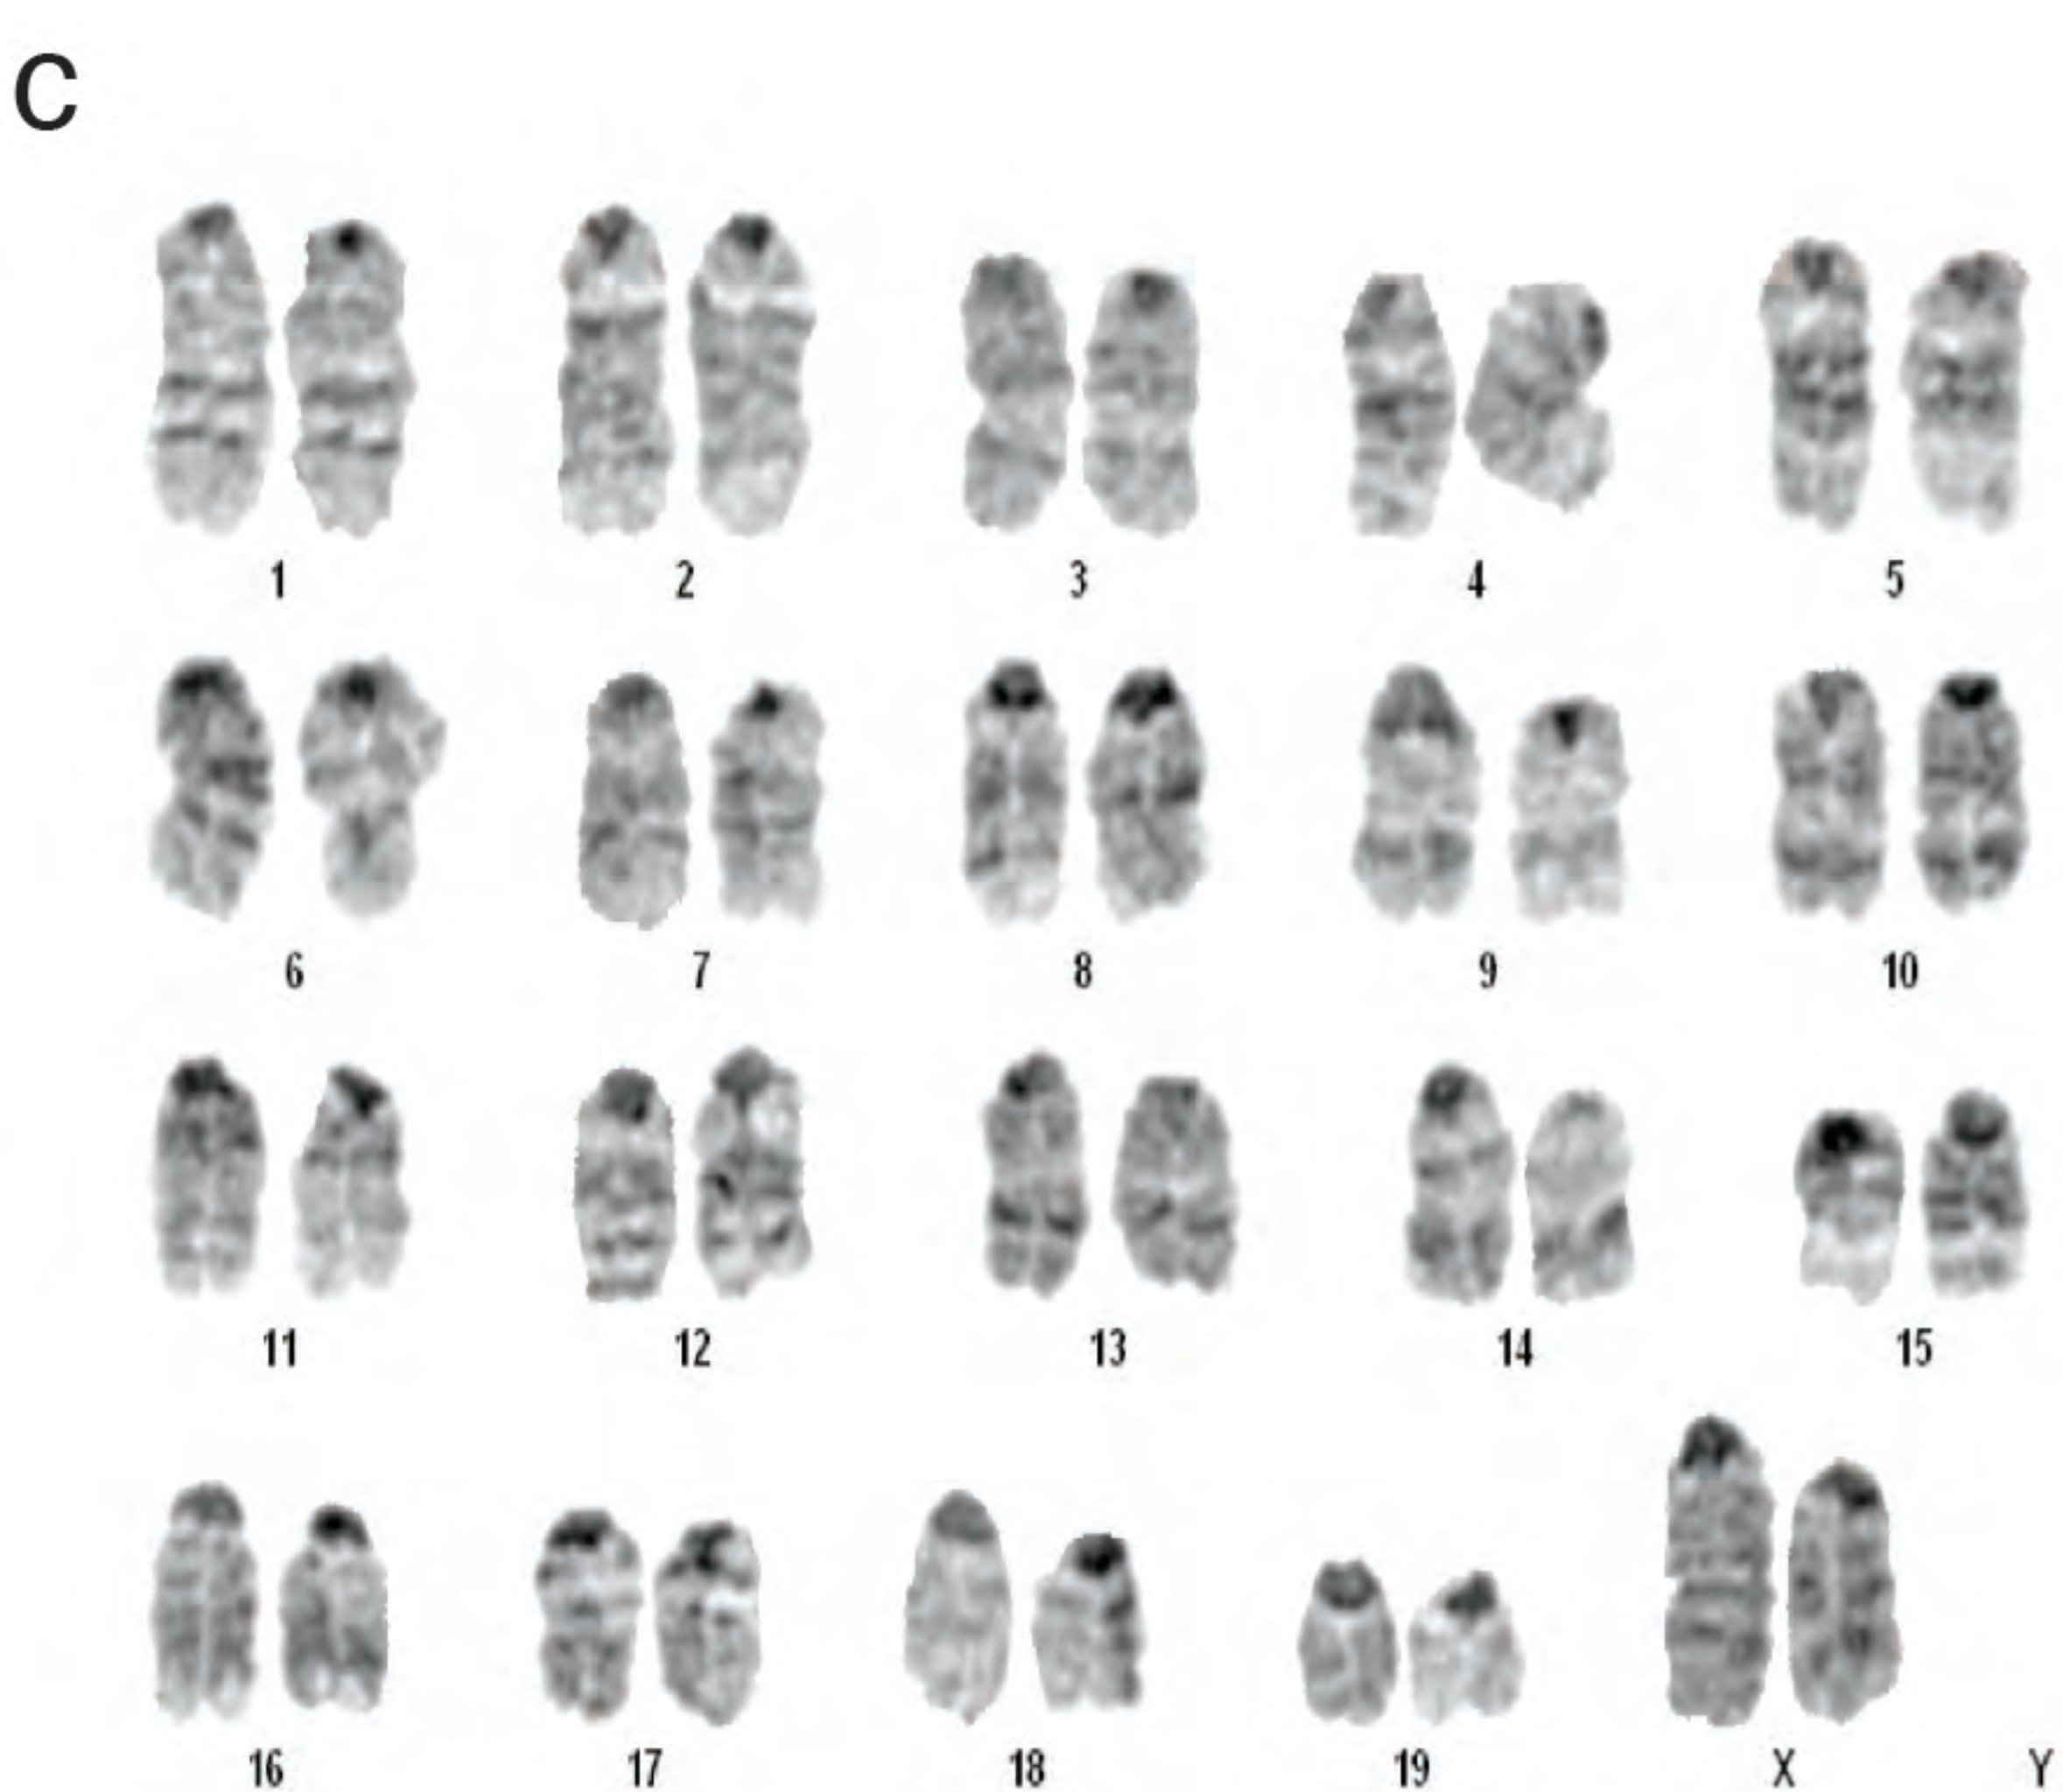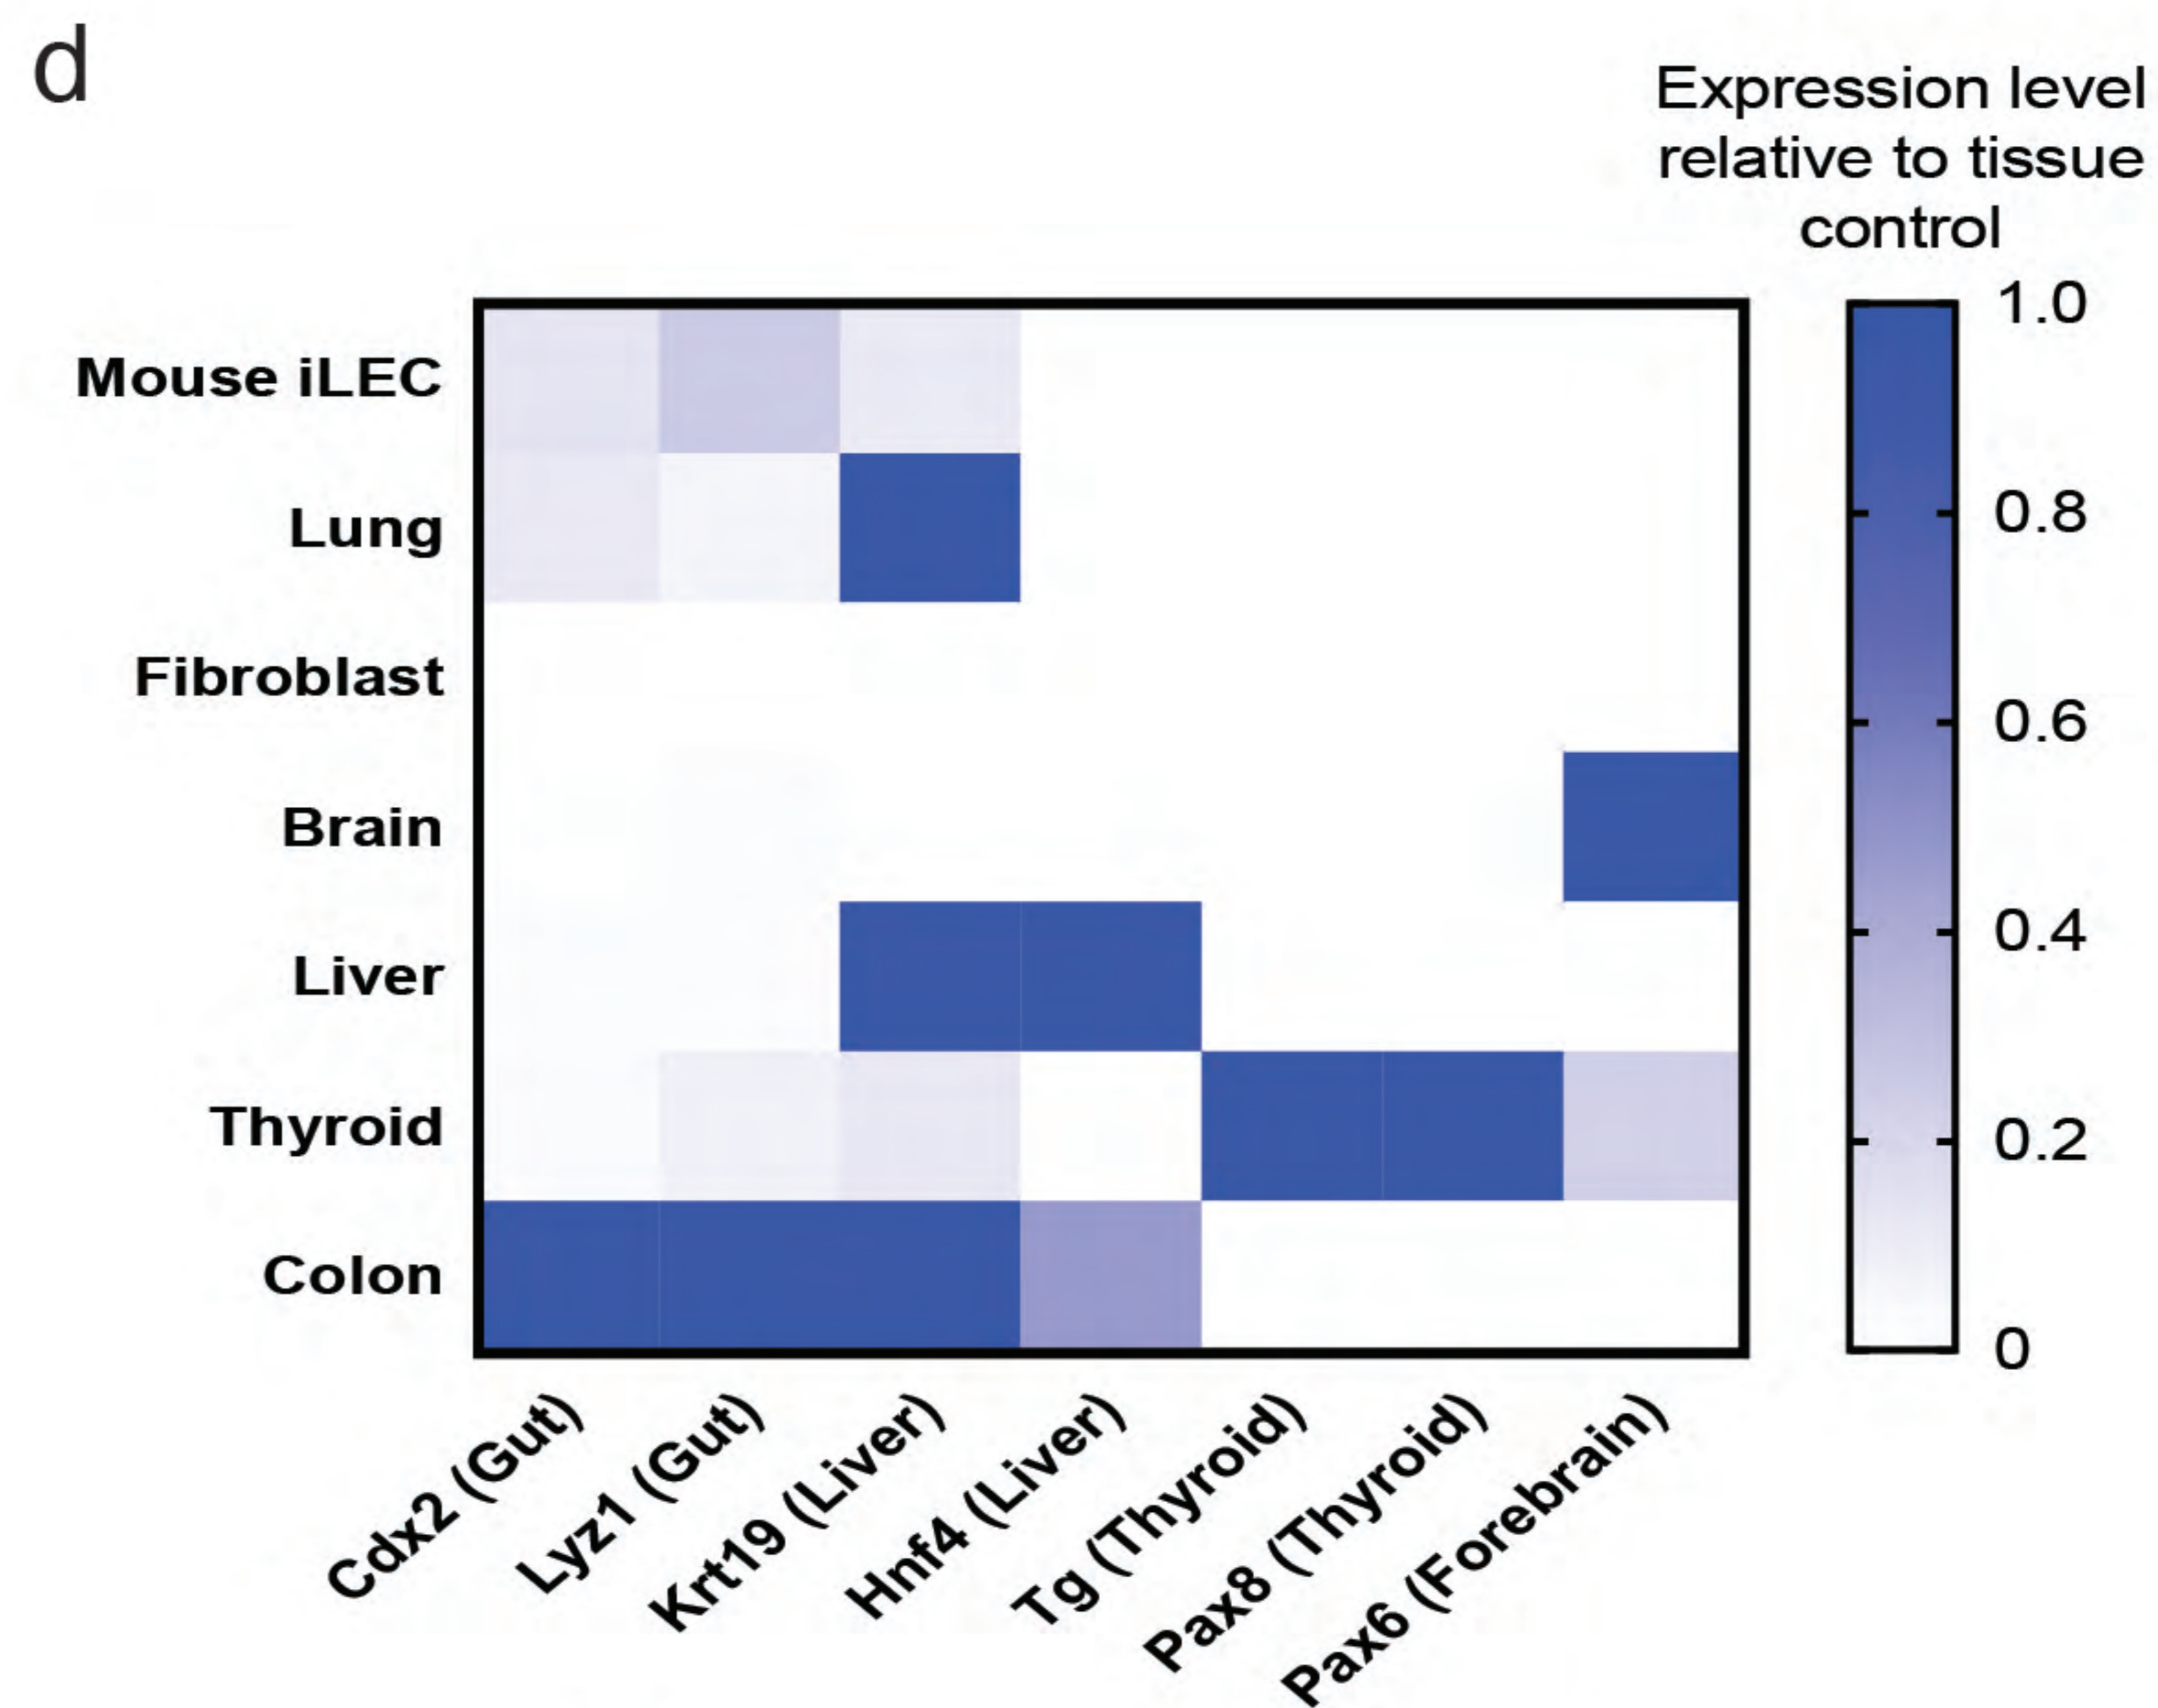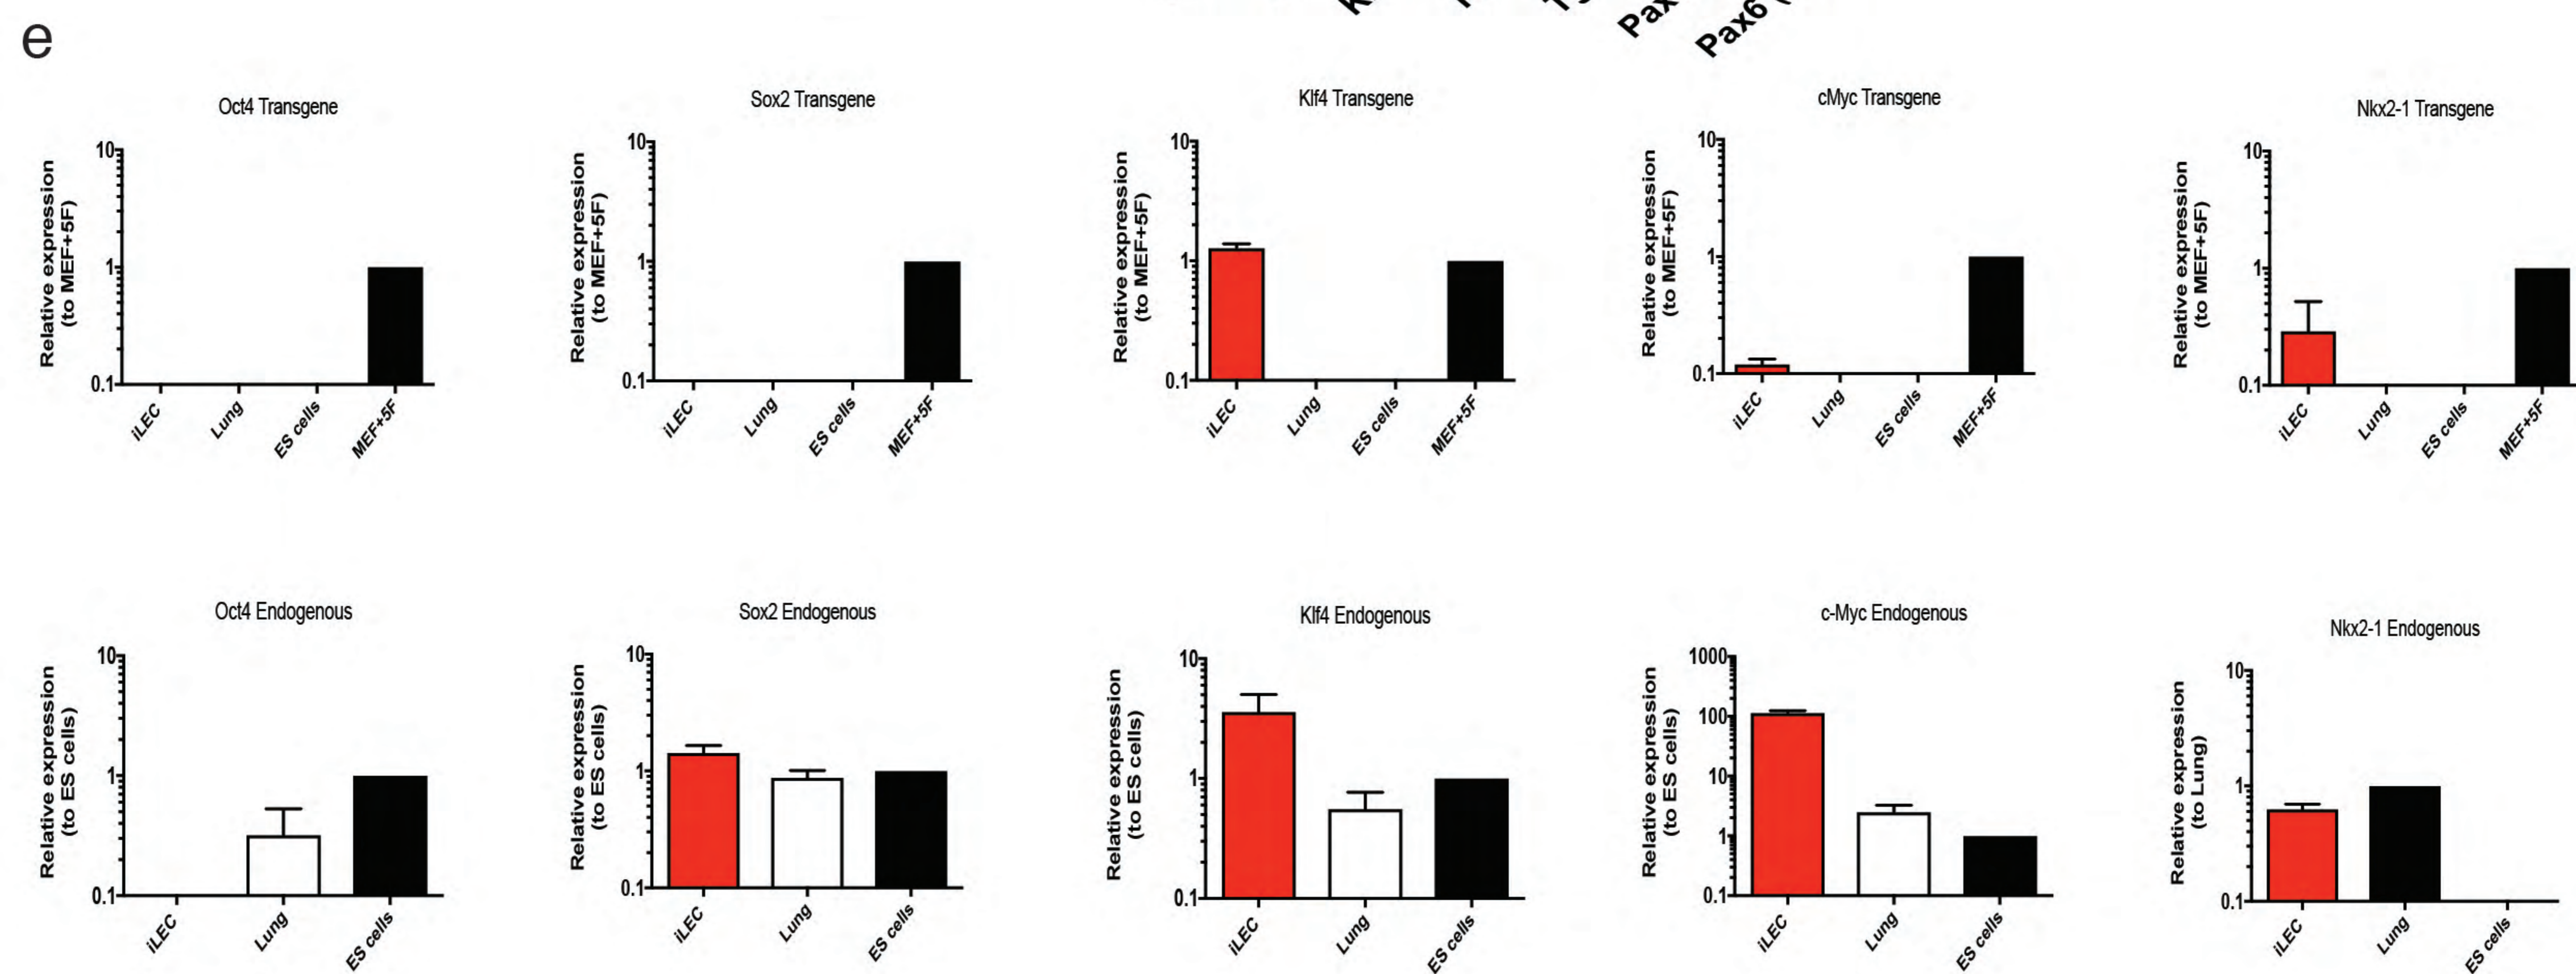

Supplementary Fig 2

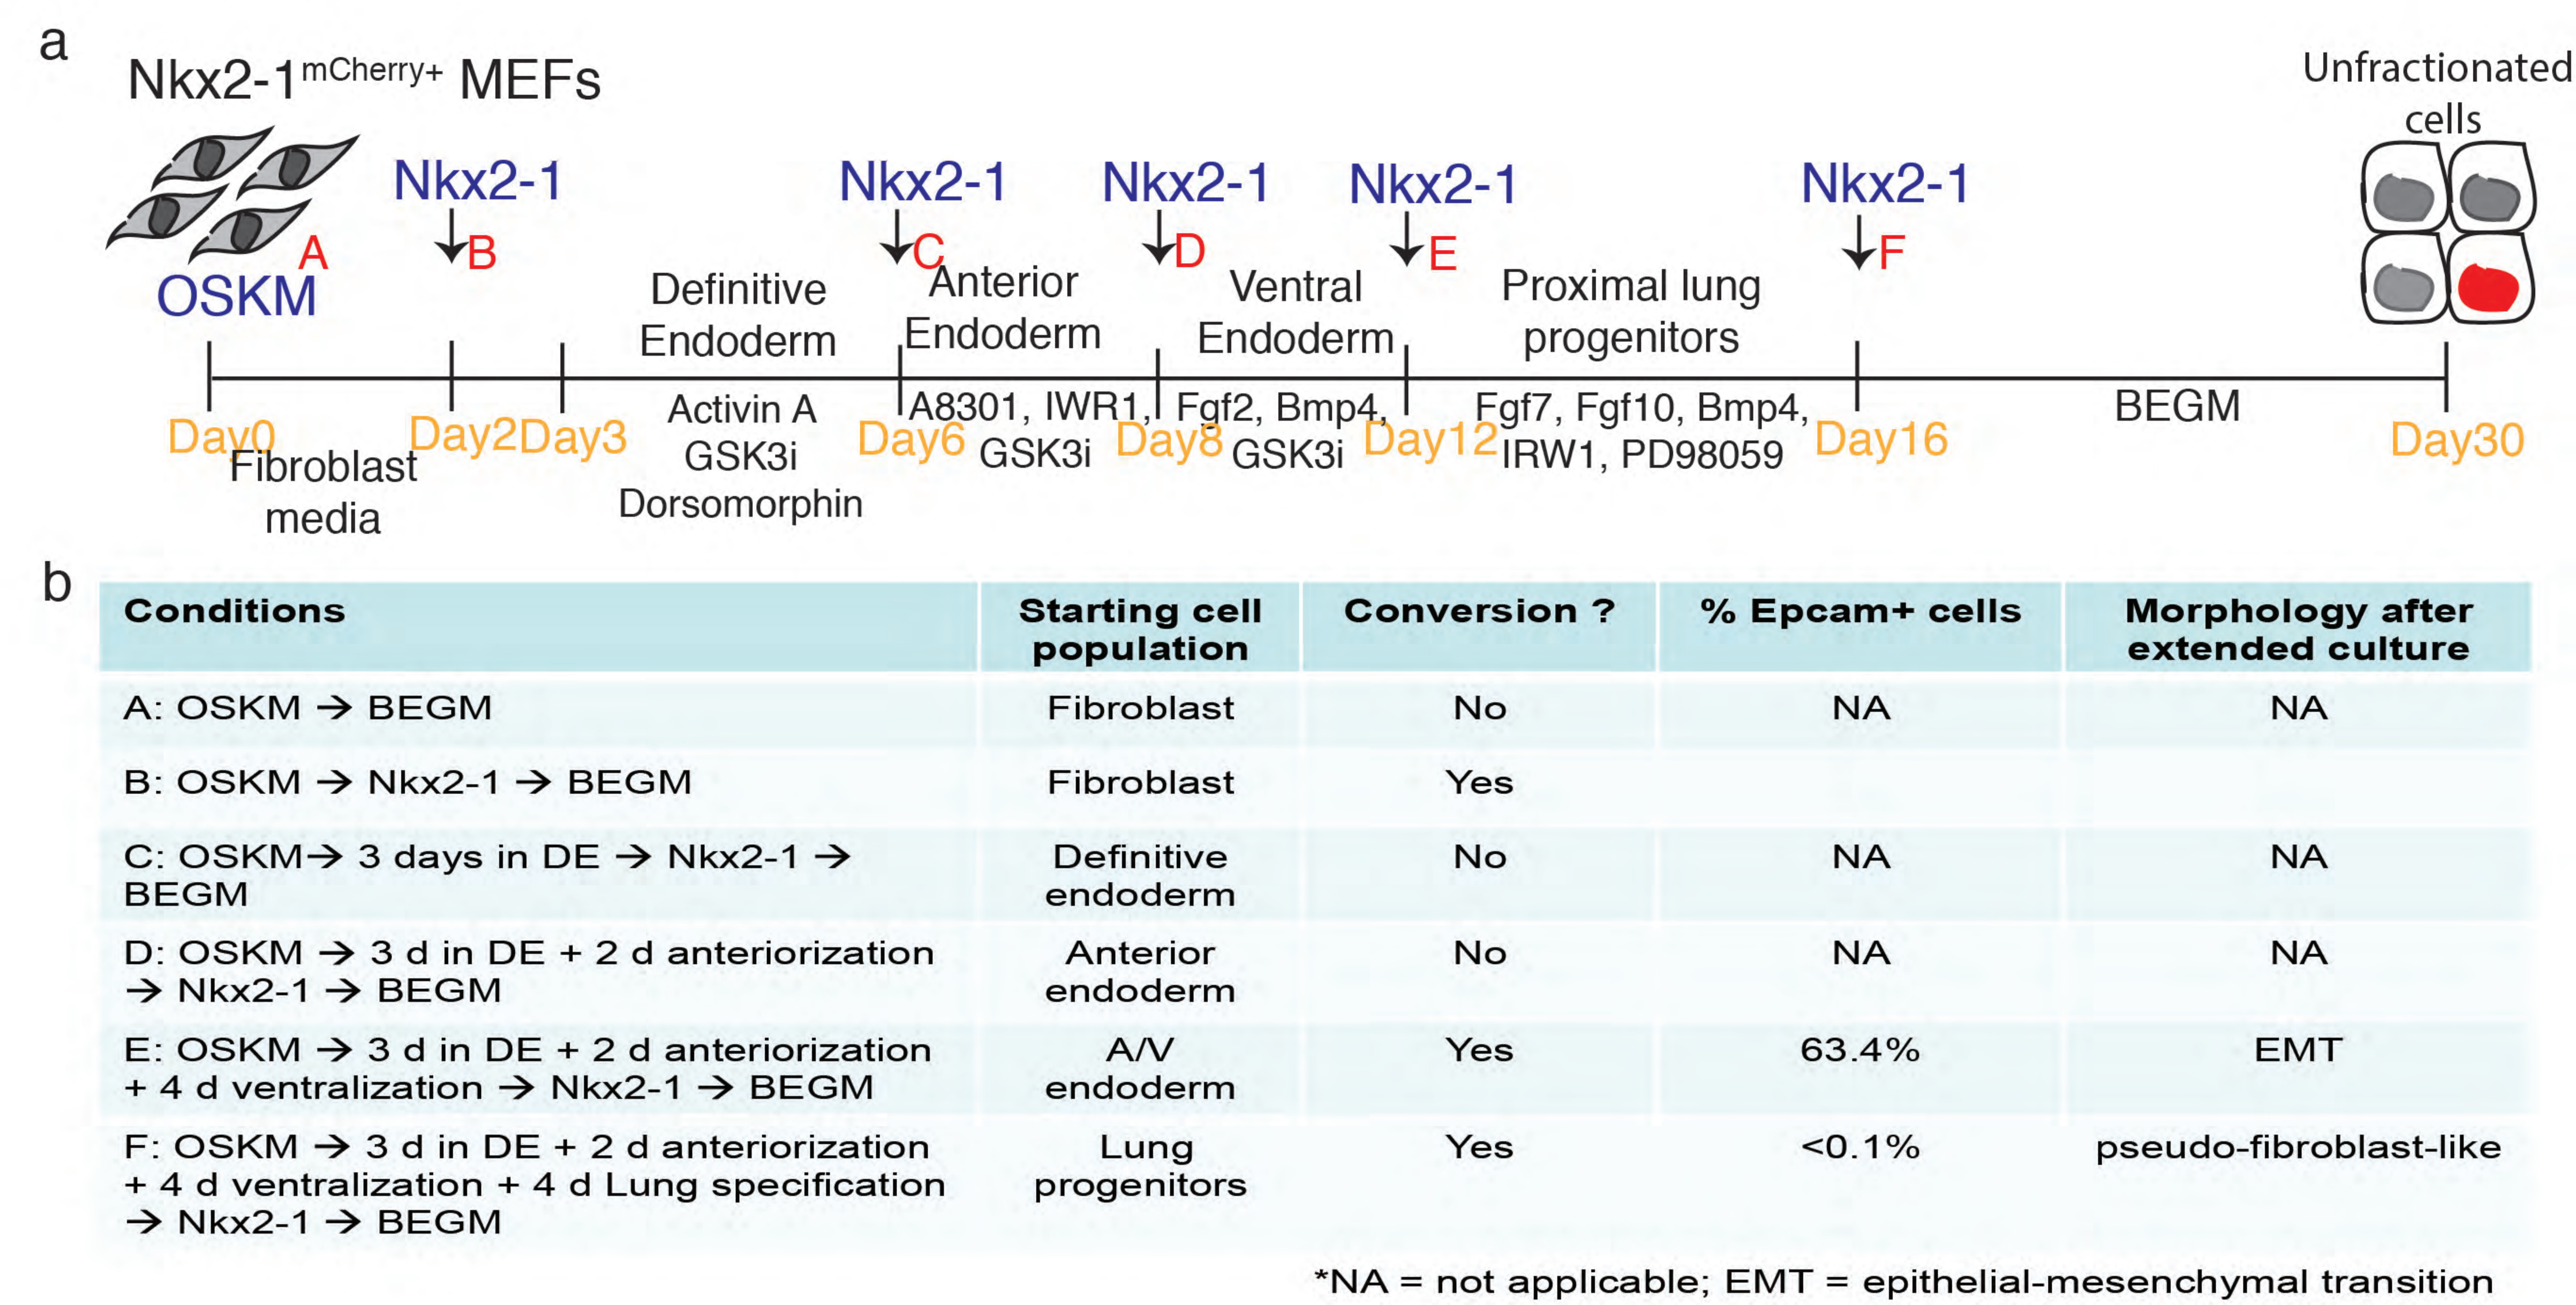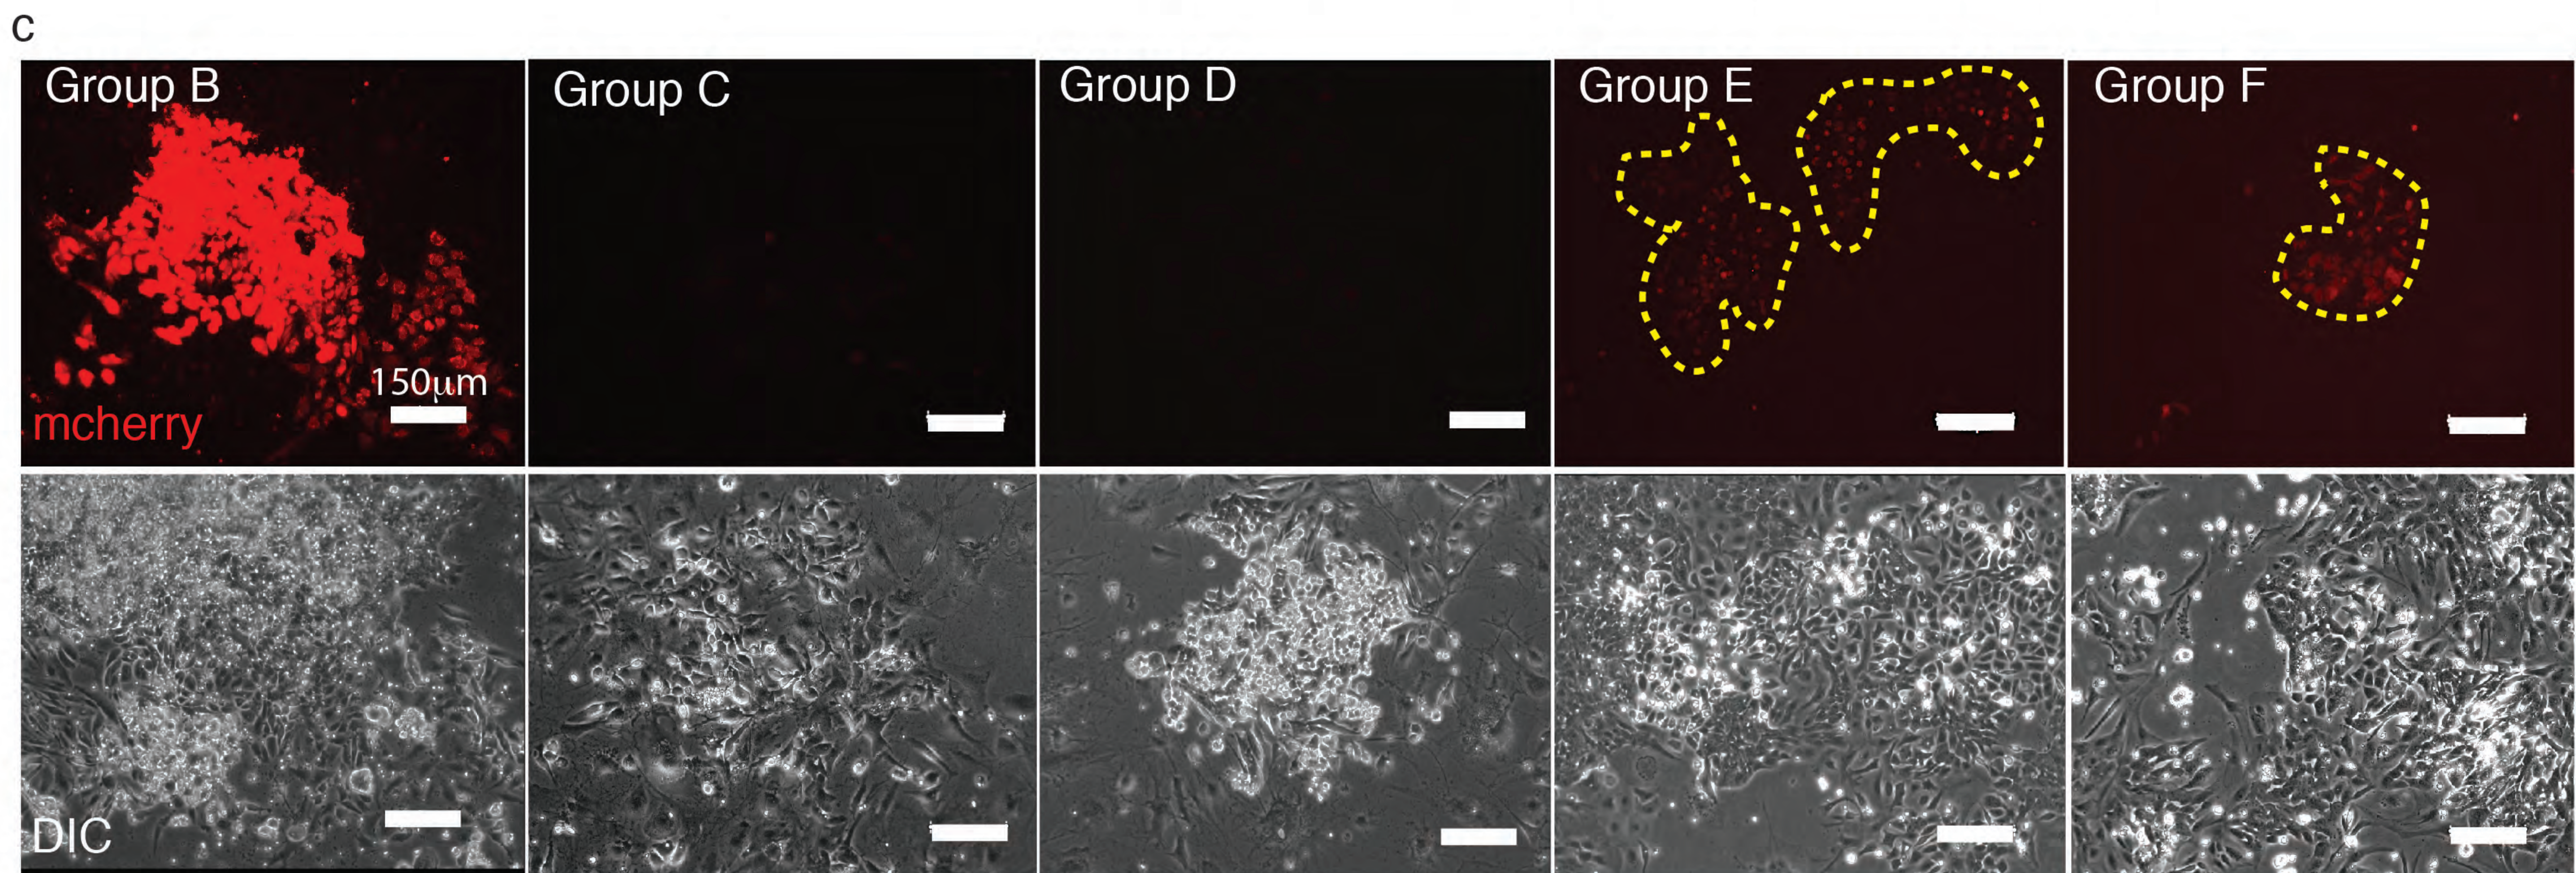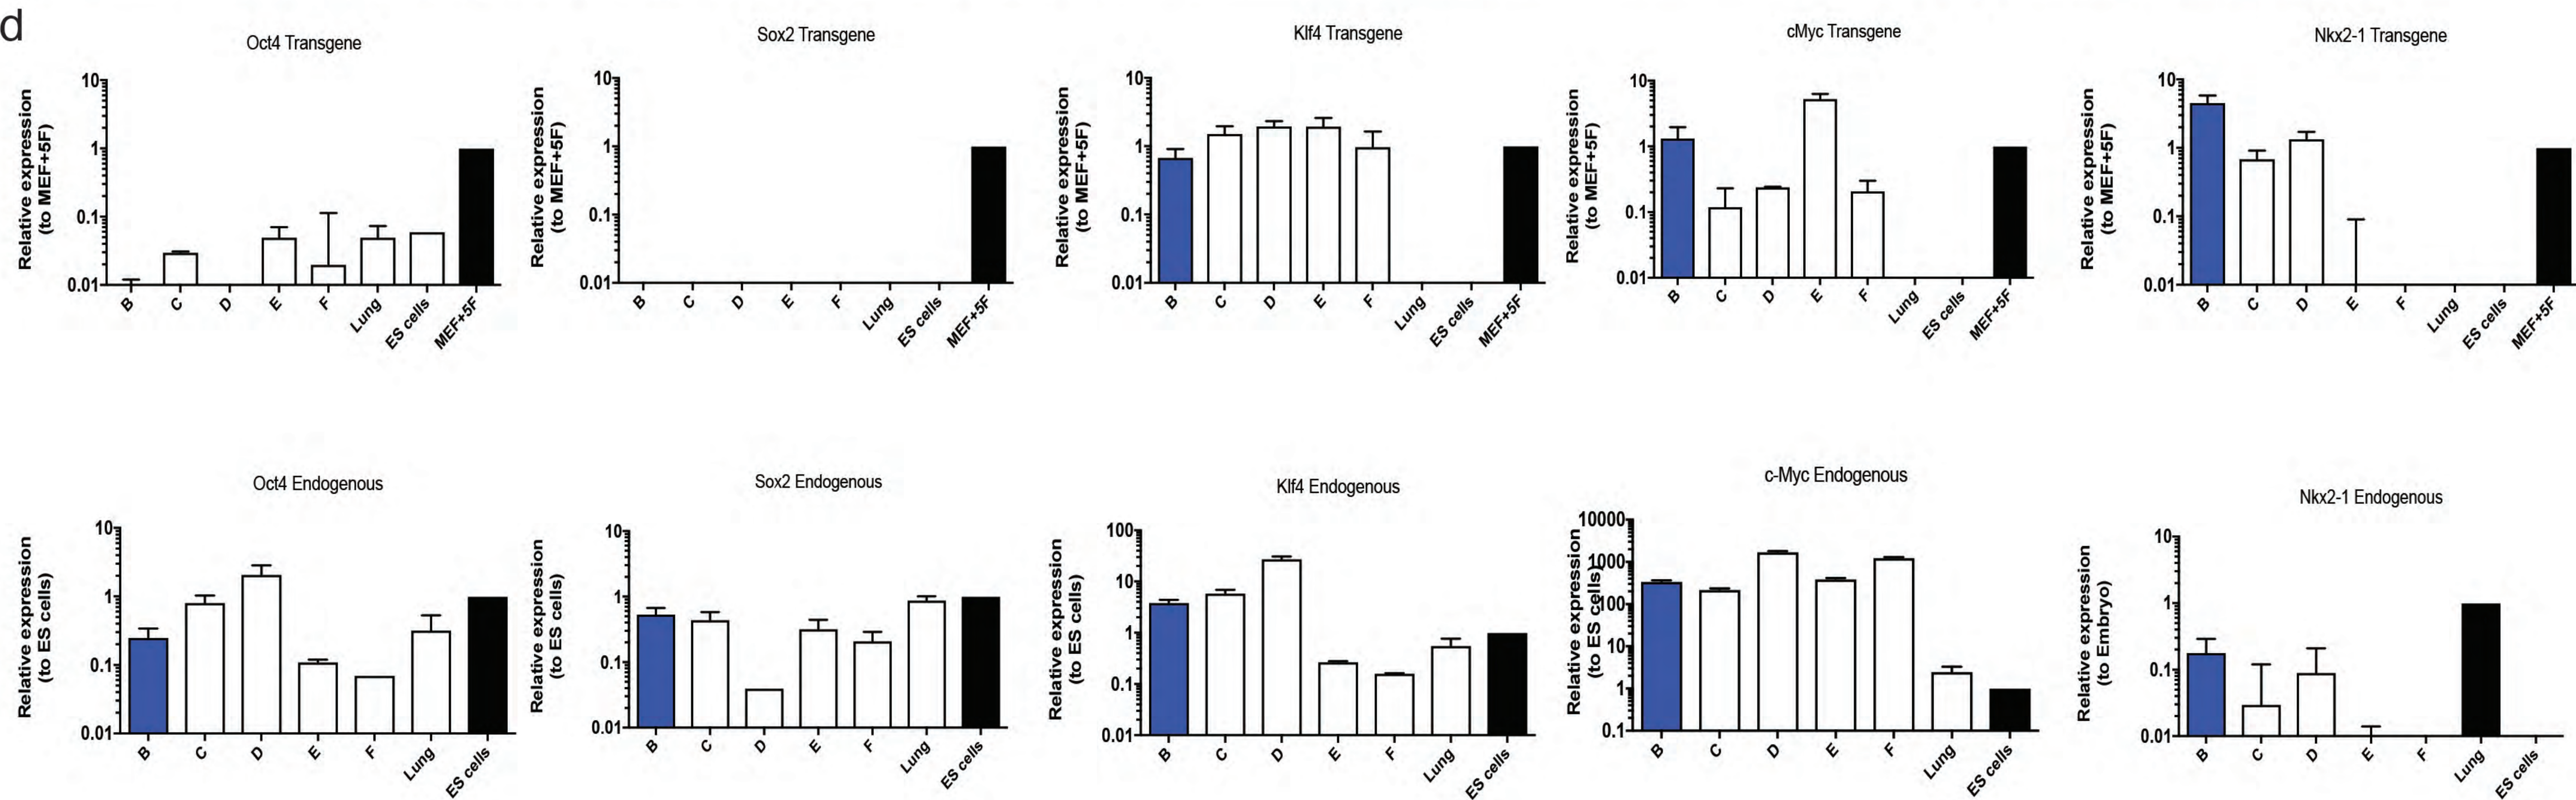

a

a

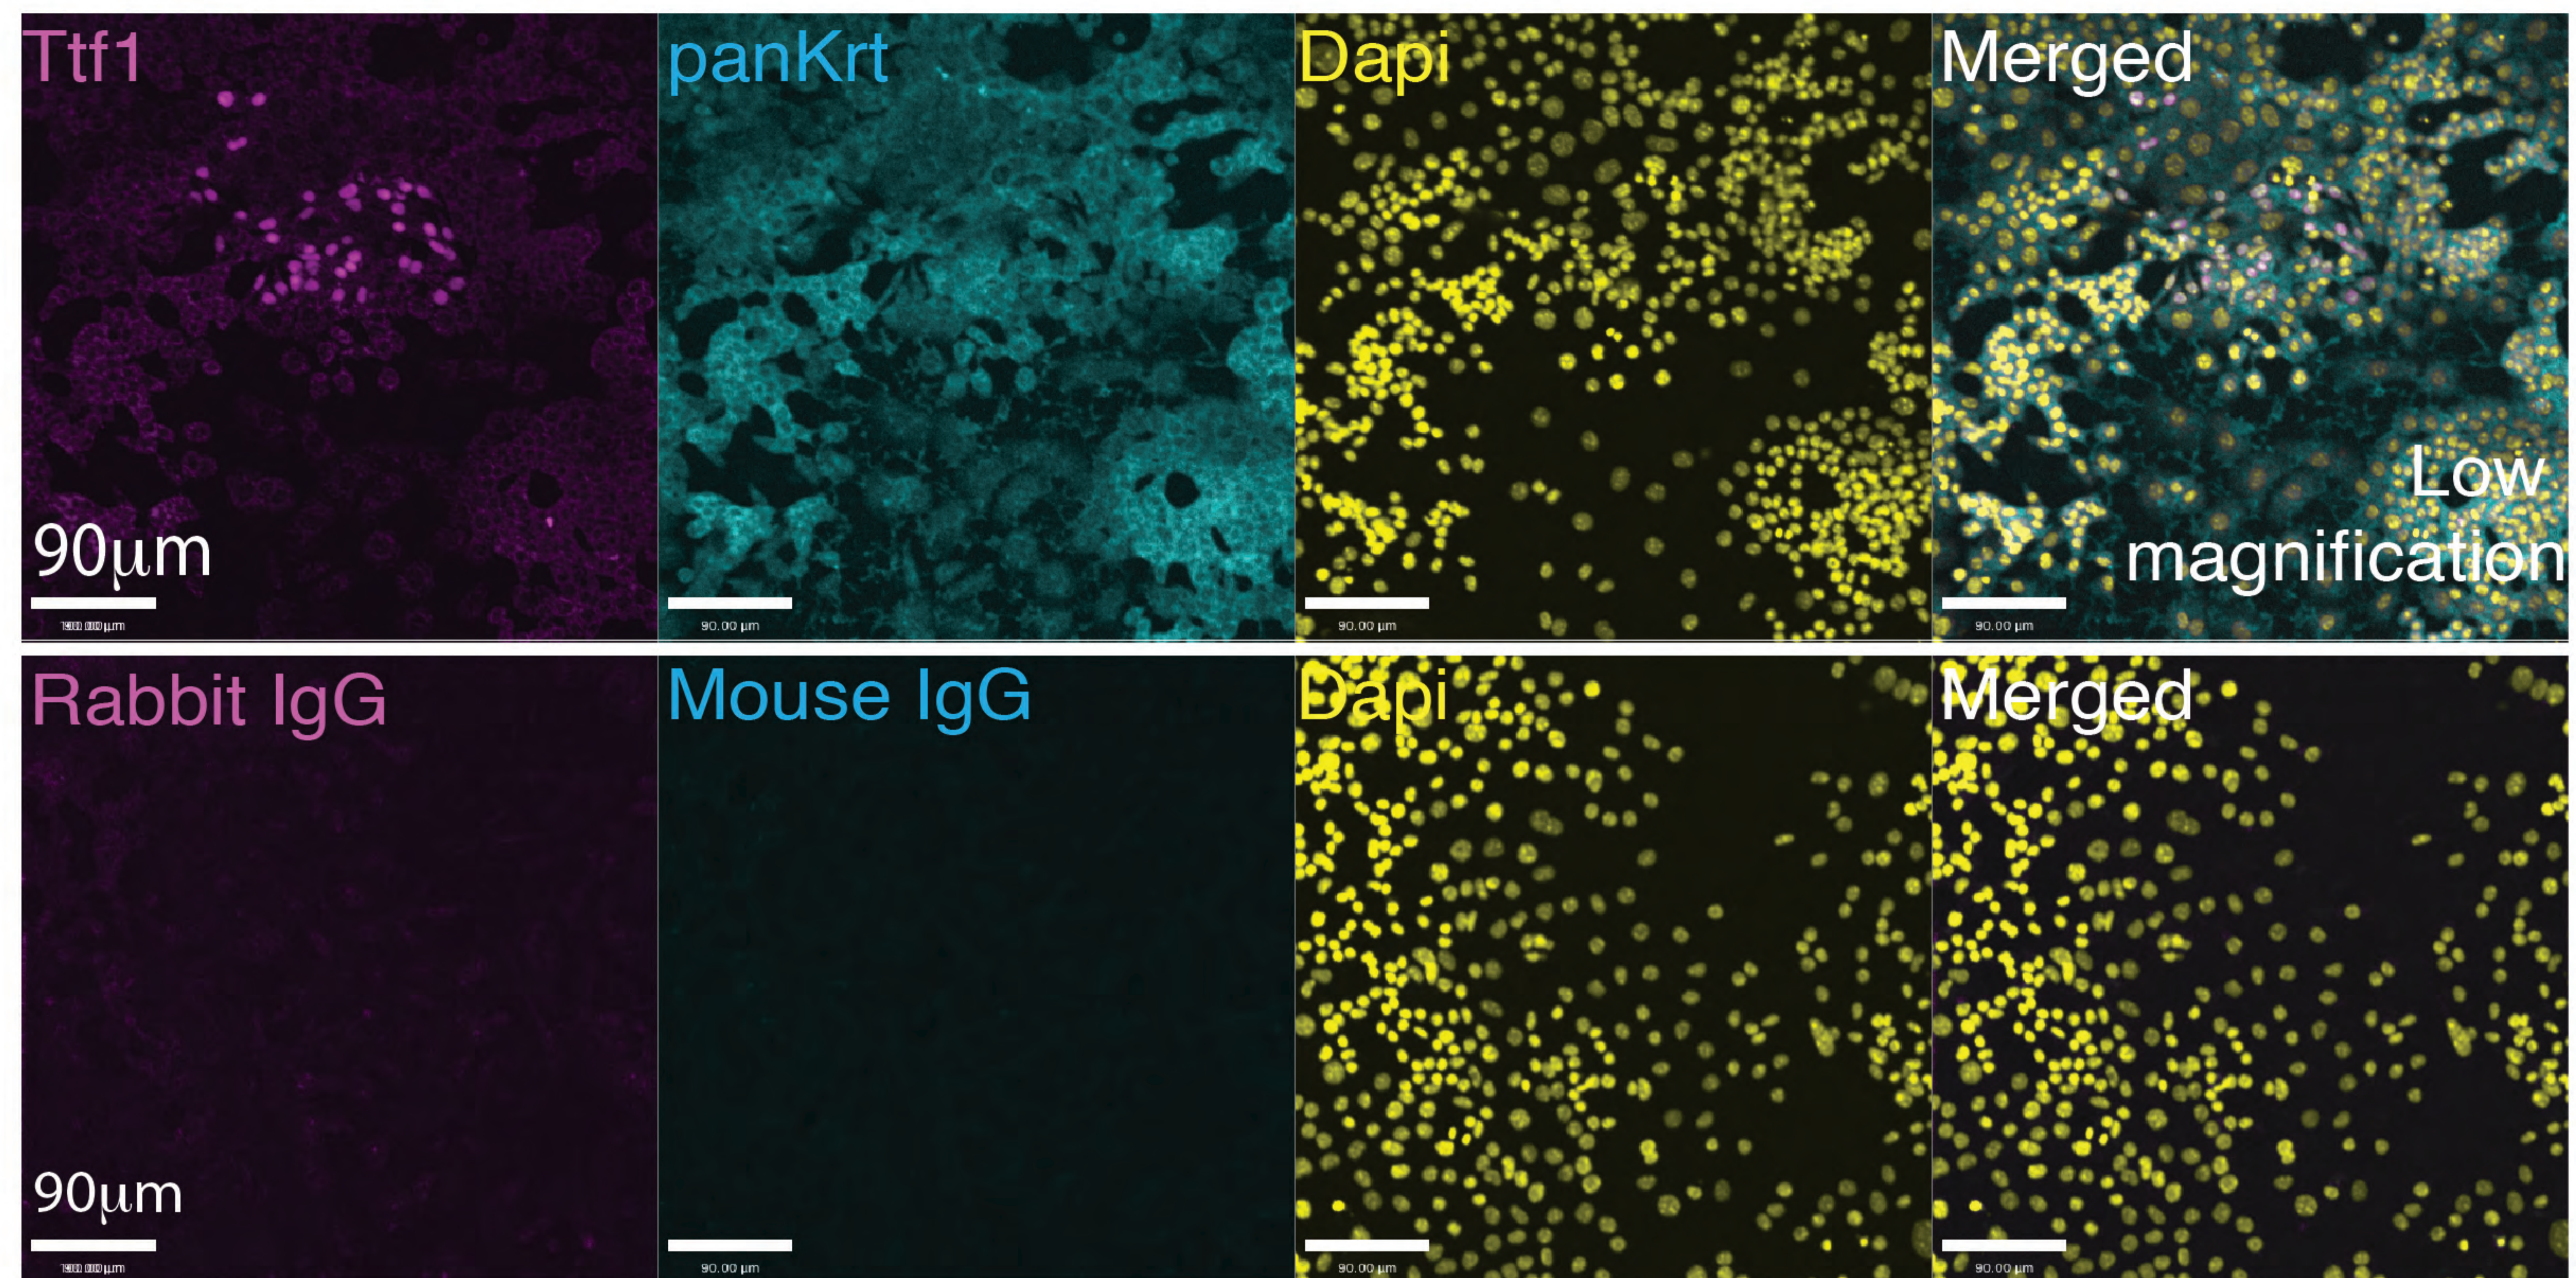

**b**

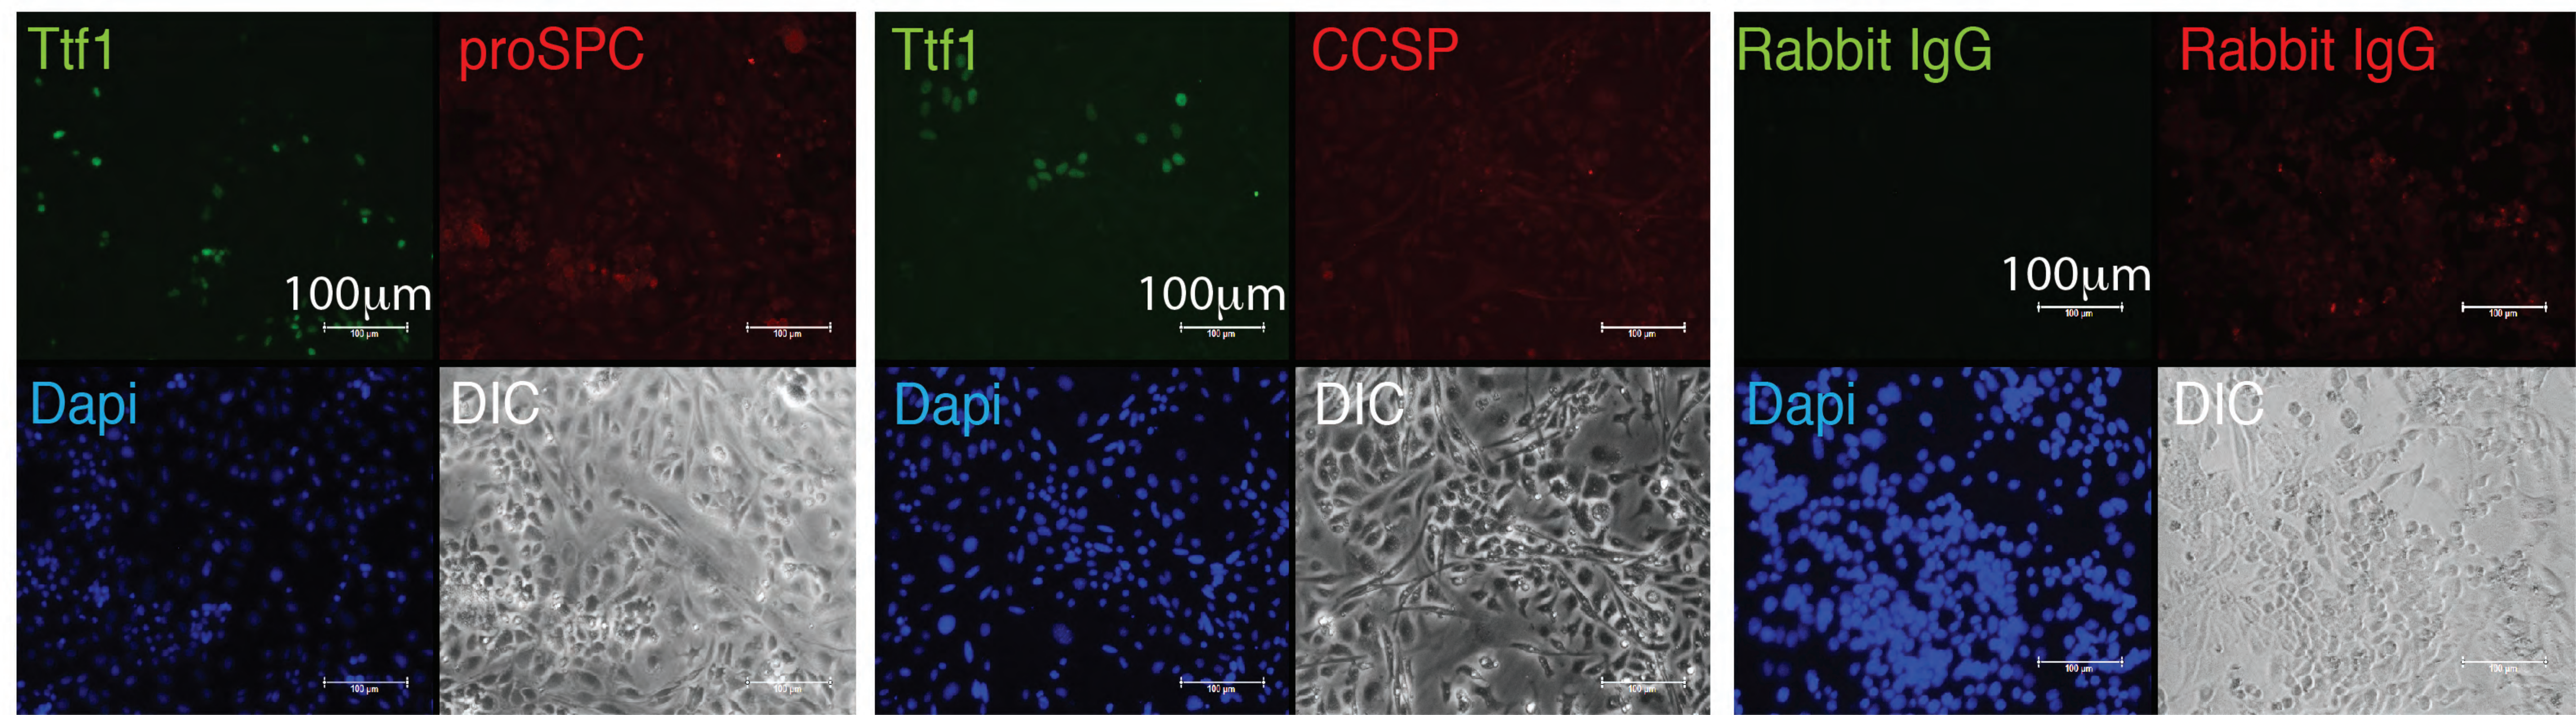

Supplementary Fig 4

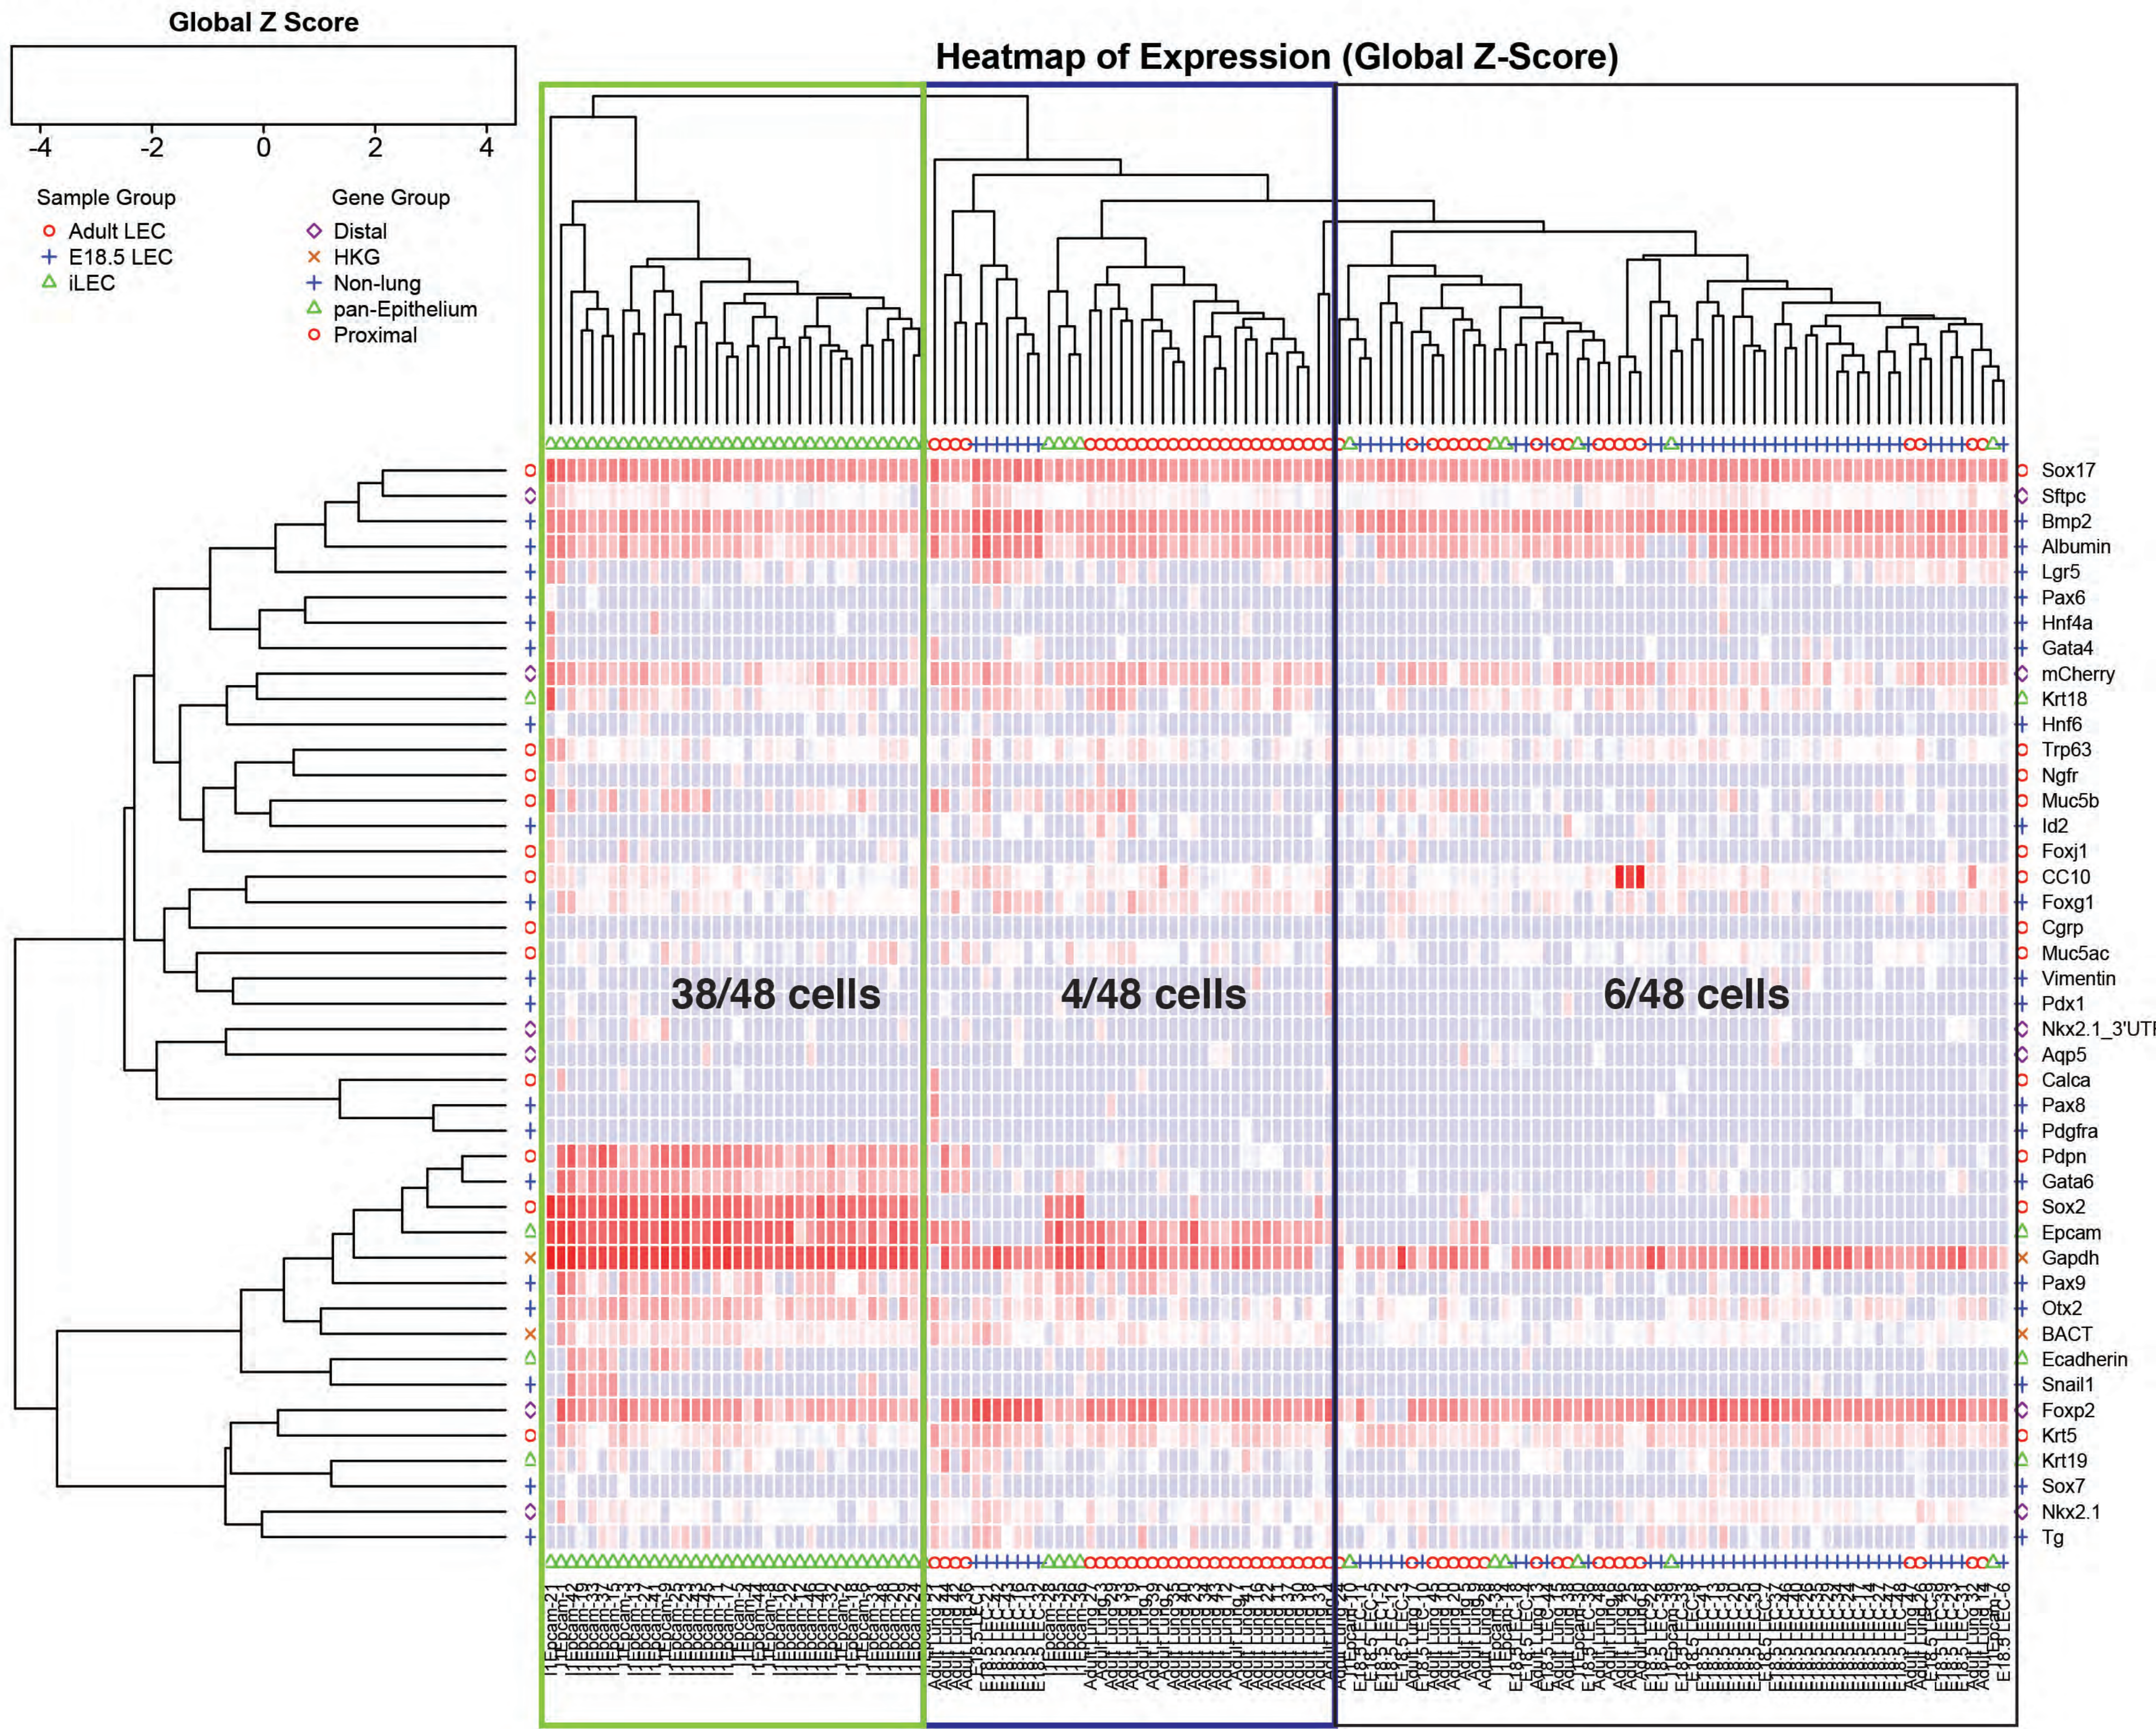

Supplementary Fig 5

a

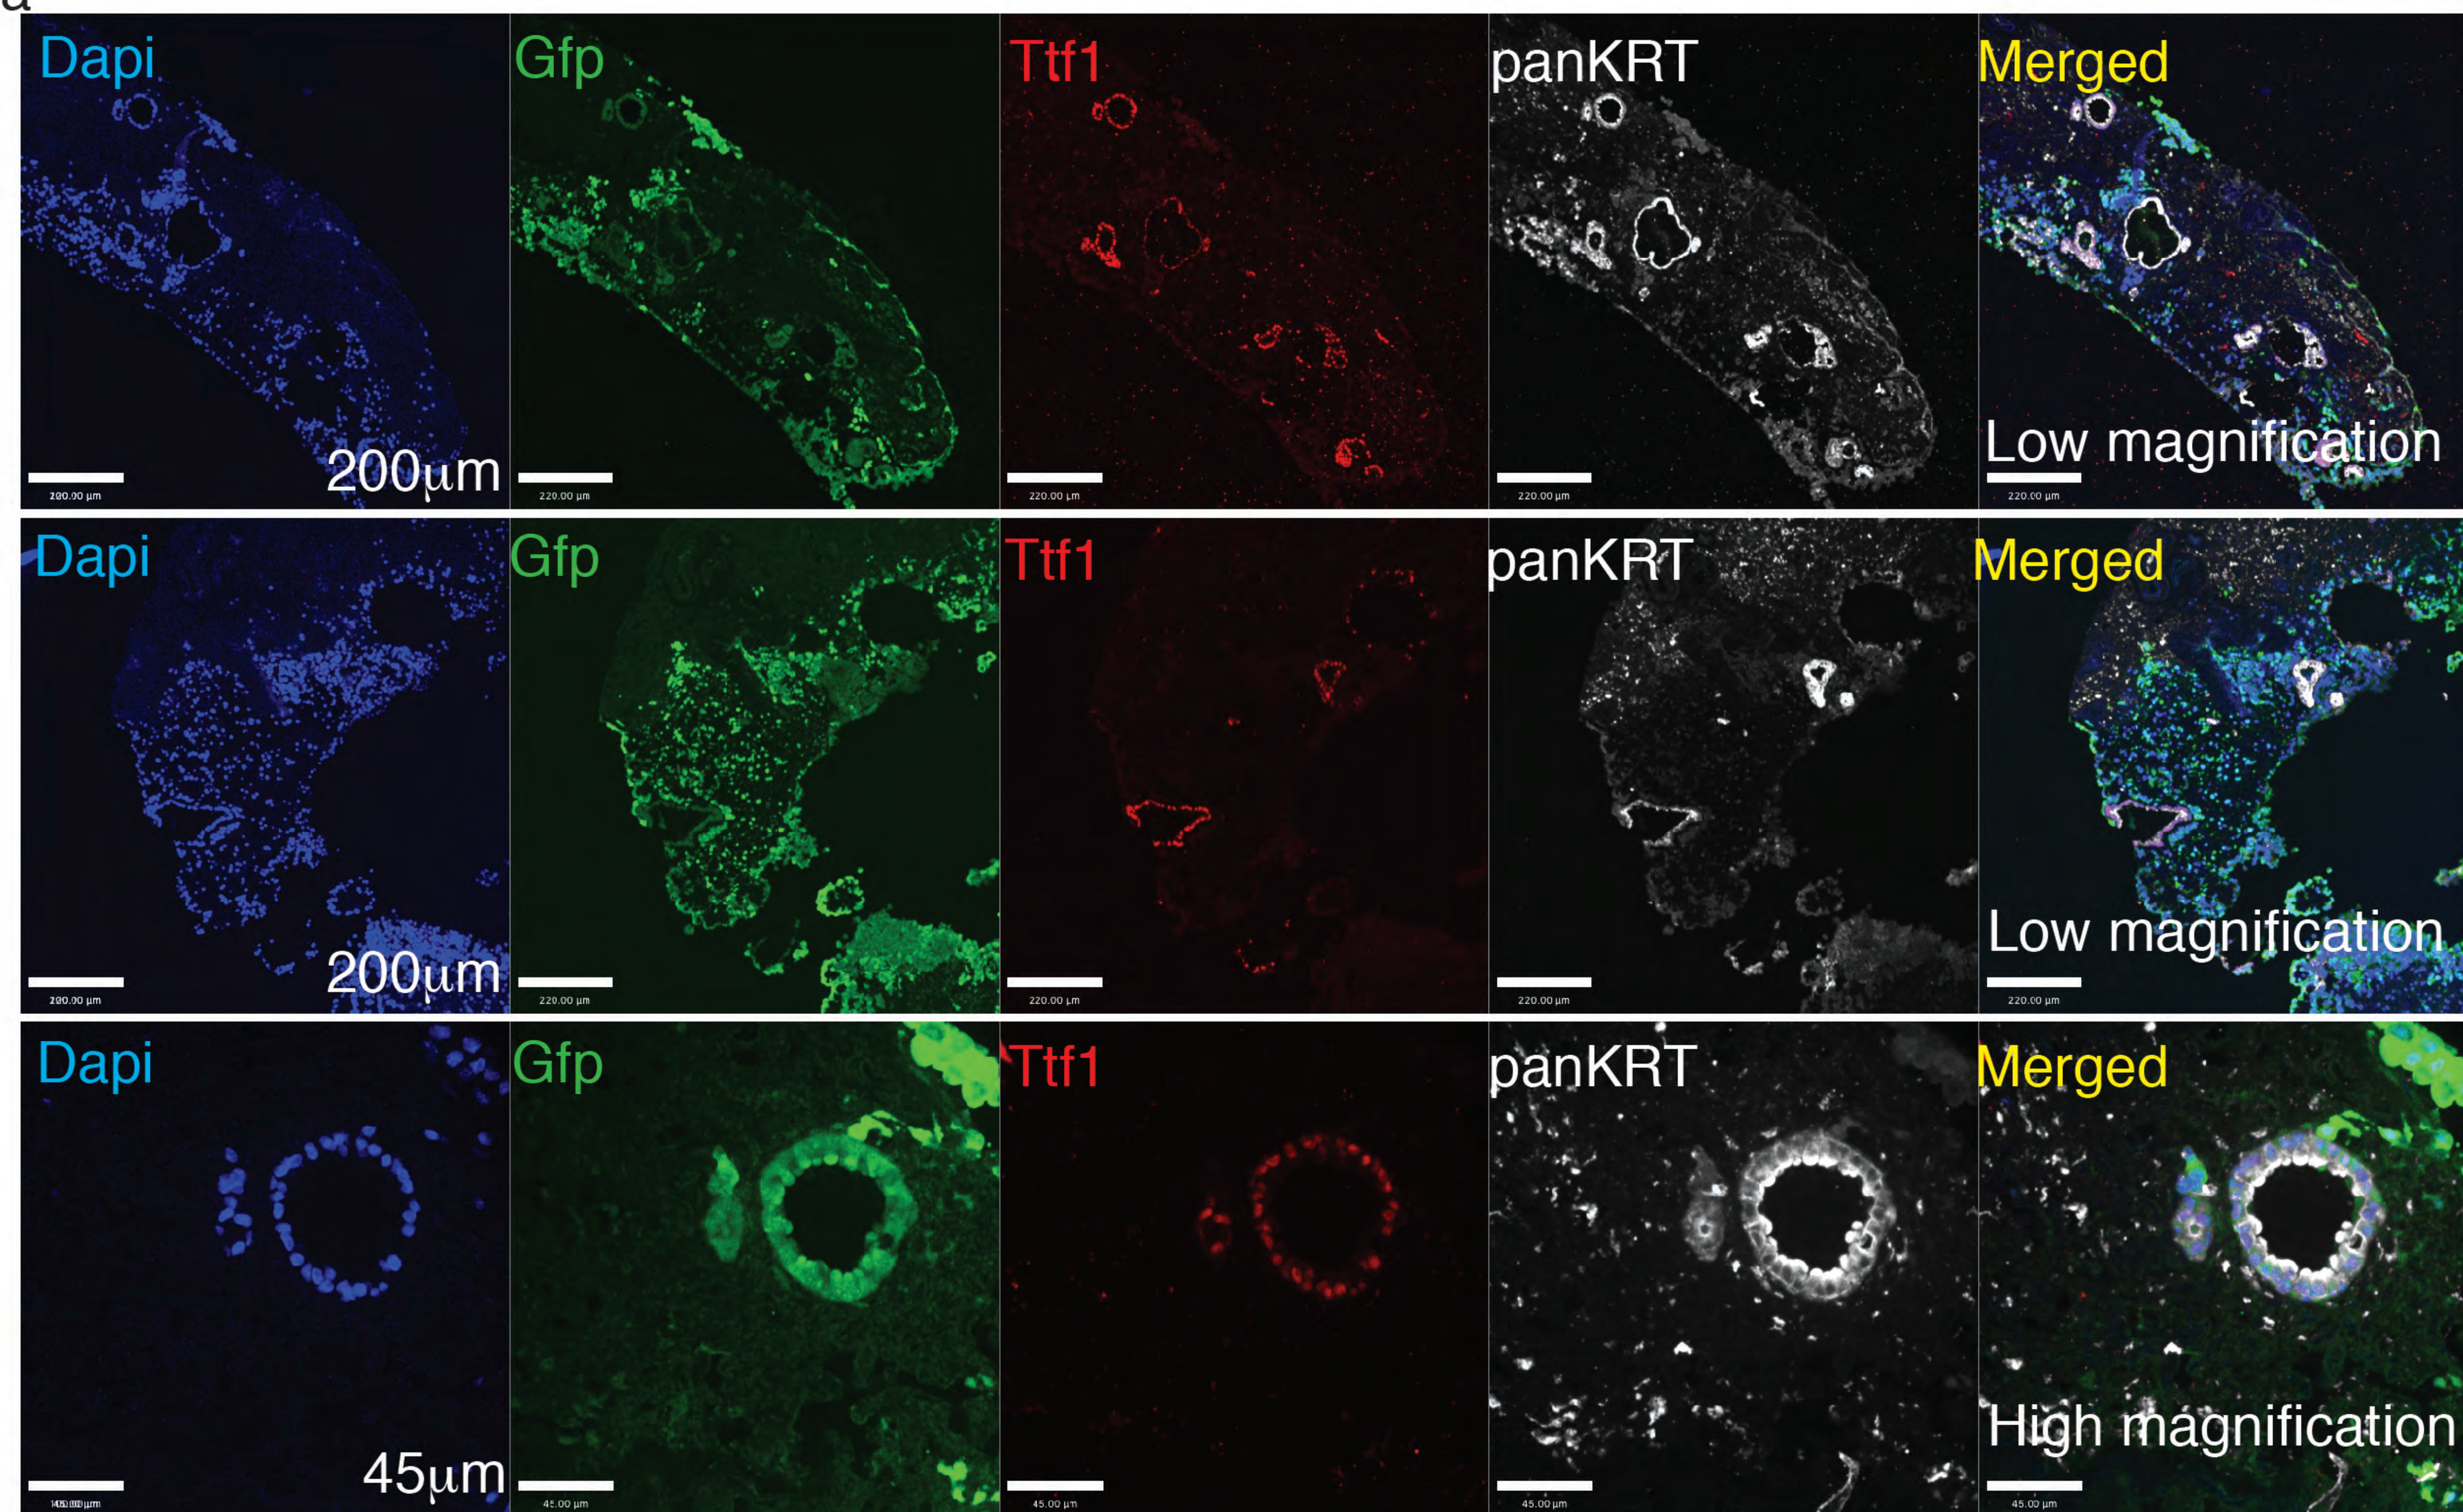

b

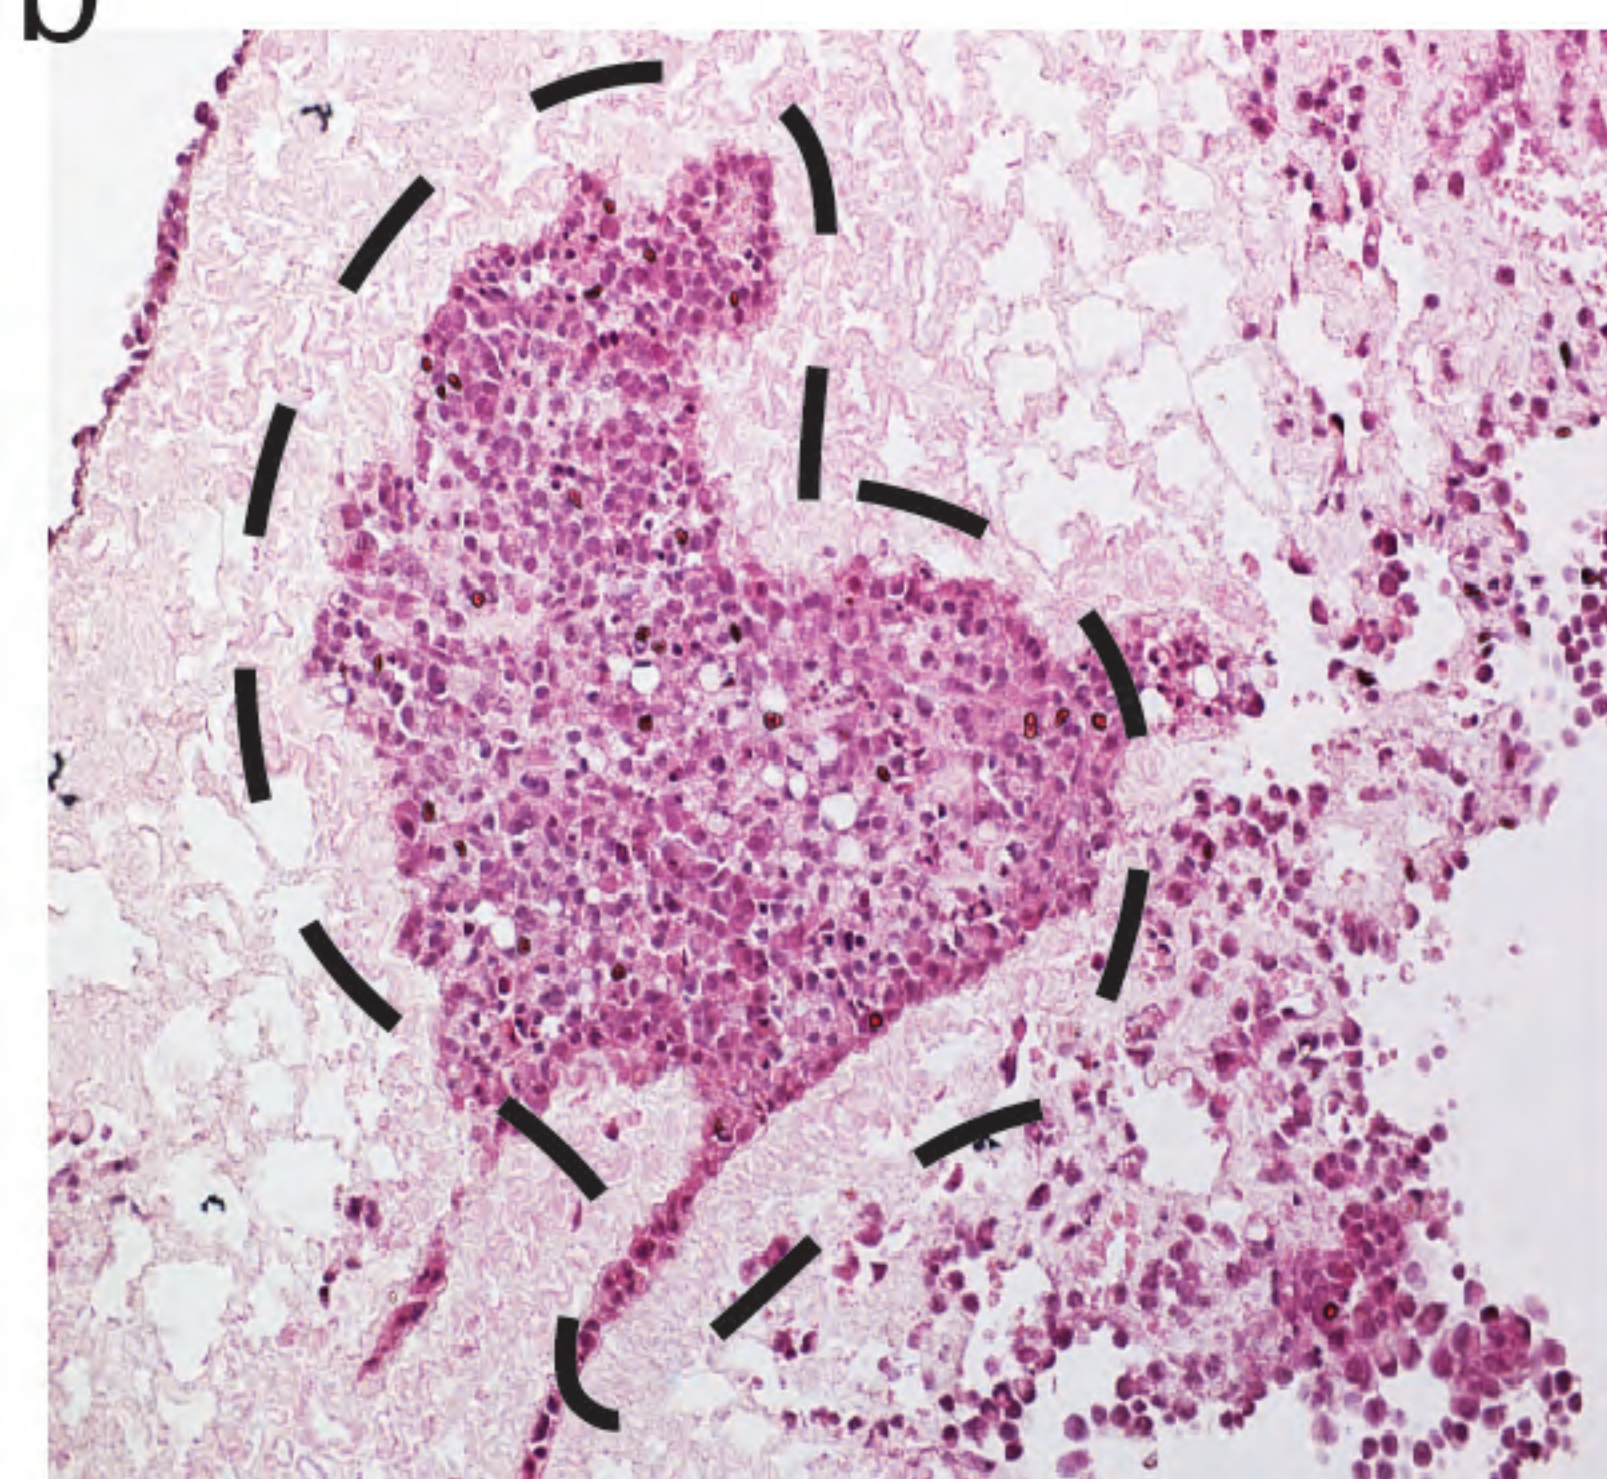

c

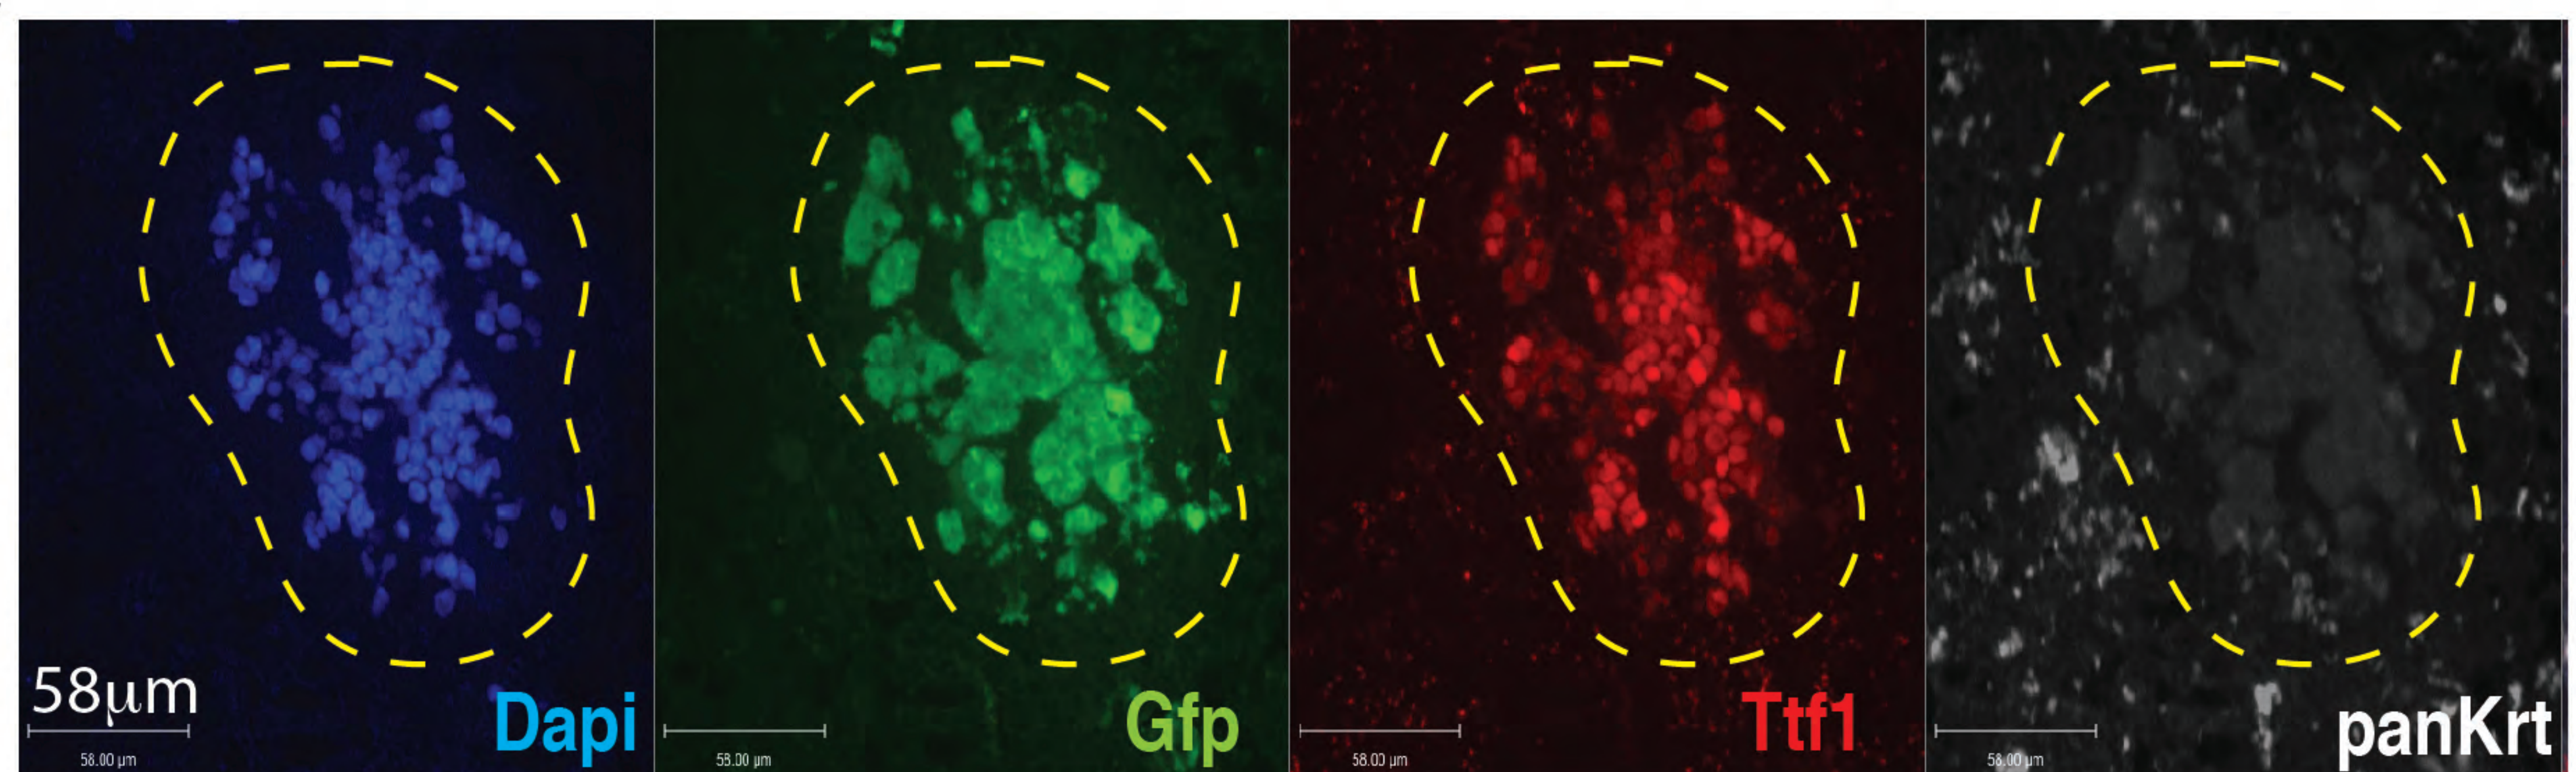

Supplementary Fig 6

R1 ES cells only

a

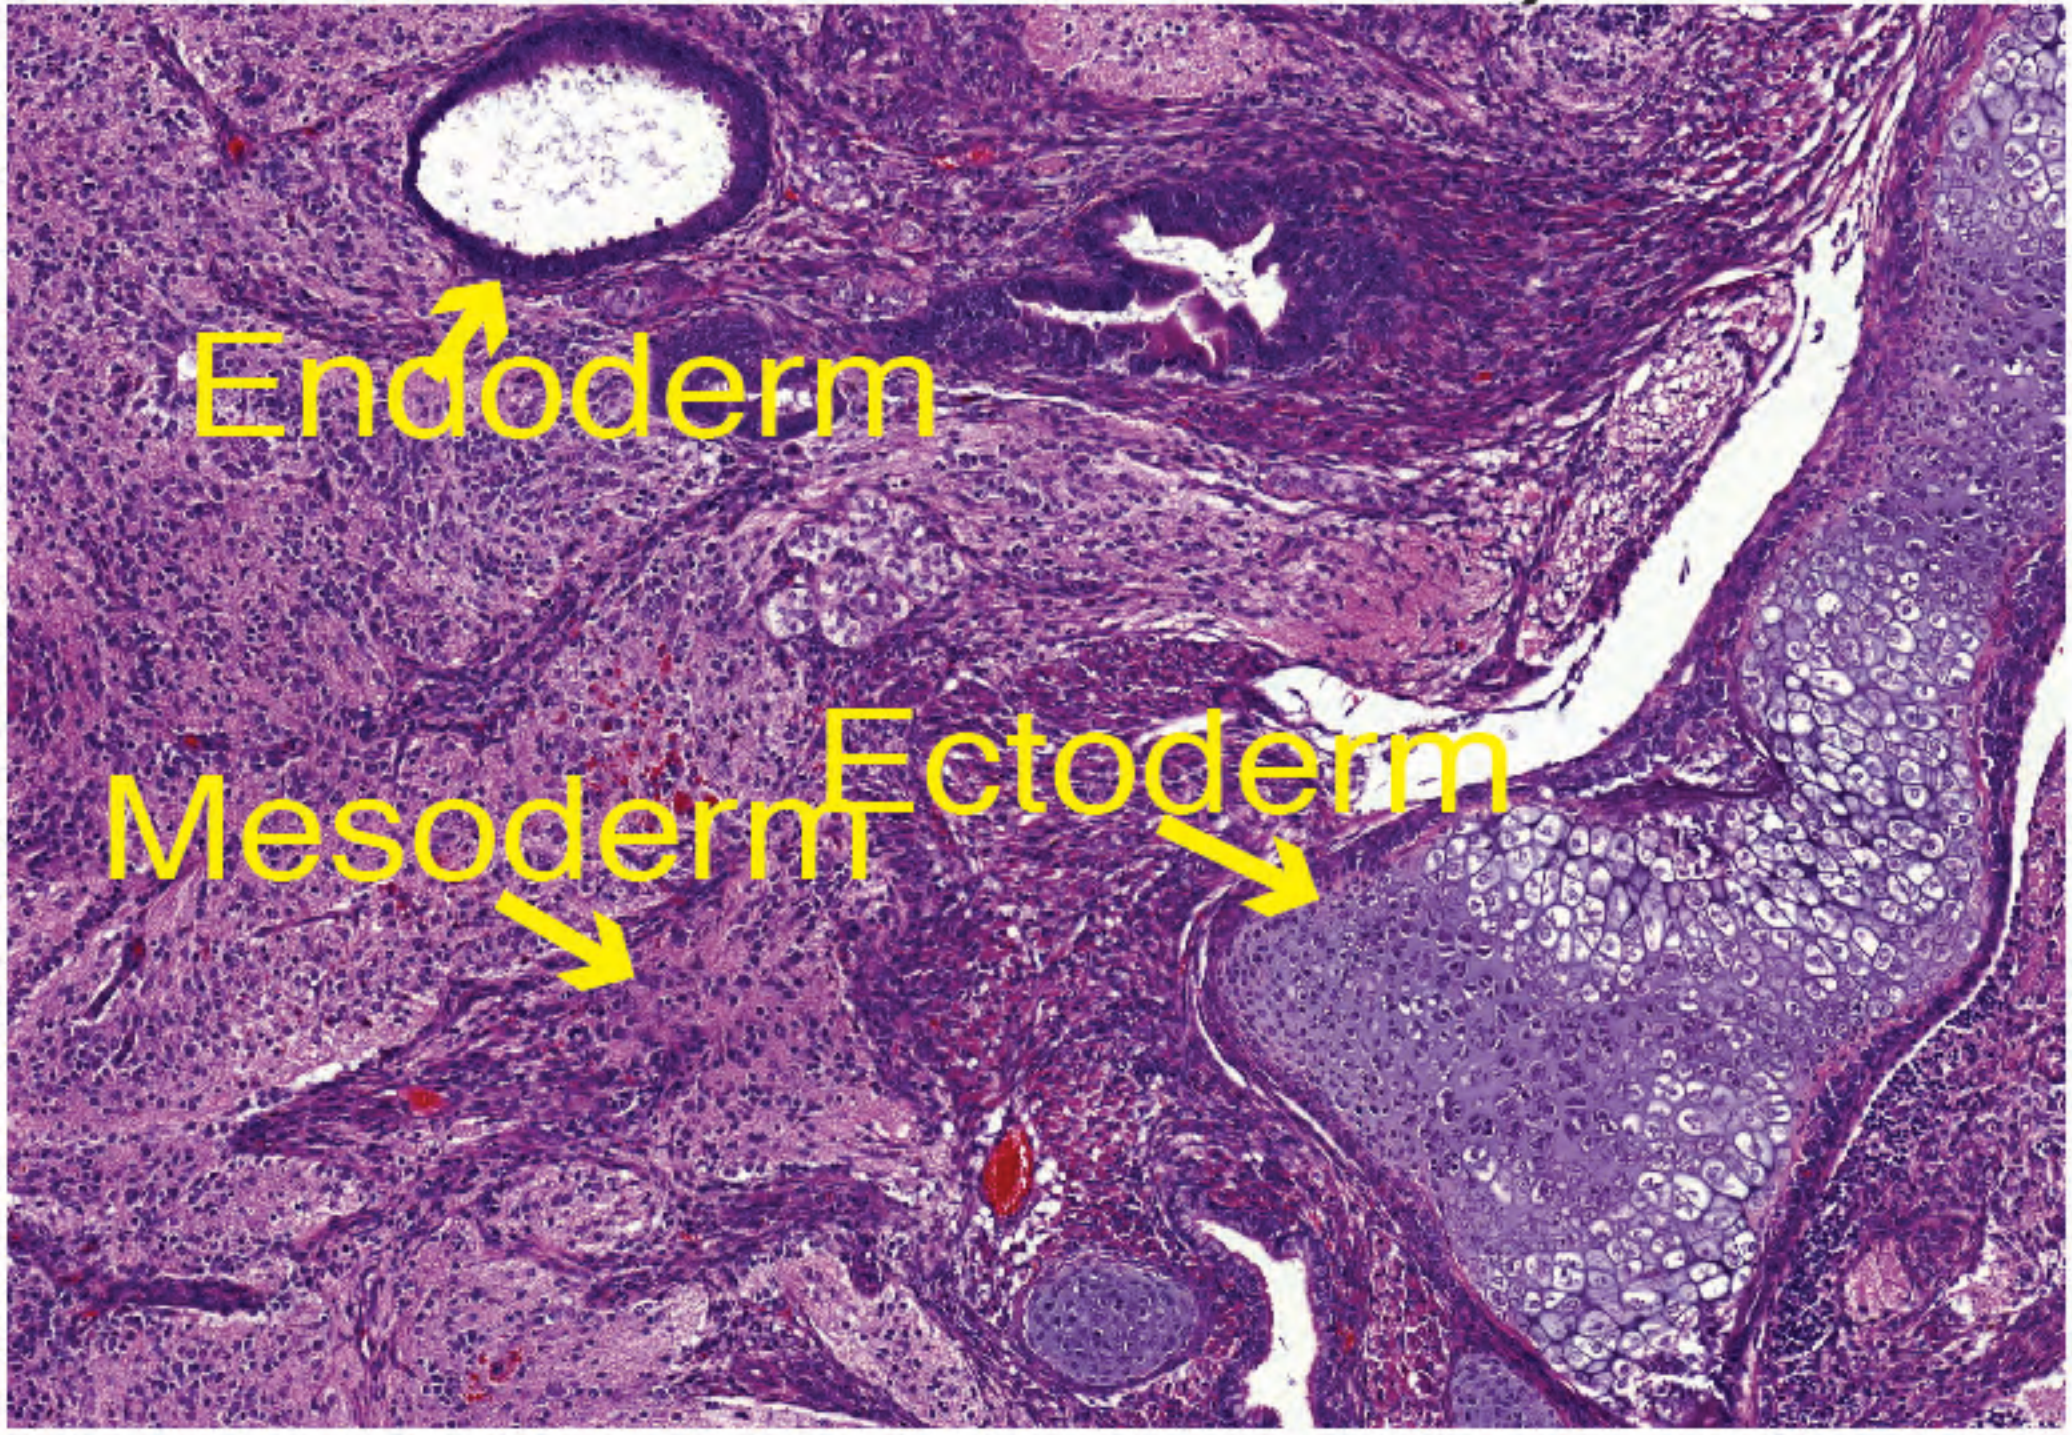

b

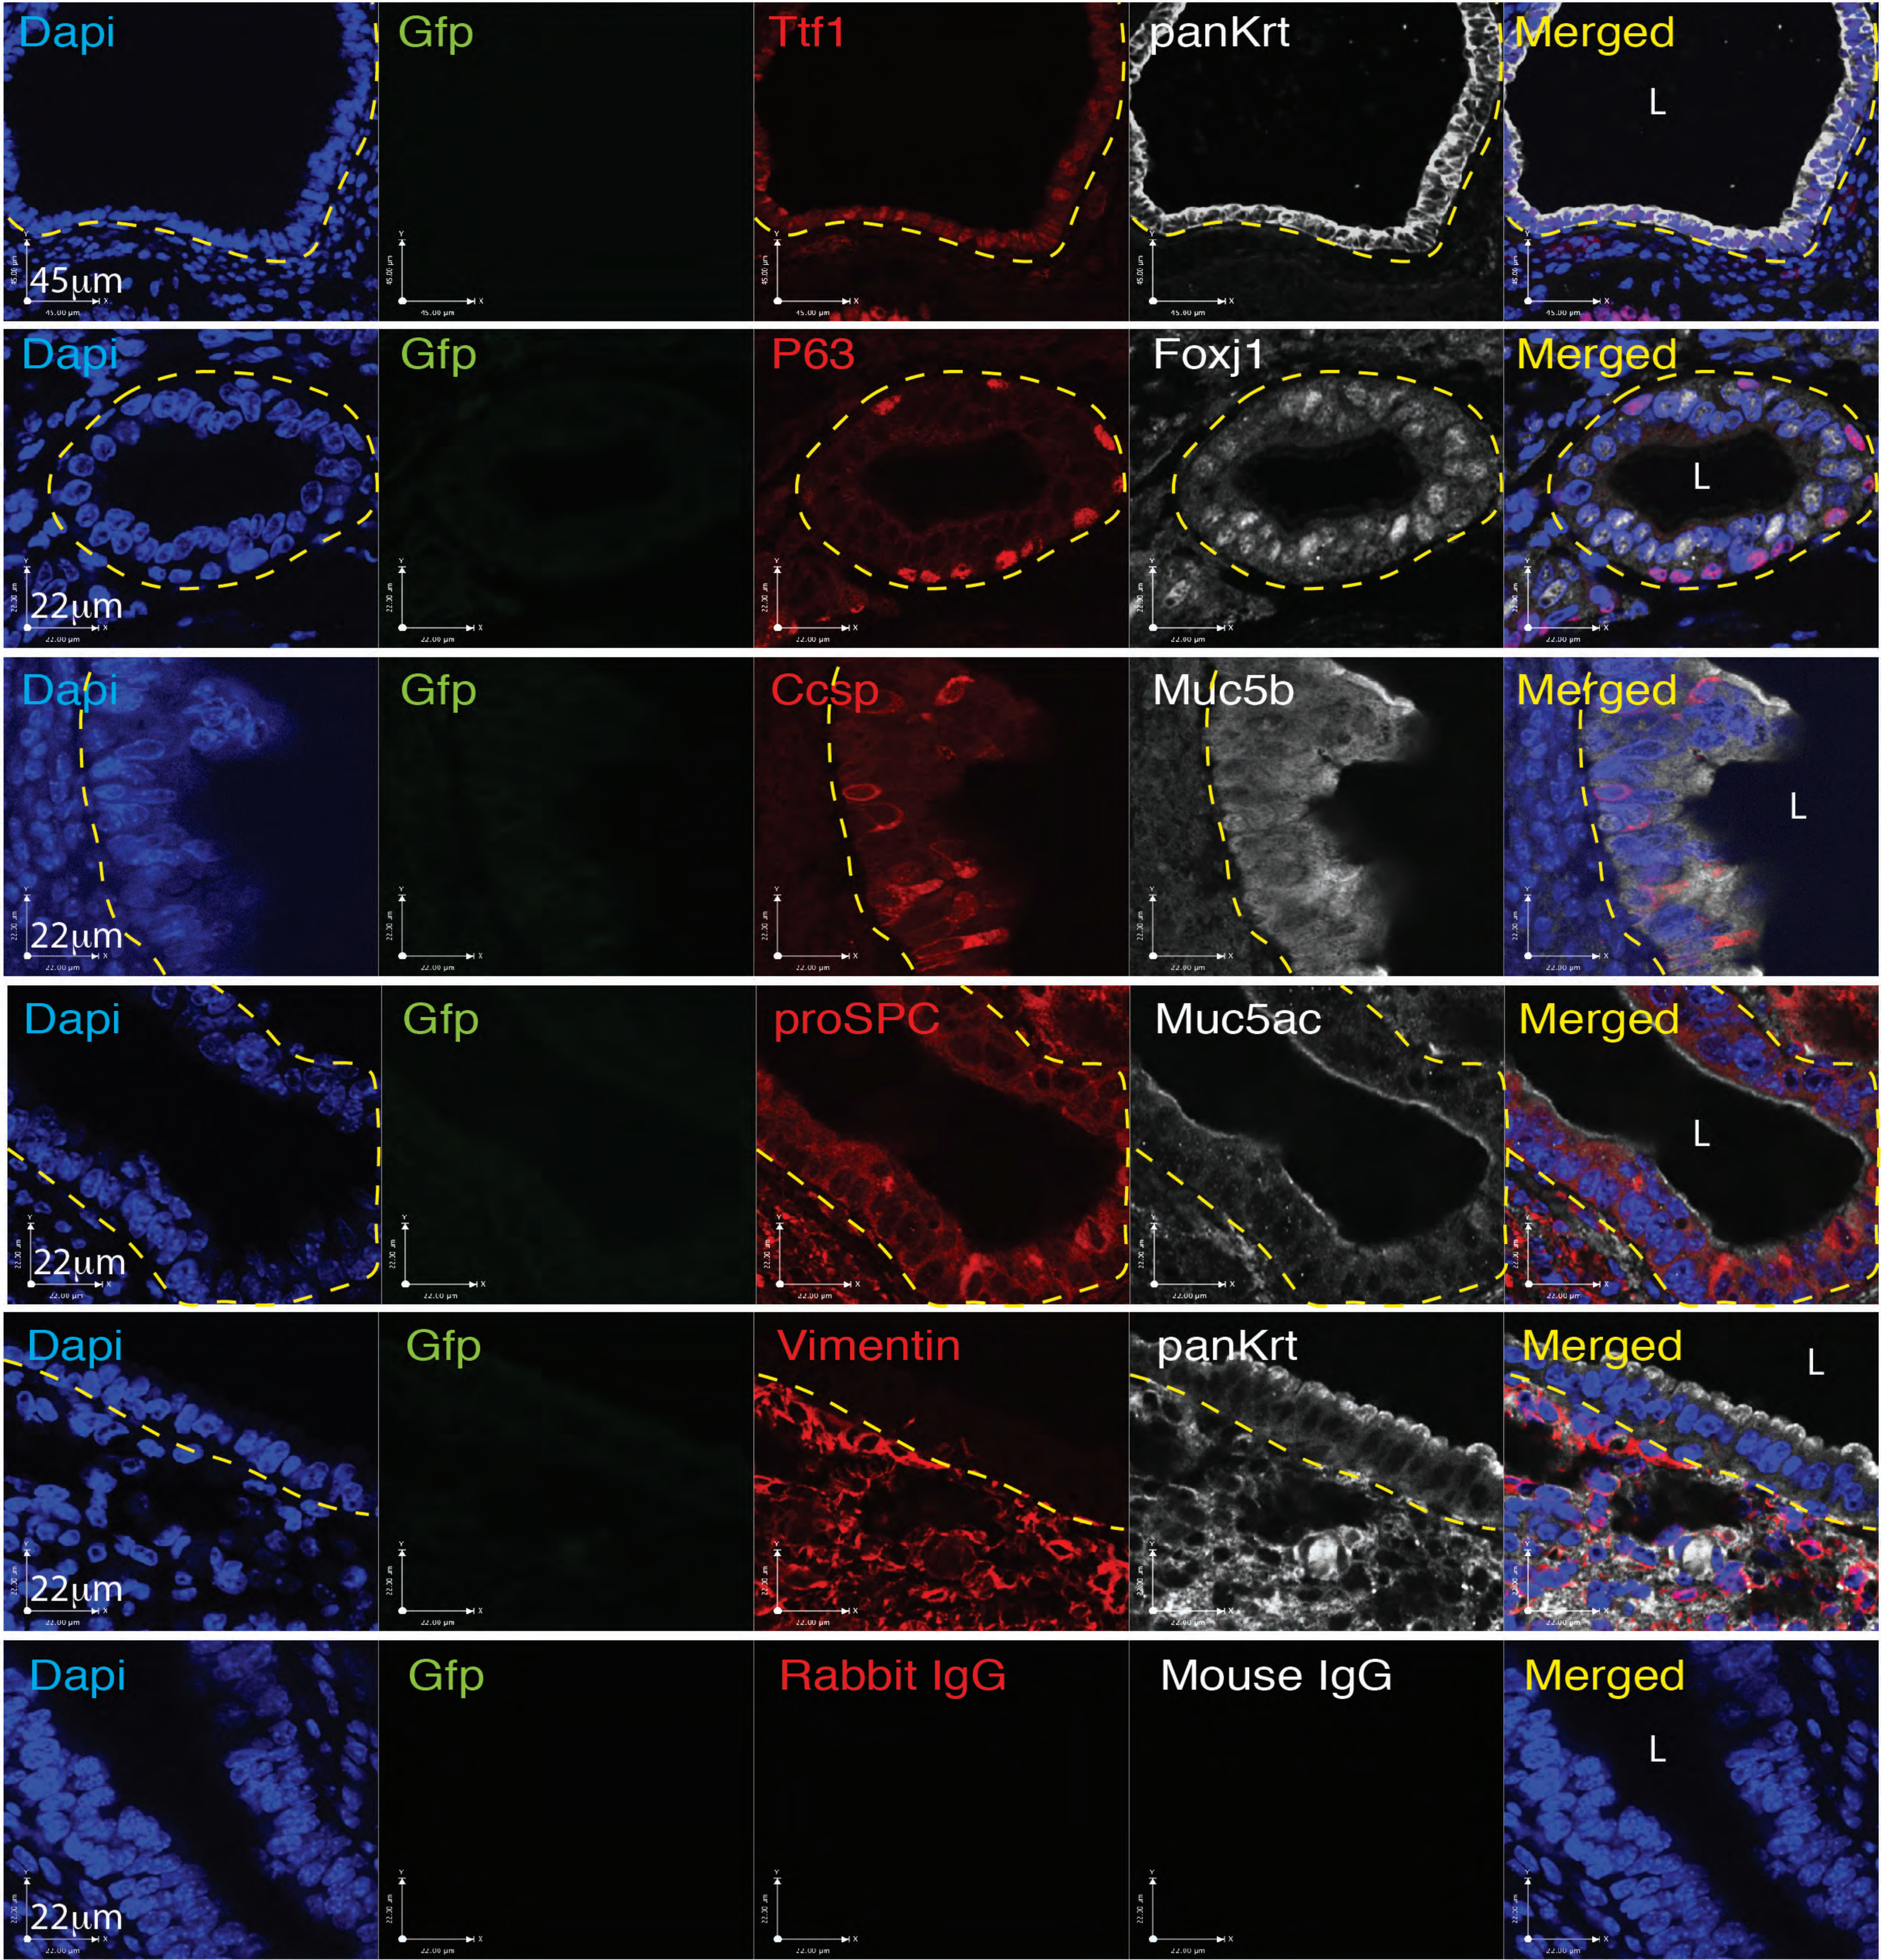

# Mouse lung control

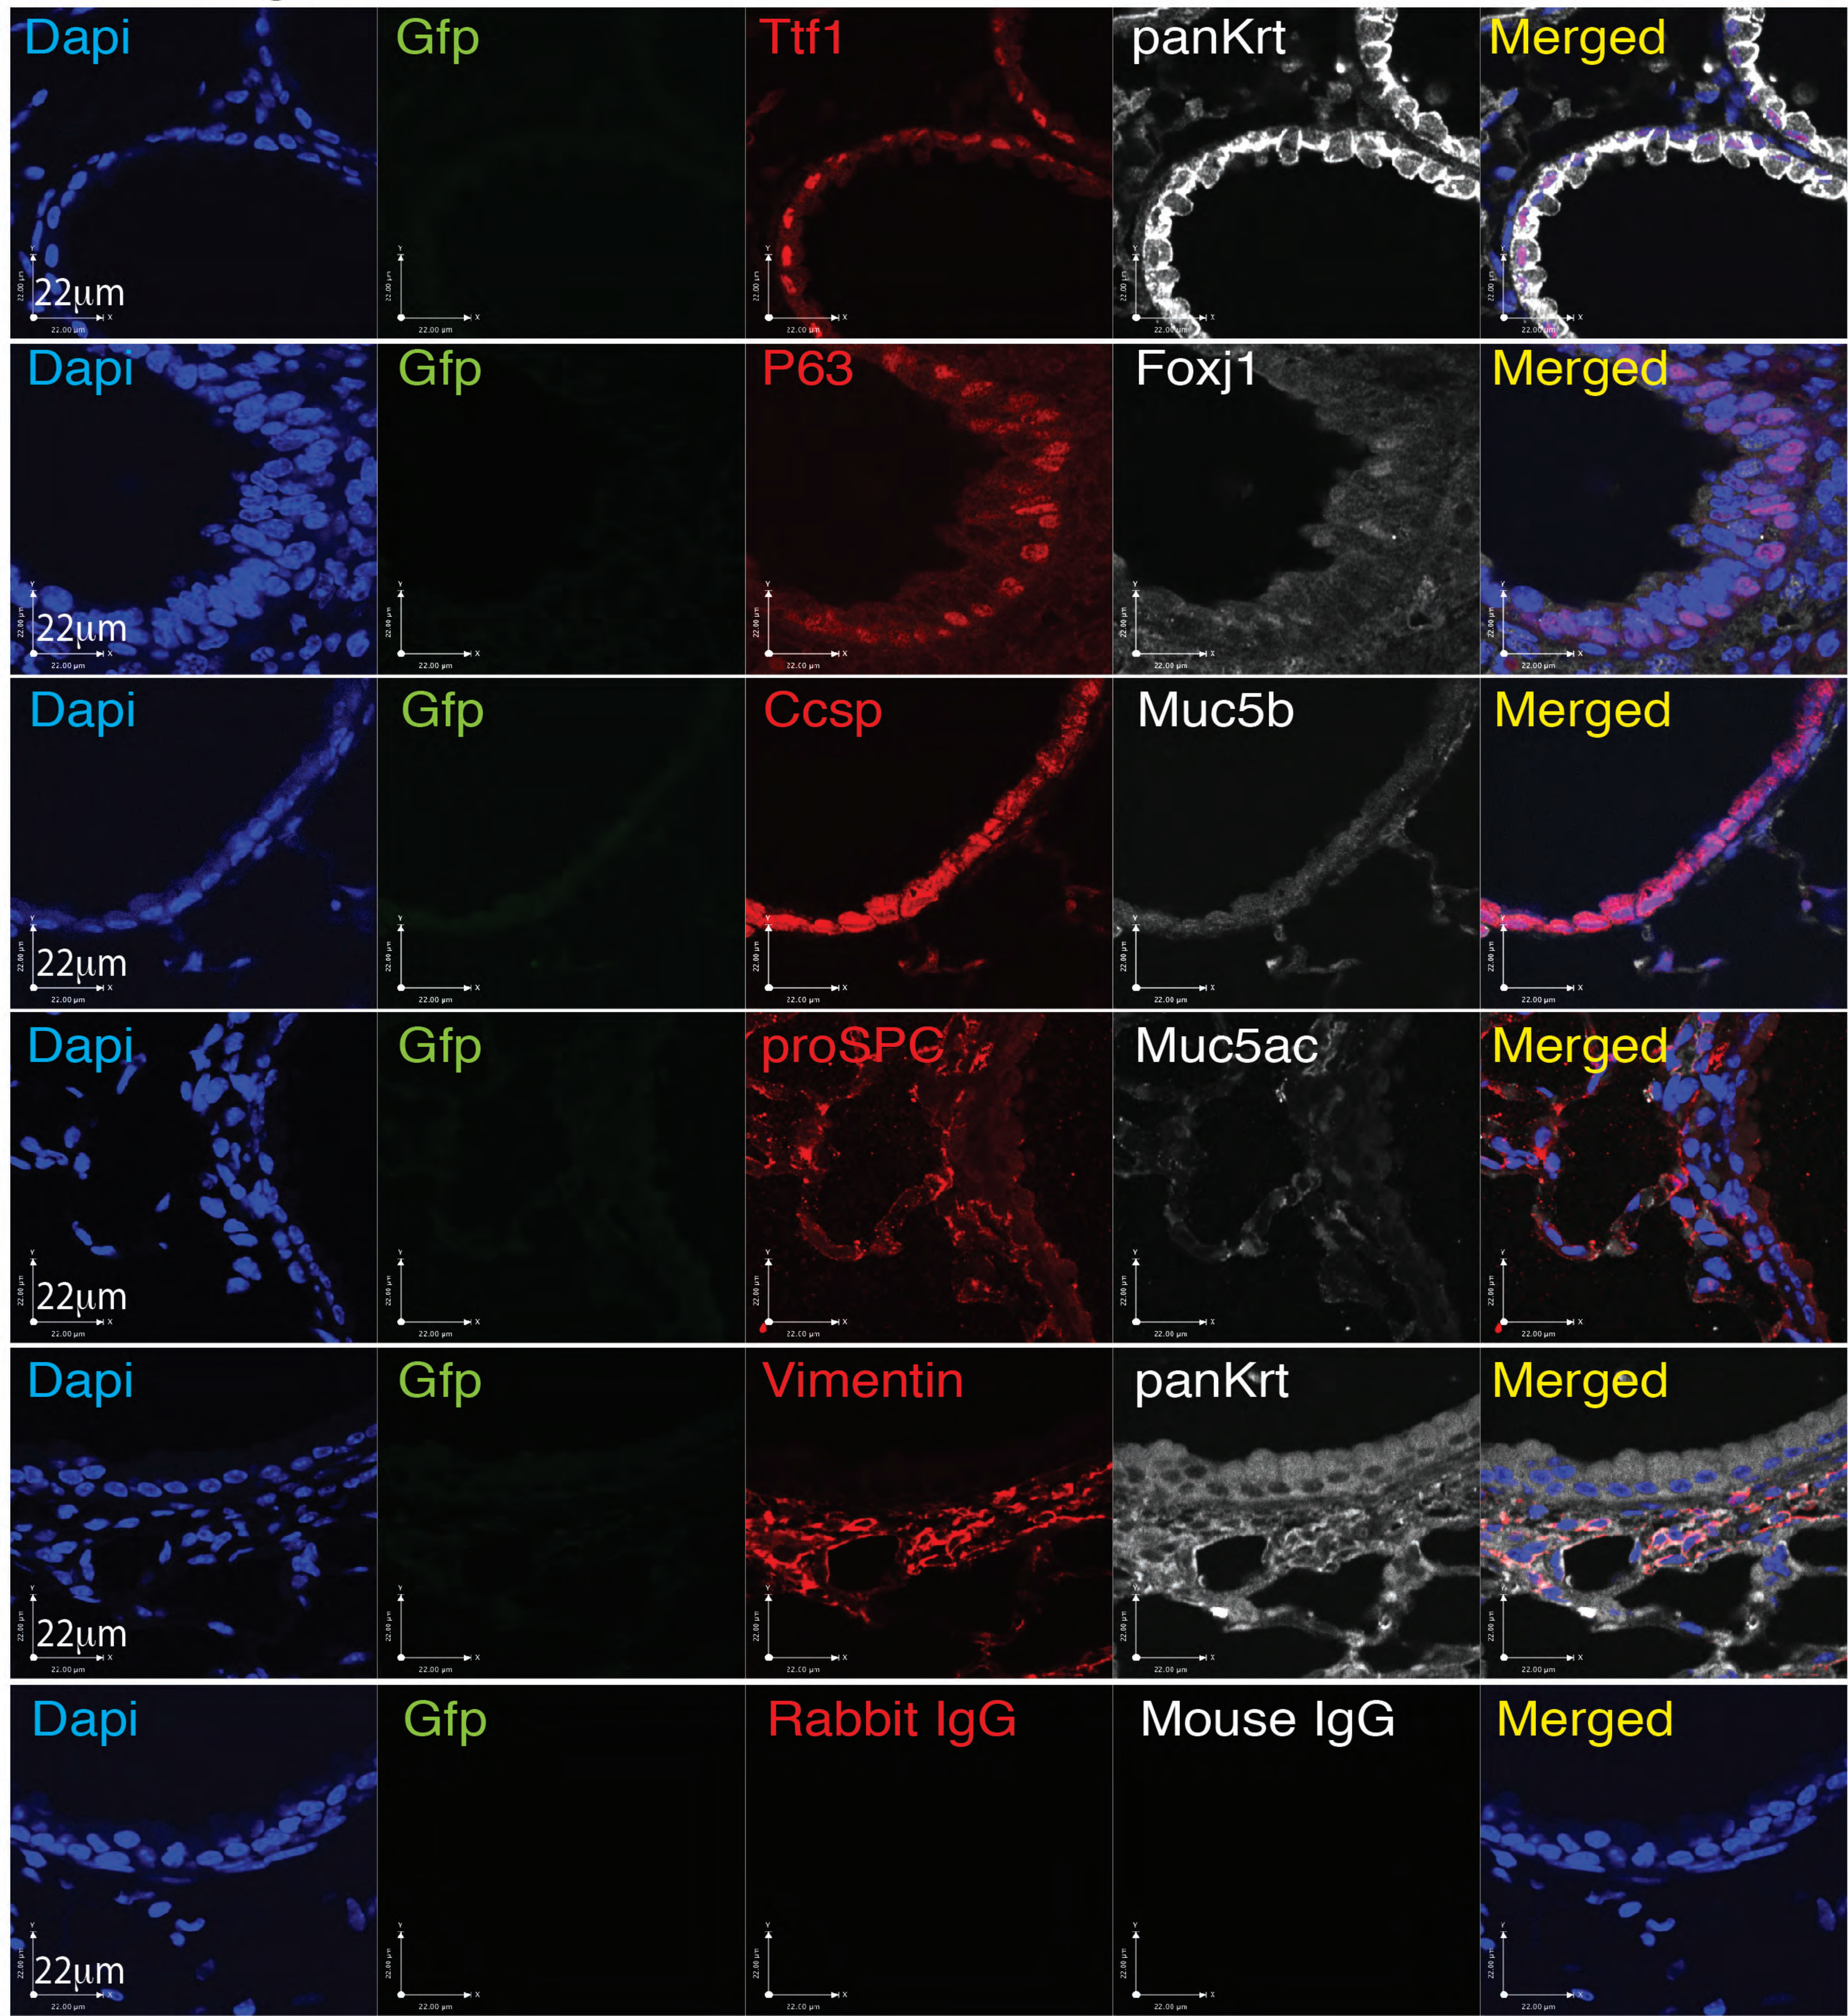

Supplementary Fig 8

a

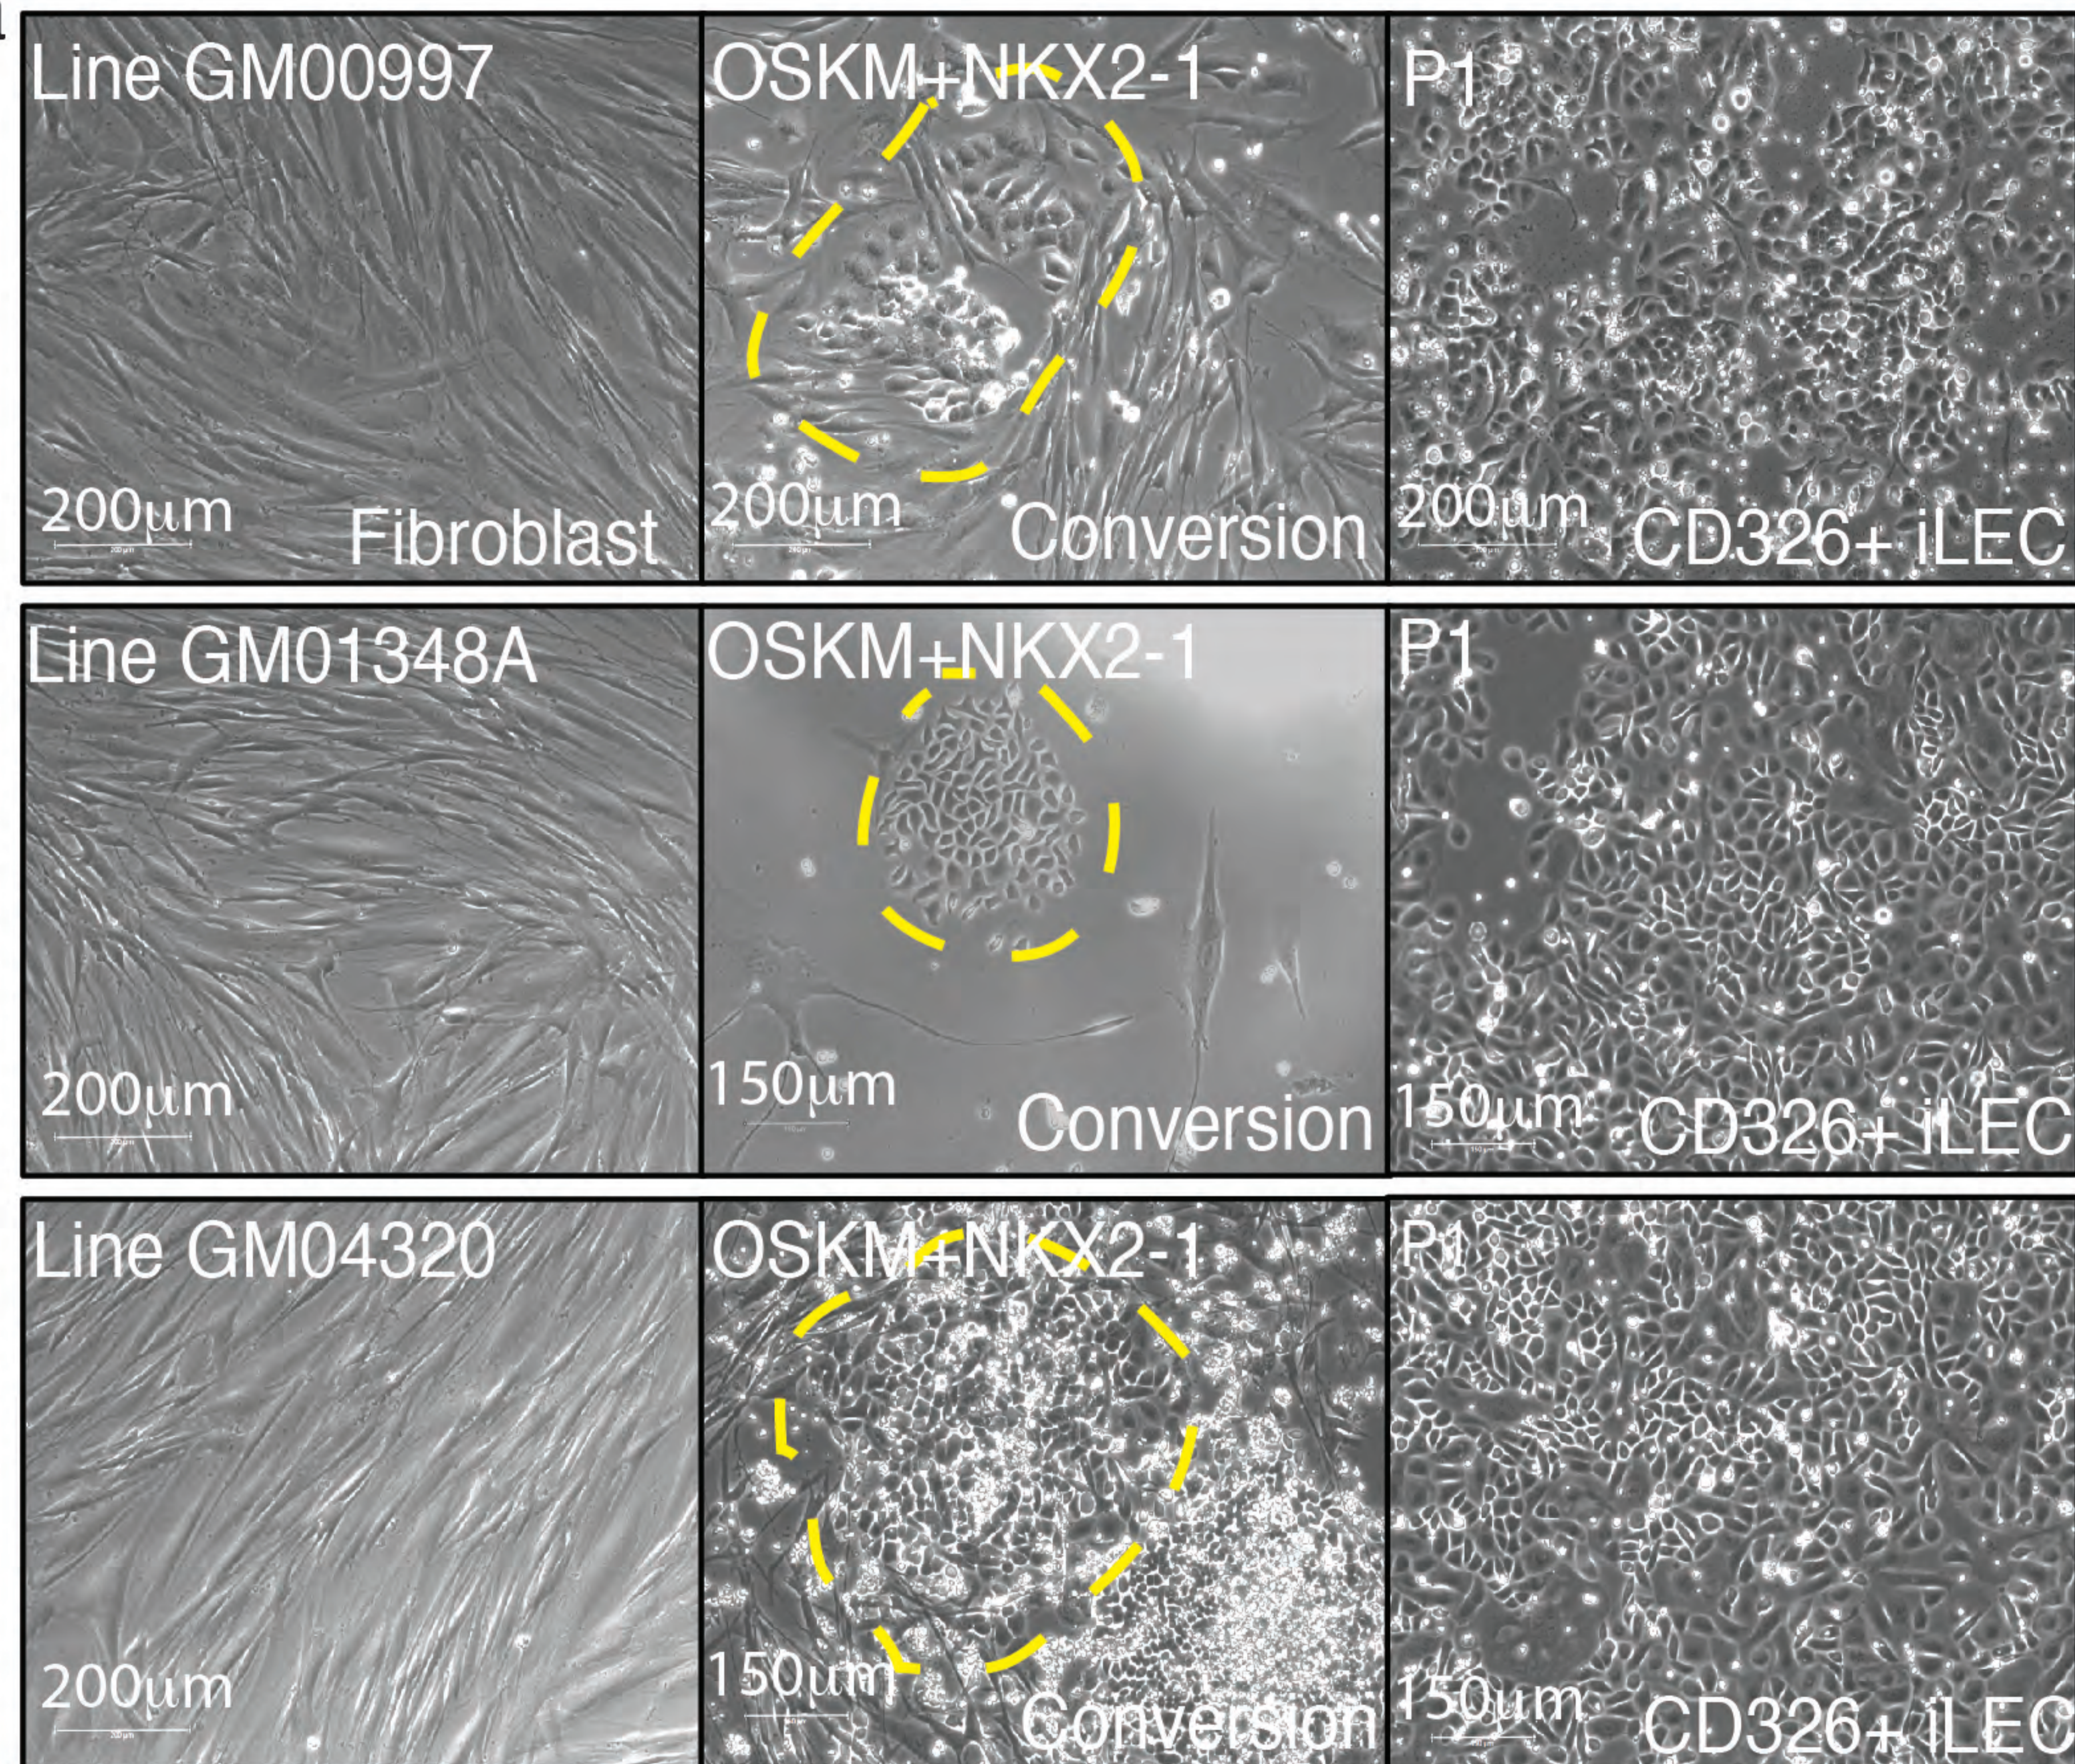

b

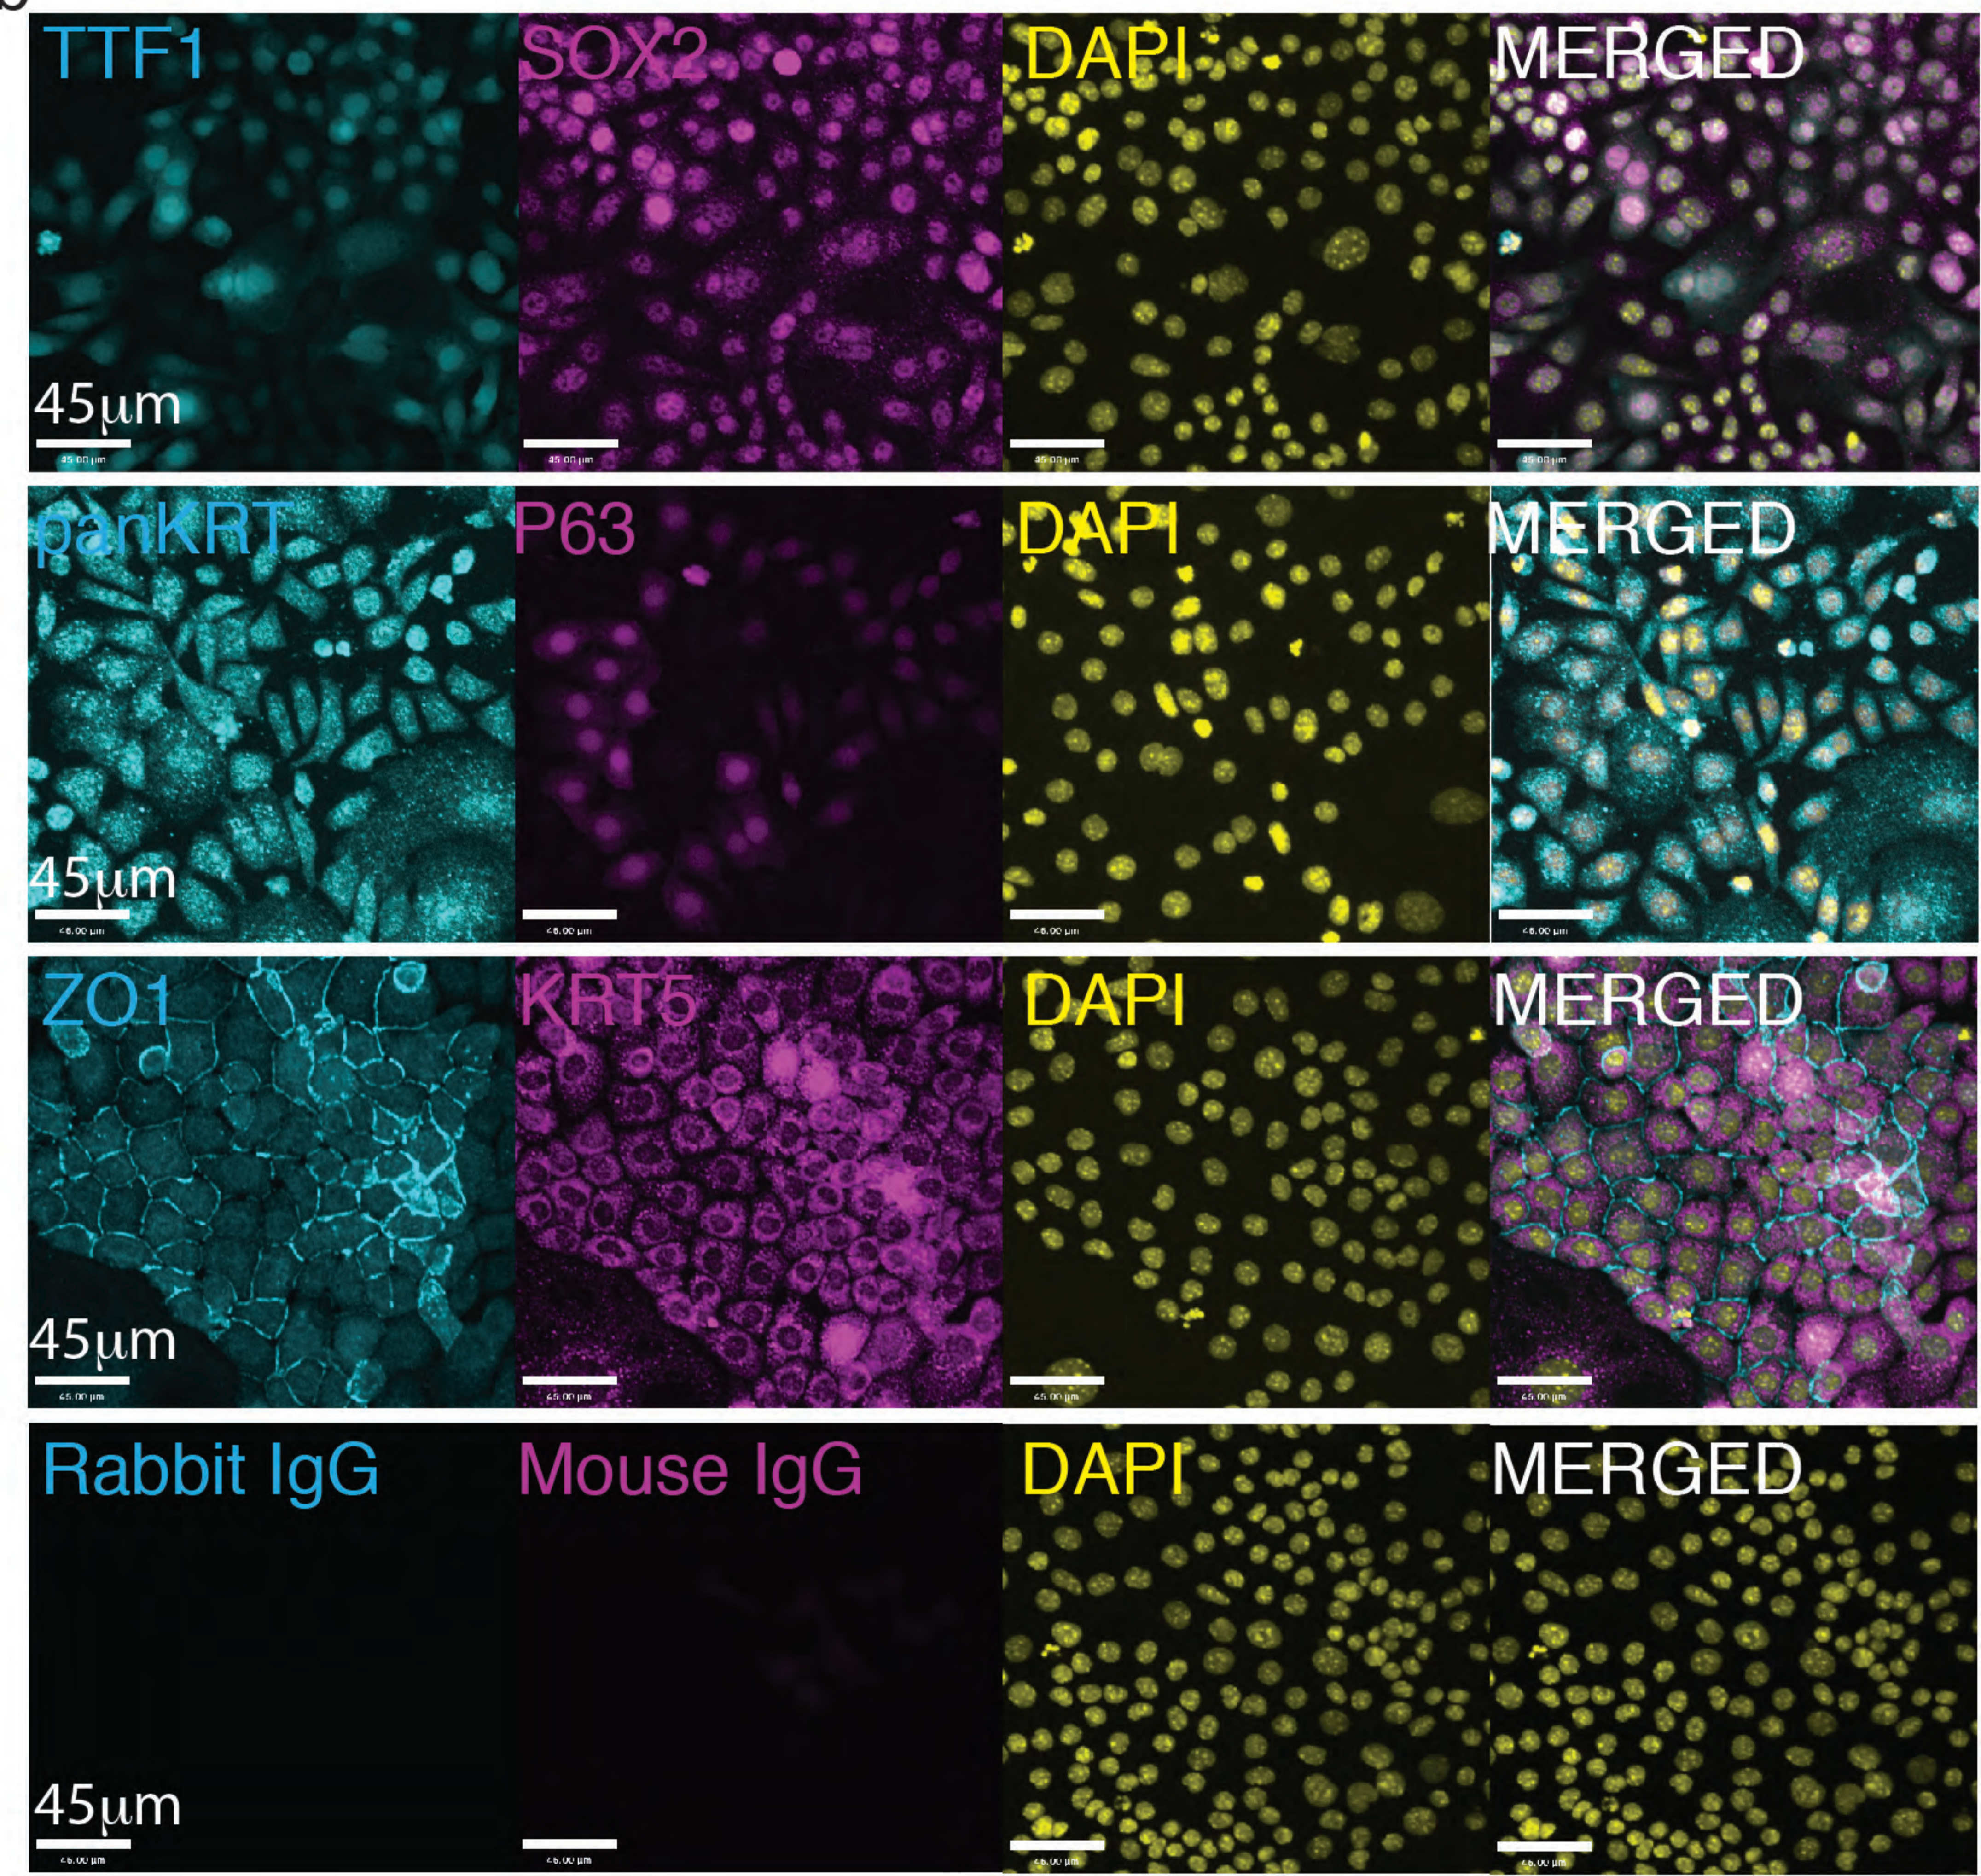

Supplementary Fig 9

a

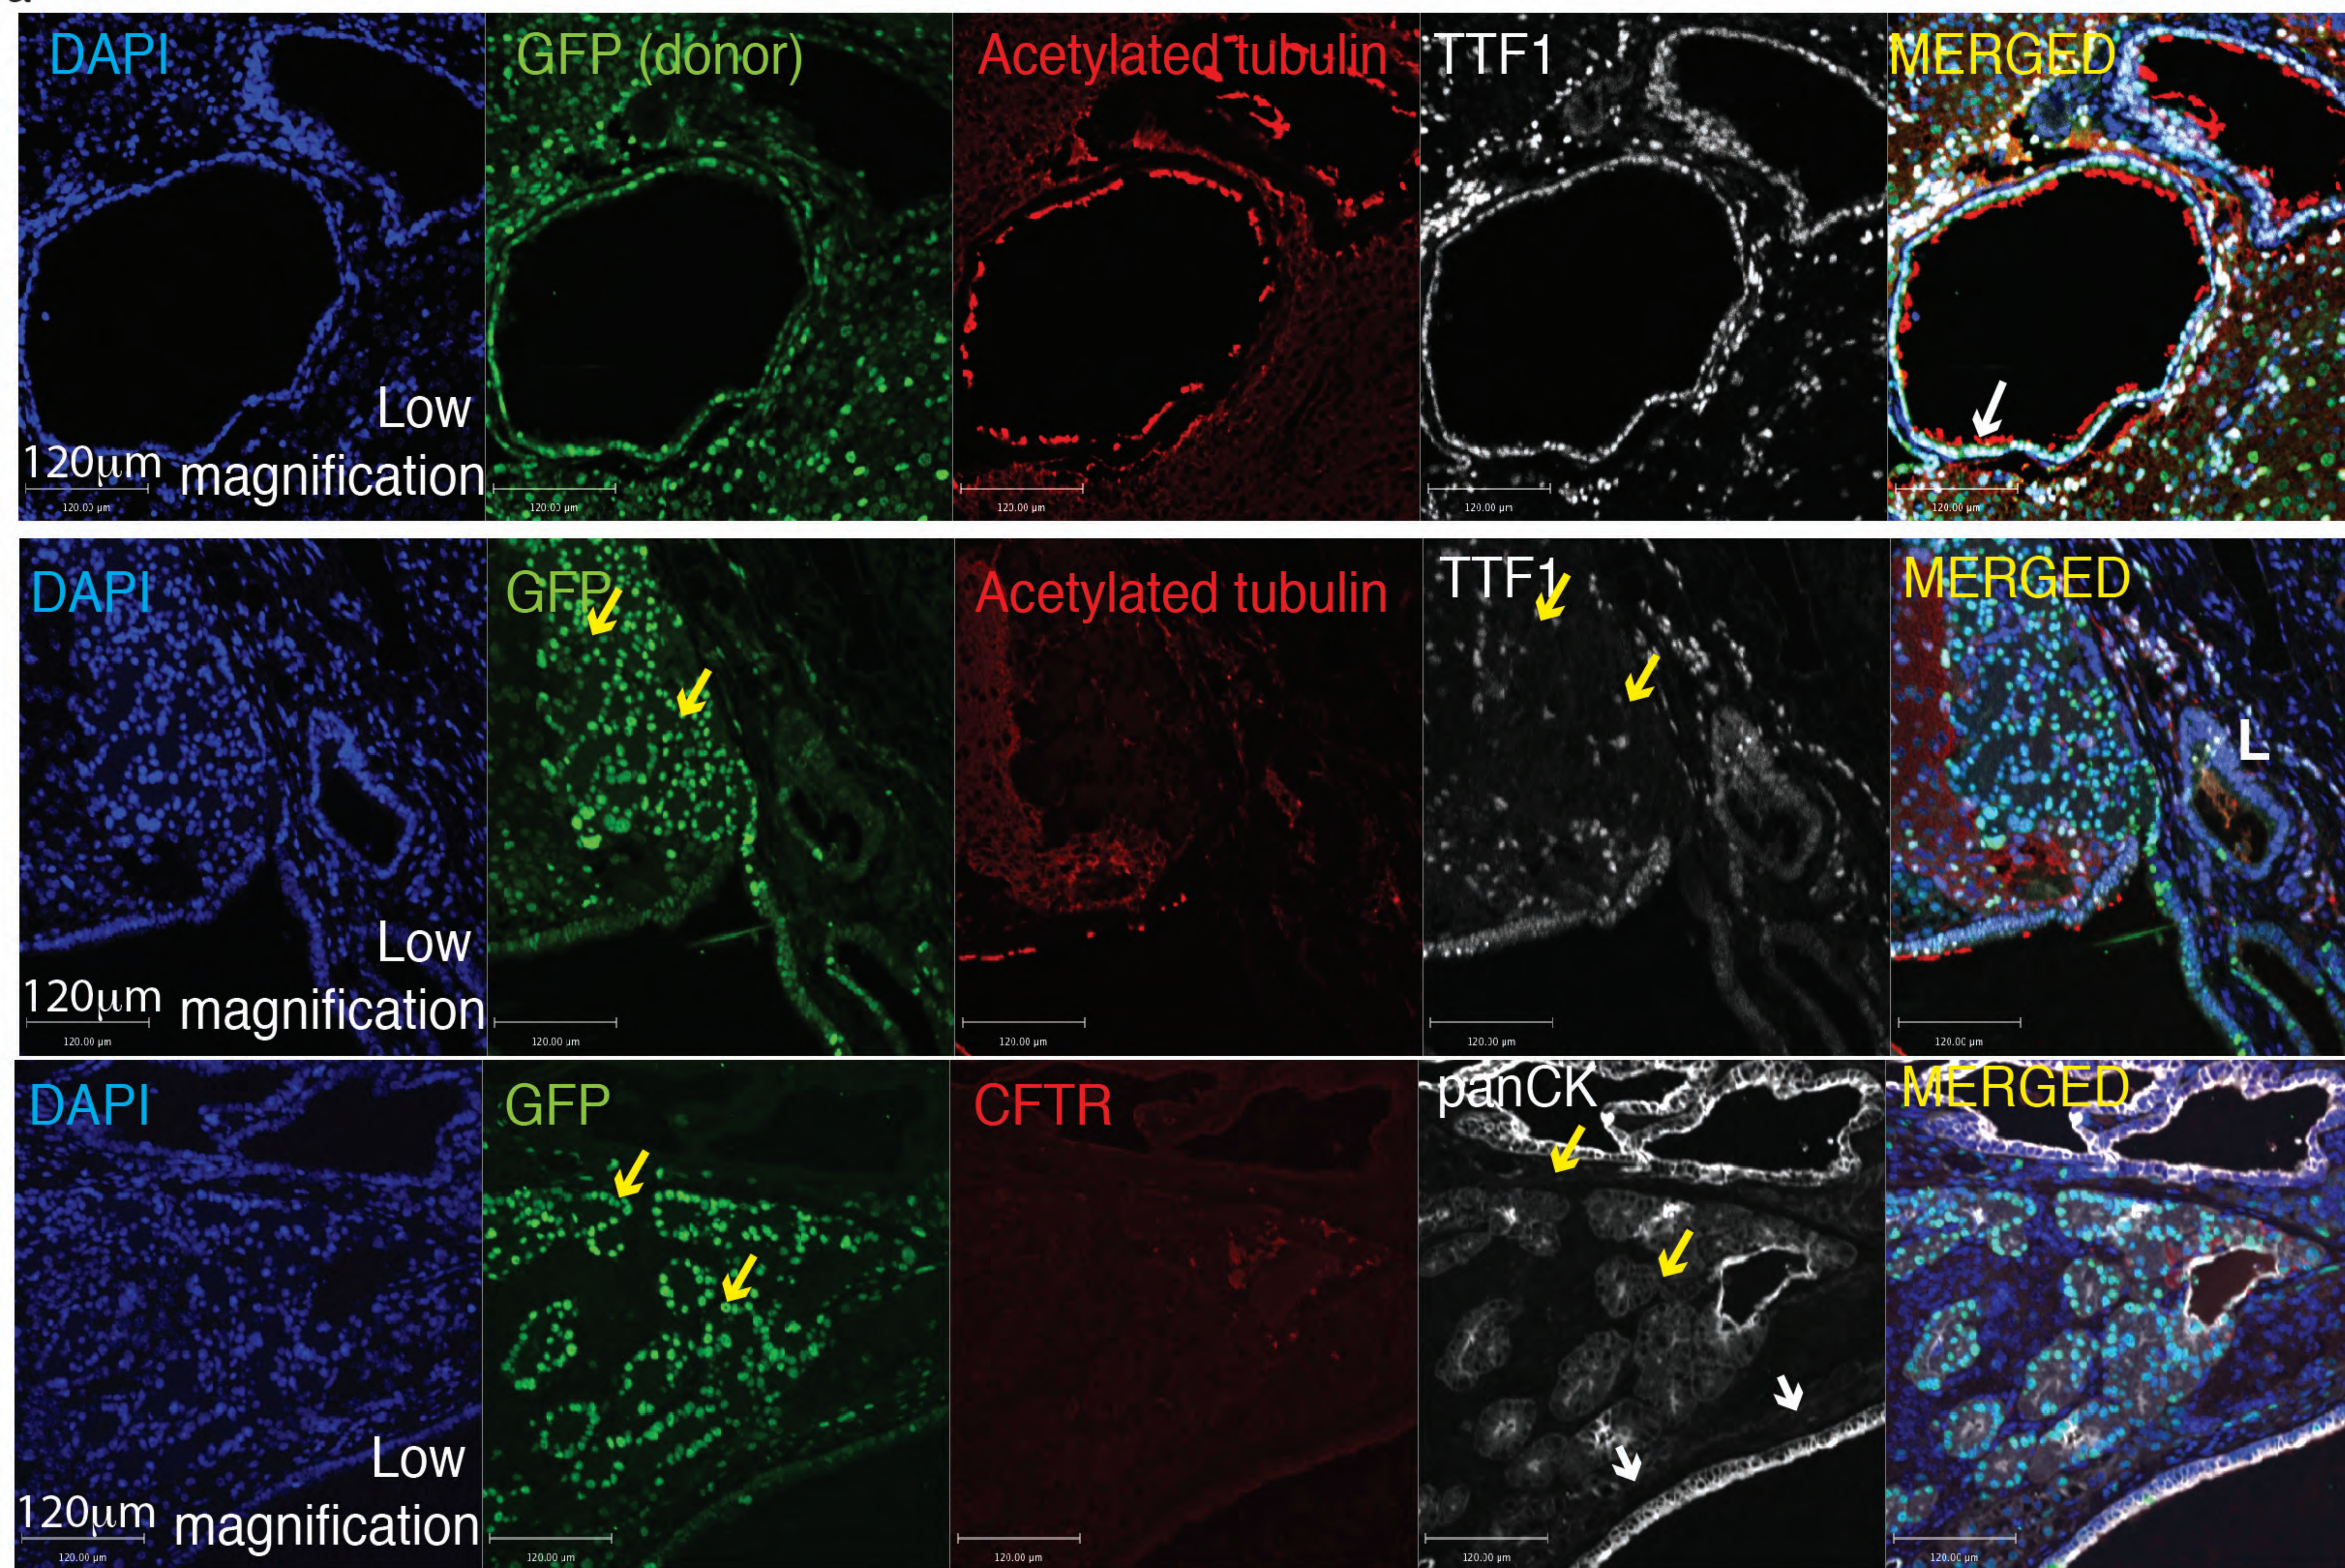

b

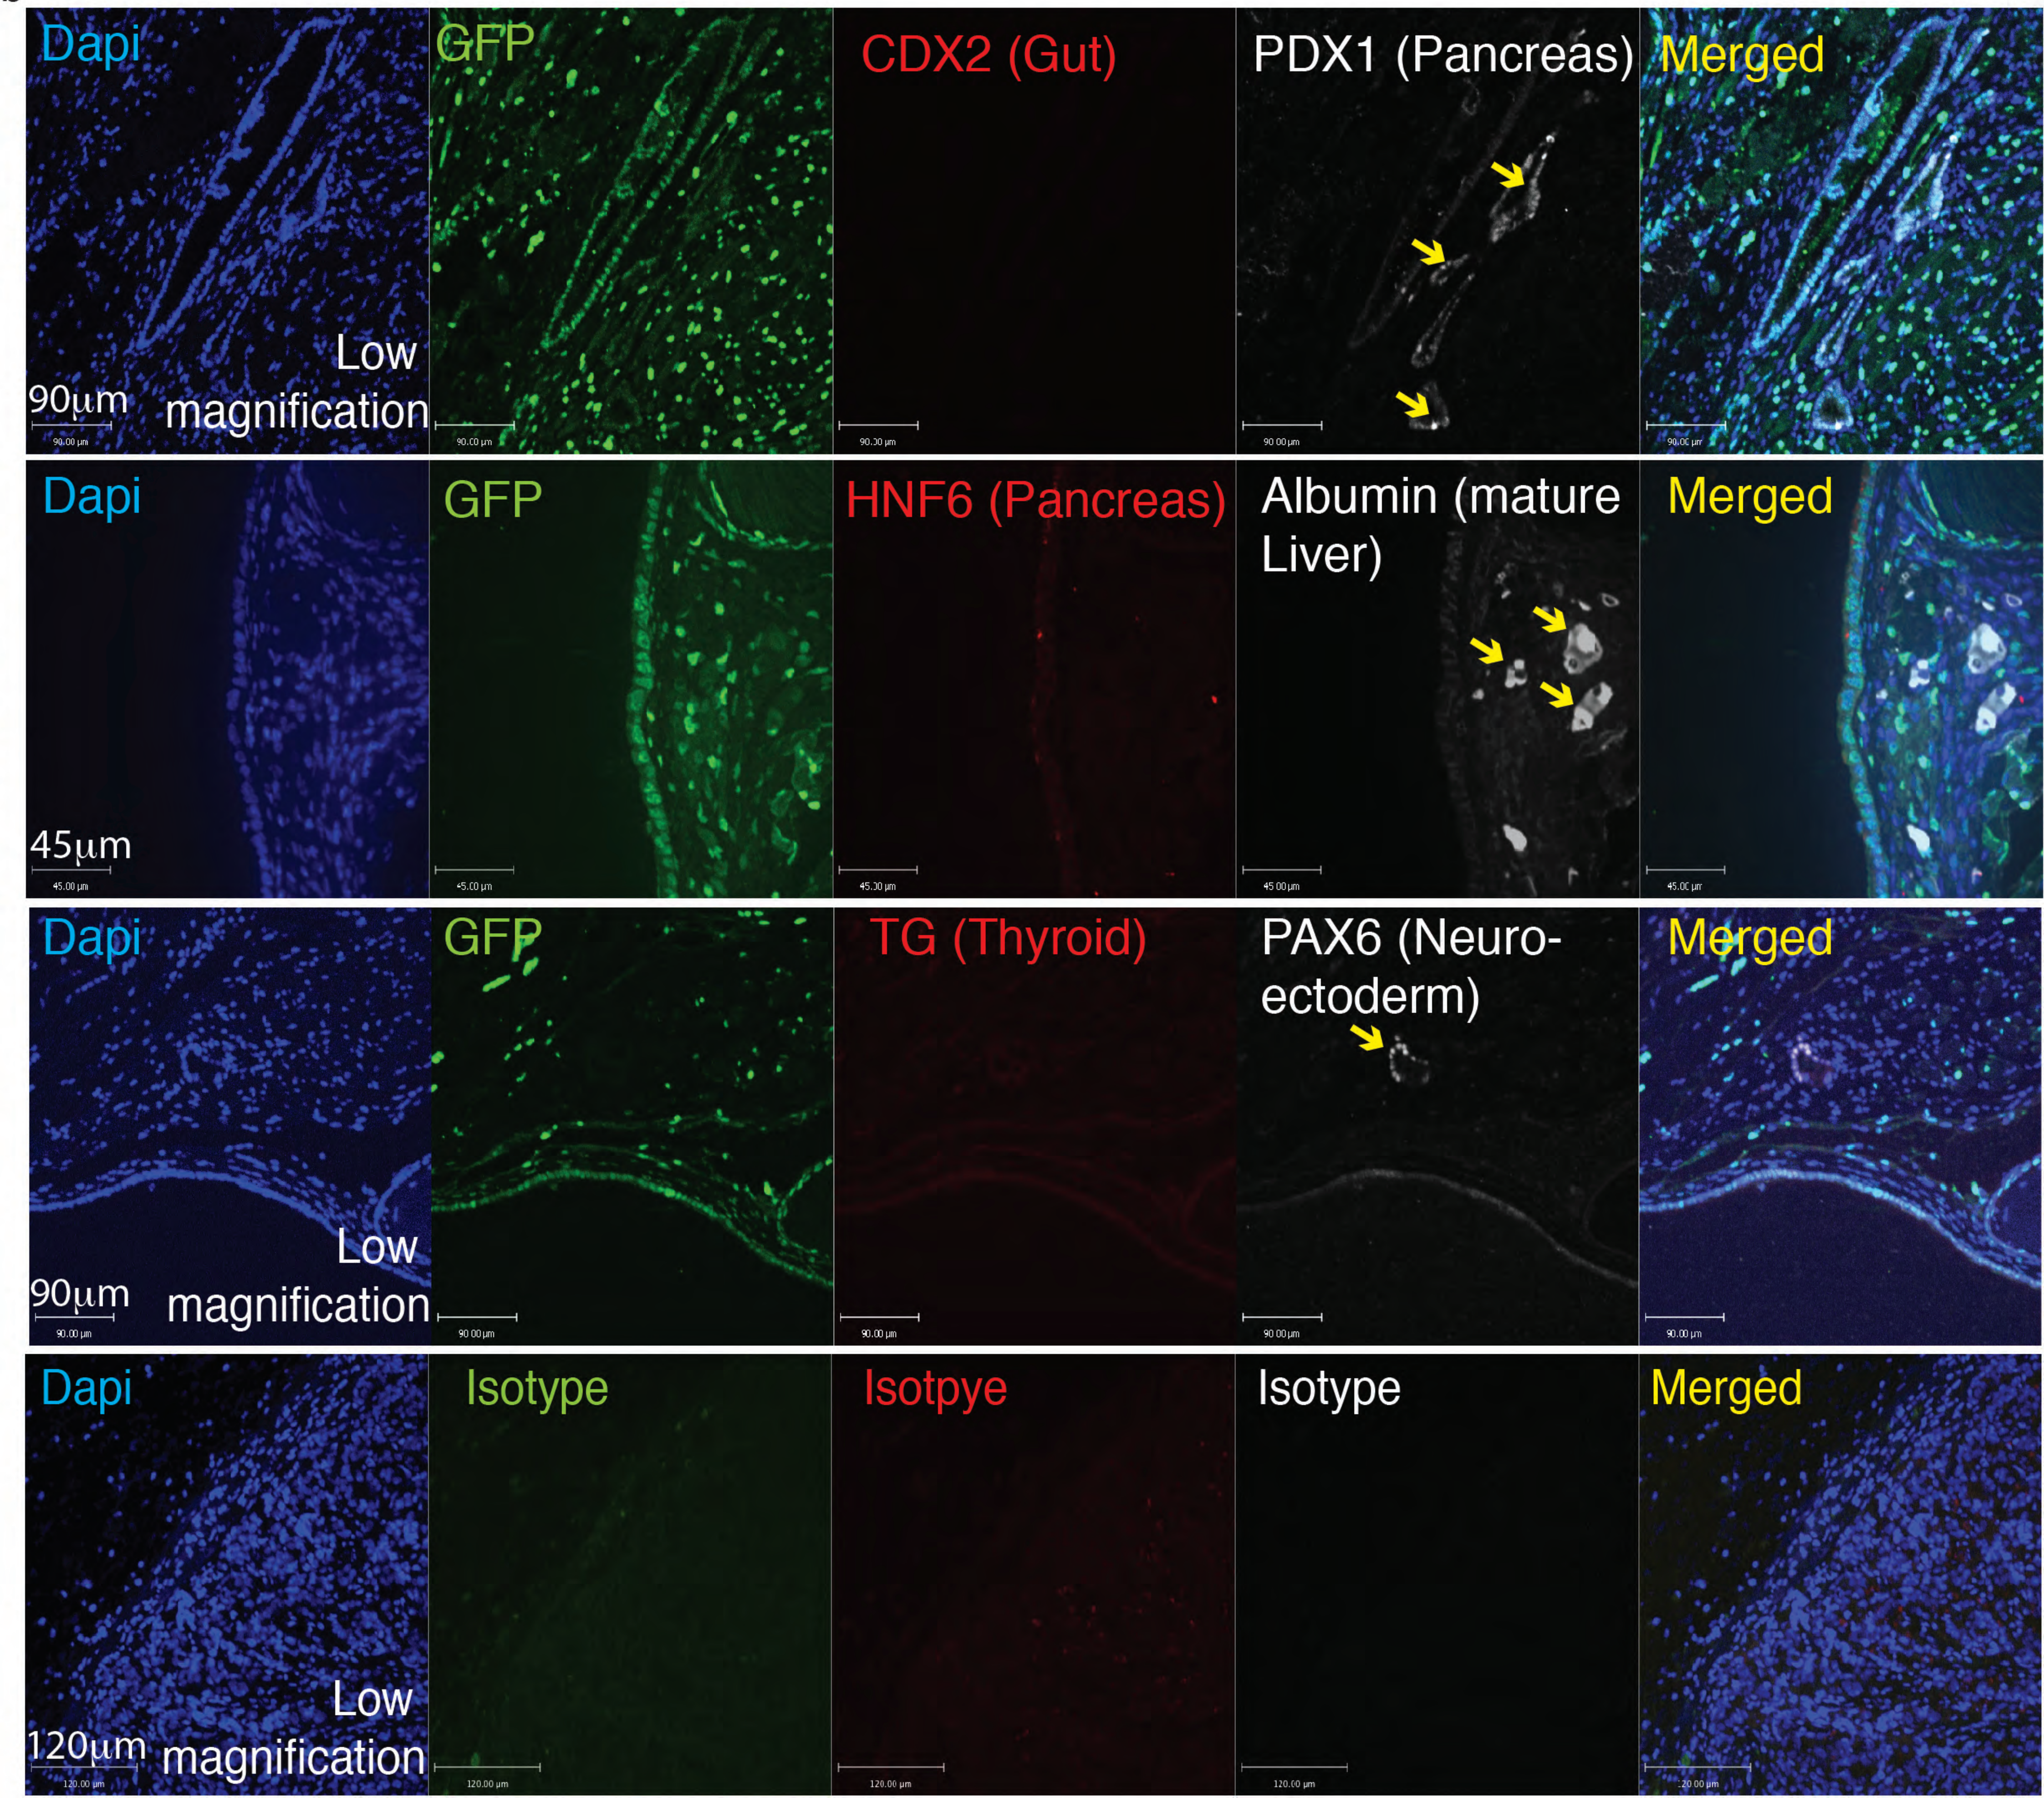

Supplementary Fig 10

a hESC only teratoma control

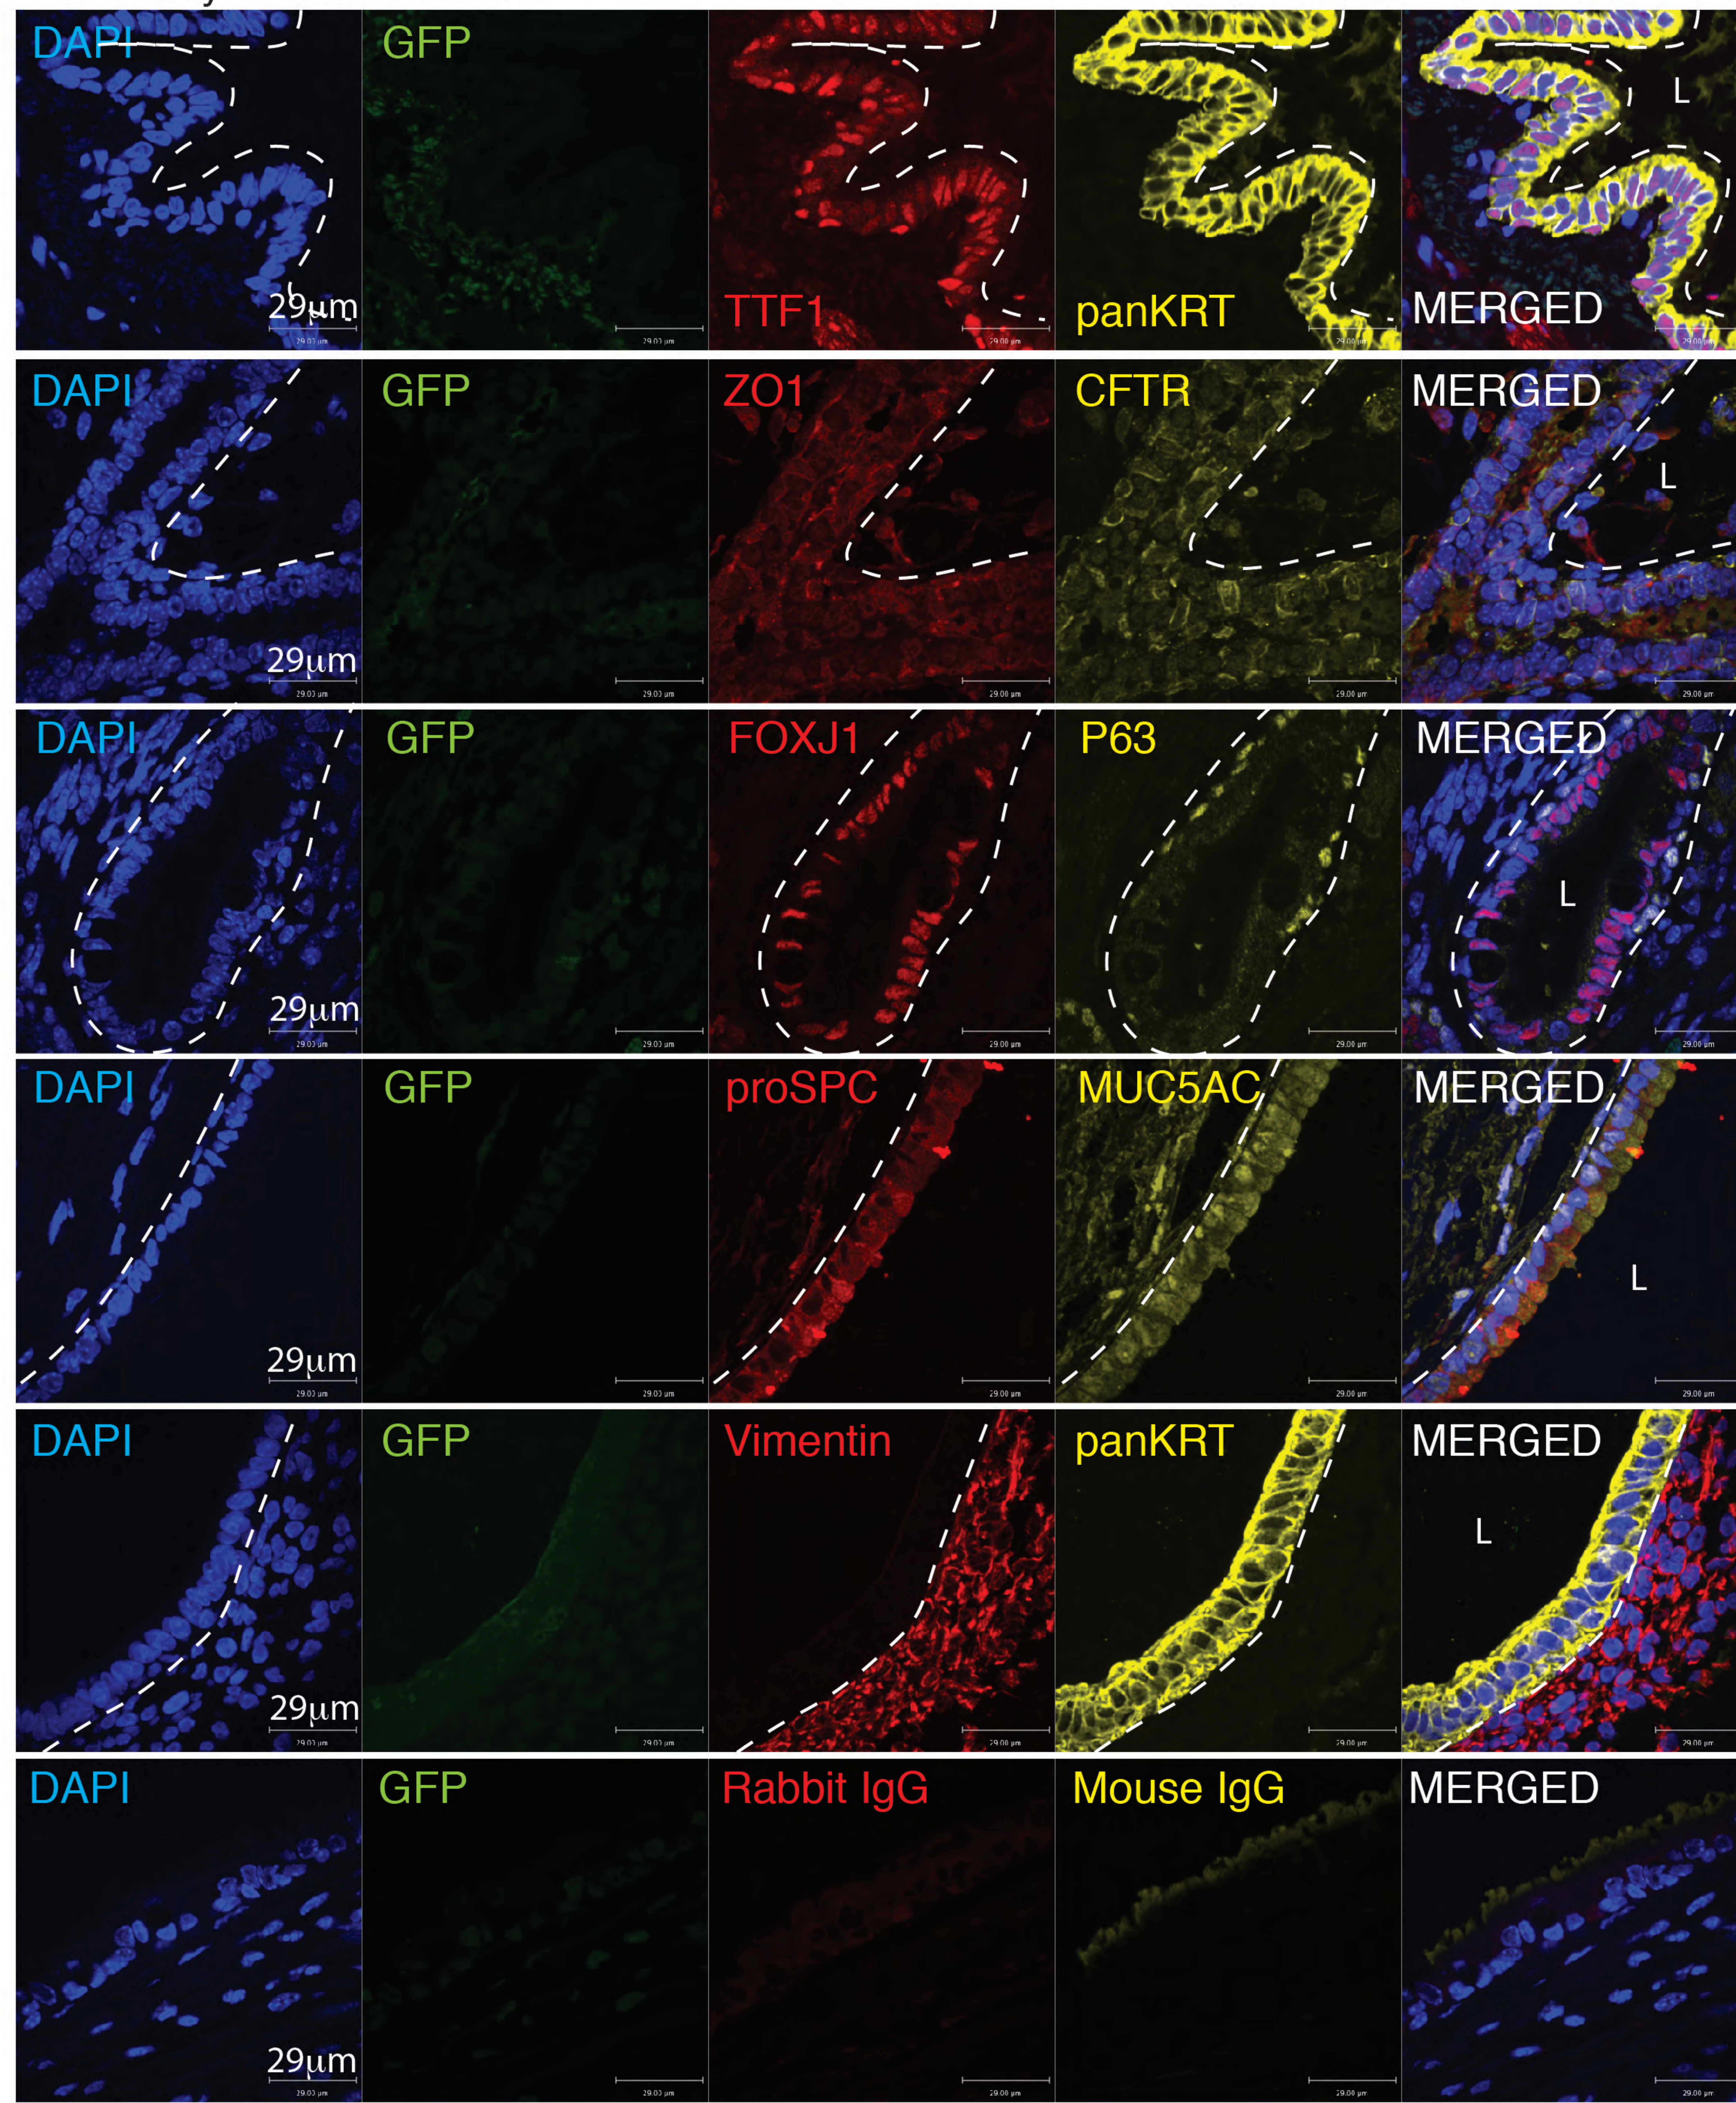

b Human lung/trachea control

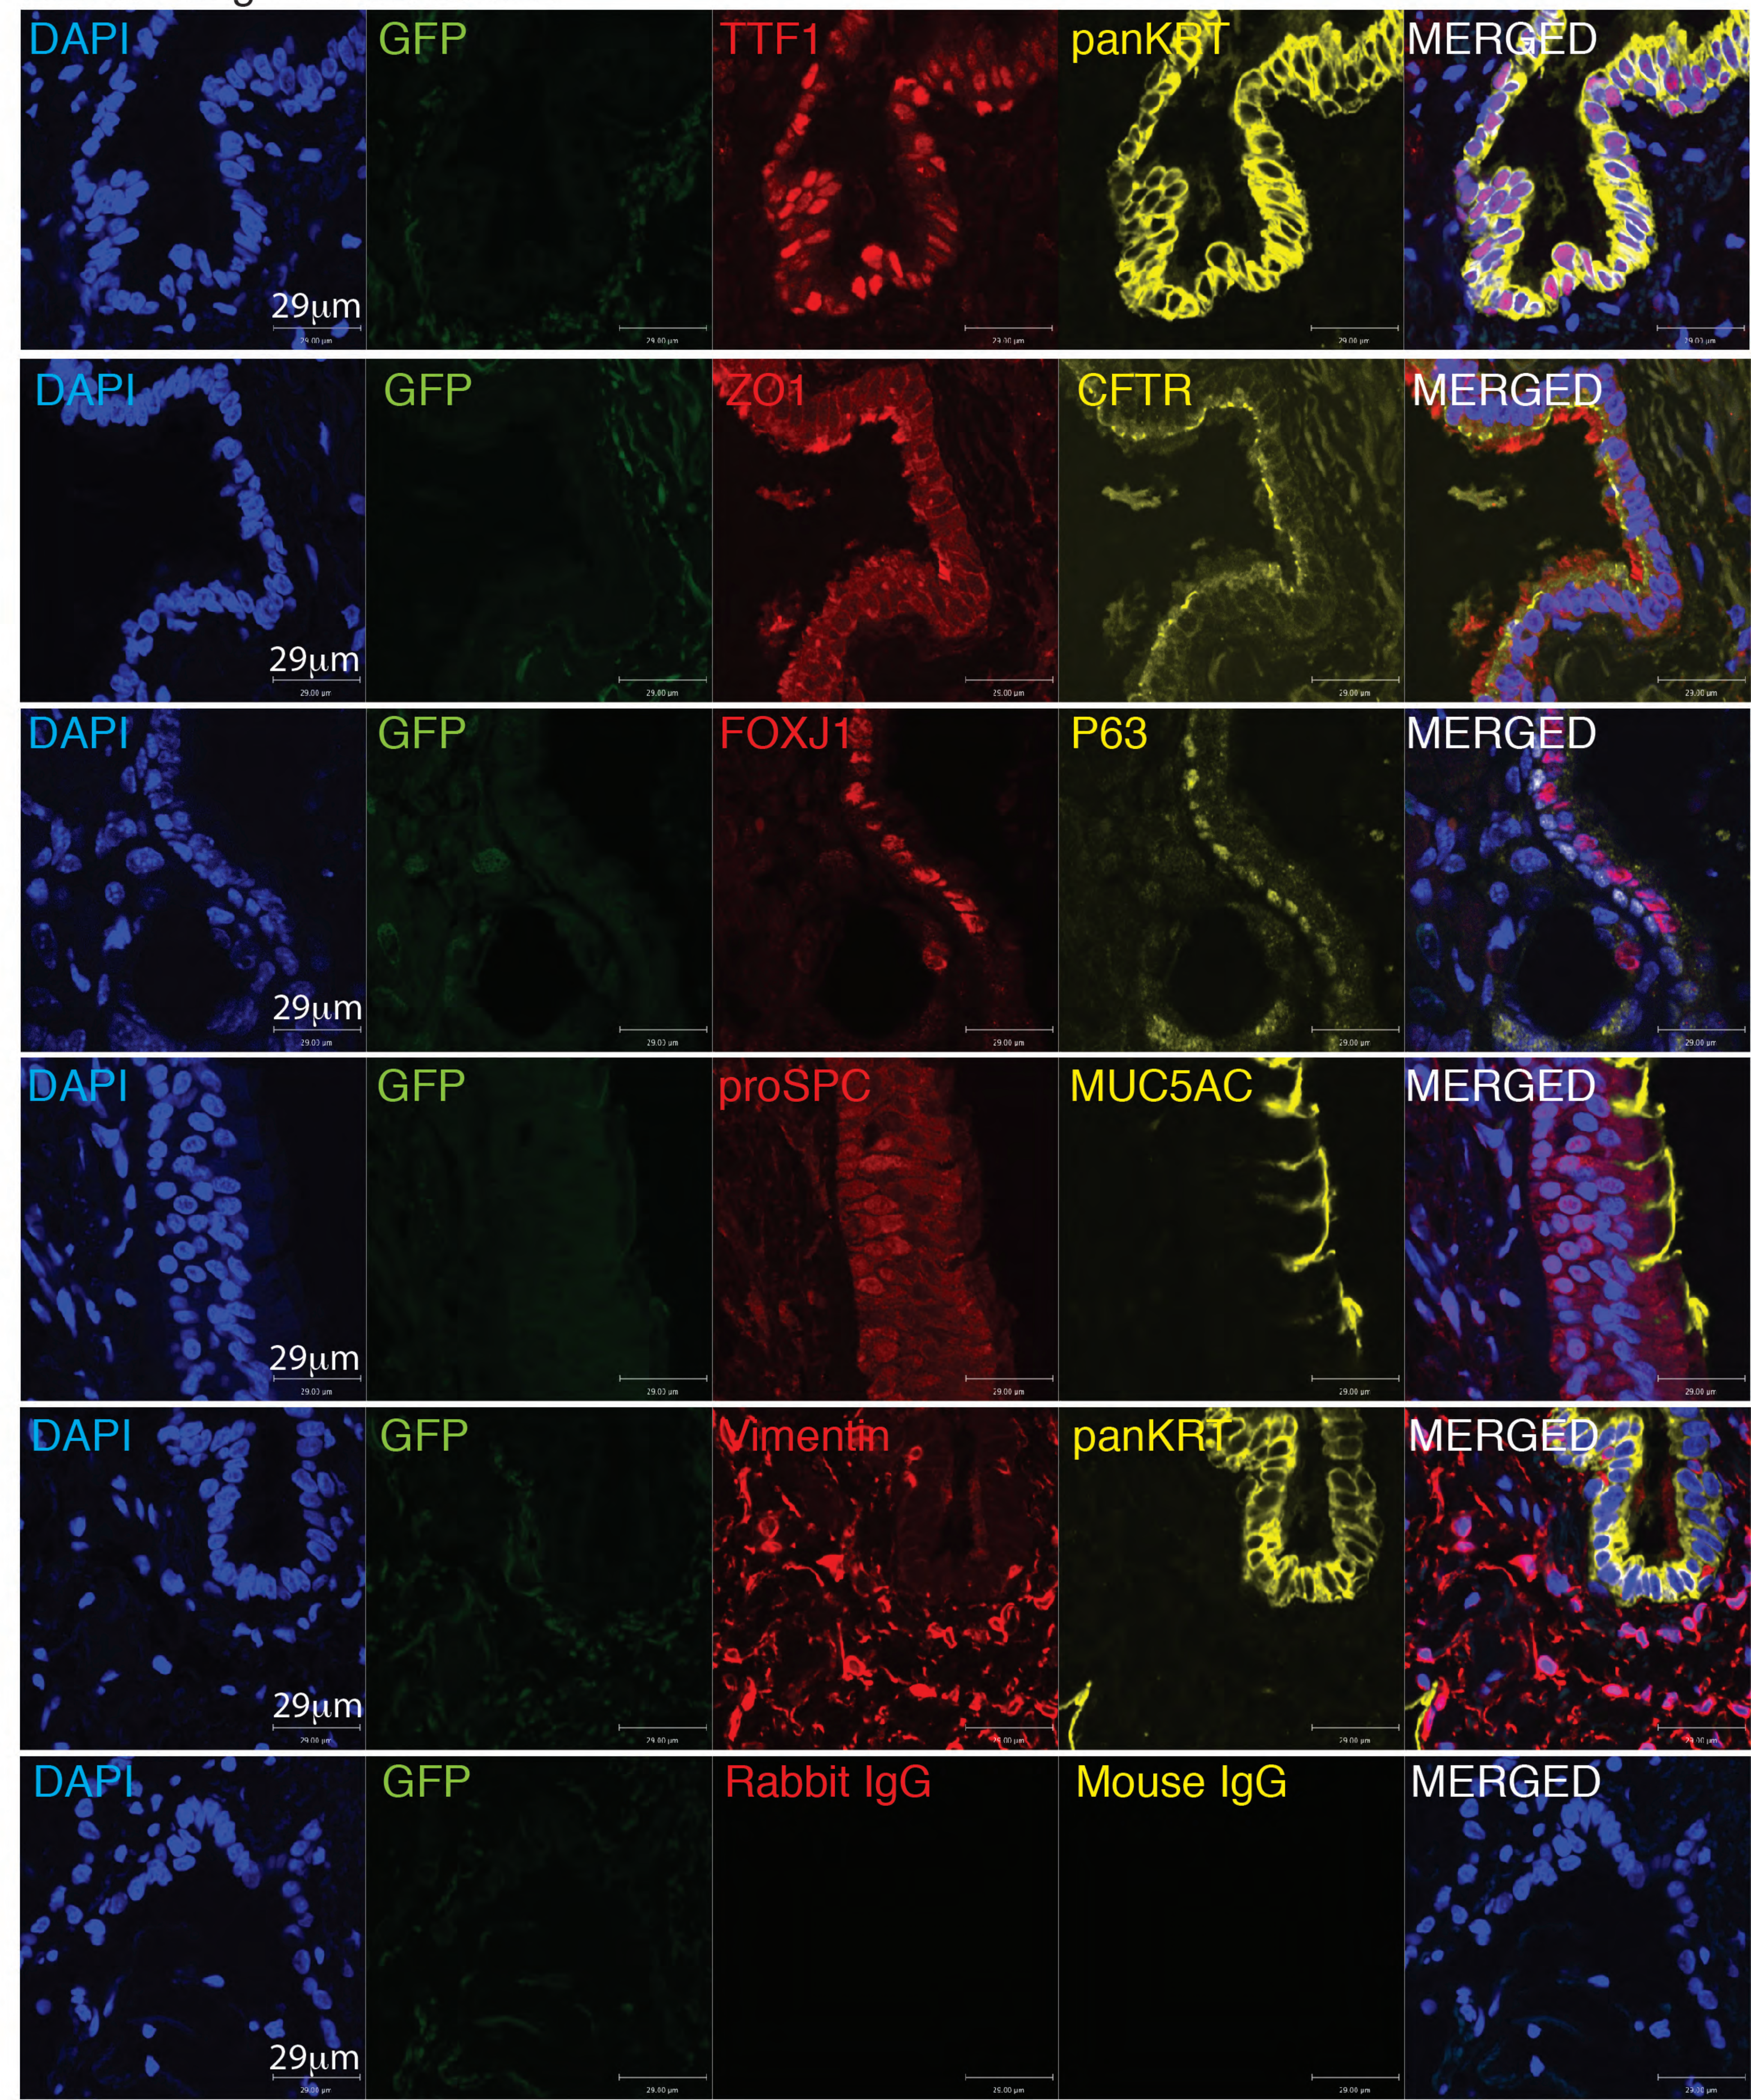

Supplement: Supplementary file 1 — Supplementary Files and Figures [file 41598_2019_45195_MOESM1_ESM.pdf]
